# Supplementary material for: Reliable reference miRNAs for quantitative gene expression analysis of stress responses in Caenorhabditis elegans
Source: PubMed Central journal article supplement (PMC3997968; doi:10.1186/1471-2164-15-222), 2014-03-21
Supplement: 1471-2164-15-222-S4.pdf [file 1471-2164-15-222-S4.pdf]

miRBase precursor : cel-mir-2  
 Total read count : 40667  
 cel-miR-2 read count : 40237  
 cel-miR-2\* read count : 412  
 remaining reads : 18

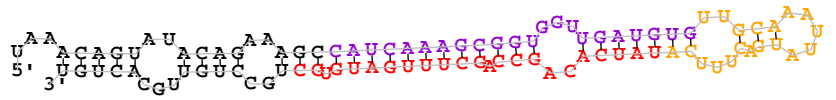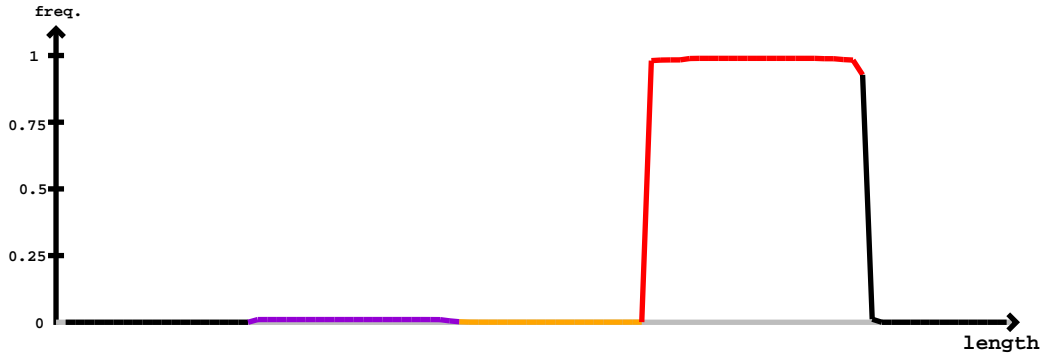

cel-miR-2

cel-miR-2\*

| 5' -  | cel-miR-2*                                | cel-miR-2           | -3'                                    | exp | reads | mm | sample |
|-------|-------------------------------------------|---------------------|----------------------------------------|-----|-------|----|--------|
| 5' -  | uaaacaguuacagaaagccaucaaaagcggugguugaugug | uugcaaaauaugacuuuca | uaucacagccagcuuugaugugcugccuguugcacugu |     |       |    |        |
| ...   | ((((((.....))))))                         |                     |                                        |     |       |    |        |
| ..... | caucaaaagcggugguugau                      |                     |                                        |     | 1     | 0  | bc4    |
| ..... | caucaaaagcggugguuUaug                     |                     |                                        |     | 1     | 1  | bc4    |
| ..... | caucaaaagcggugguugaug                     |                     |                                        |     | 16    | 0  | bc4    |
| ..... | caucaaaagcggugguugaugu                    |                     |                                        |     | 6     | 0  | bc4    |
| ..... | caucaaaagcggugguugaugug                   |                     |                                        |     | 8     | 0  | bc4    |
| ..... | uugcaaaauaugacuuuca                       |                     |                                        |     | 1     | 0  | bc4    |
| ..... | uaucacagccagcuuugaug                      |                     |                                        |     | 7     | 0  | bc4    |
| ..... | uaucacagccagcuuugaugu                     |                     |                                        |     | 5     | 0  | bc4    |
| ..... | uaucacagccagcuuugaugug                    |                     |                                        |     | 106   | 0  | bc4    |
| ..... | uaucacaUccagcuuugaugug                    |                     |                                        |     | 1     | 1  | bc4    |
| ..... | uaucacagccagcuuugauguU                    |                     |                                        |     | 4     | 1  | bc4    |
| ..... | uaucaUagccagcuuugaugug                    |                     |                                        |     | 1     | 1  | bc4    |
| ..... | uaucacagccagcuuugauguA                    |                     |                                        |     | 1     | 1  | bc4    |
| ..... | uauUacagccagcuuugaugugc                   |                     |                                        |     | 1     | 1  | bc4    |
| ..... | uaucacagccagcuuugaugGgc                   |                     |                                        |     | 5     | 1  | bc4    |
| ..... | uaucGcagccagcuuugaugugc                   |                     |                                        |     | 1     | 1  | bc4    |
| ..... | uaucacagccagcuuuUaugugc                   |                     |                                        |     | 2     | 1  | bc4    |
| ..... | uaucacagccagcuuugaugugG                   |                     |                                        |     | 11    | 1  | bc4    |
| ..... | uaucCgagccagcuuugaugugc                   |                     |                                        |     | 2     | 1  | bc4    |
| ..... | uaucacagccagcuuugaAaugugc                 |                     |                                        |     | 1     | 1  | bc4    |
| ..... | uaucacagccGgcuuugaugugc                   |                     |                                        |     | 1     | 1  | bc4    |
| ..... | uaucacagccagGuuugaugugc                   |                     |                                        |     | 2     | 1  | bc4    |
| ..... | uaucacagccagcuuugaugCgc                   |                     |                                        |     | 1     | 1  | bc4    |
| ..... | uaucacagccagcuuugaGgugc                   |                     |                                        |     | 1     | 1  | bc4    |
| ..... | uaucaUagccagcuuugaugugc                   |                     |                                        |     | 1     | 1  | bc4    |
| ..... | uauAacagccagcuuugaugugc                   |                     |                                        |     | 1     | 1  | bc4    |
| ..... | uaucaAagccagcuuugaugugc                   |                     |                                        |     | 3     | 1  | bc4    |
| ..... | uaucacagccagcuuugaUugc                    |                     |                                        |     | 1     | 1  | bc4    |
| ..... | uaucacaUccagcuuugaugugc                   |                     |                                        |     | 1     | 1  | bc4    |
| ..... | uGucacagccagcuuugaugugc                   |                     |                                        |     | 1     | 1  | bc4    |
| ..... | uaucacagAacagcuuugaugugc                  |                     |                                        |     | 1     | 1  | bc4    |
| ..... | uaucacagccagcuuuAaugugc                   |                     |                                        |     | 1     | 1  | bc4    |
| ..... | uaucacagccUgcuuugaugugc                   |                     |                                        |     | 2     | 1  | bc4    |
| ..... | uaucacagccCgcuuugaugugc                   |                     |                                        |     | 2     | 1  | bc4    |

cel-miR-2

cel-miR-2\*

uaaacagauacagaaagccaucacagcgggguugaugugugcaaaauuugacuuucauacacagccagcuuugaugugcugccguugcacugu

|                                     |      |   |     |
|-------------------------------------|------|---|-----|
| .....uaucaacagccagcuuugaugugA.....  | 4    | 1 | bc4 |
| .....uaucaacagccagcuuugauguAc.....  | 1    | 1 | bc4 |
| .....uaucaacagccagcuuugaugugU.....  | 13   | 1 | bc4 |
| .....uaucaacagccagcuuugaugAgc.....  | 1    | 1 | bc4 |
| .....uaucaacagcGagcuuugaugugc.....  | 1    | 1 | bc4 |
| .....Gaucaacagccagcuuugaugugc.....  | 1    | 1 | bc4 |
| .....uaucaacUgccagcuuugaugugc.....  | 2    | 1 | bc4 |
| .....uaucaacagccagcuuugauguCc.....  | 1    | 1 | bc4 |
| .....uaucaacagccagcuuugaCgugc.....  | 1    | 1 | bc4 |
| .....uaucaacagccagcuuugaugugc.....  | 2111 | 0 | bc4 |
| .....uaucaacGgccagcuuugaugugc.....  | 2    | 1 | bc4 |
| .....uauGacagccagcuuugaugugc.....   | 1    | 1 | bc4 |
| .....uaucaacagccagcuuugaugugcu..... | 16   | 0 | bc4 |
| .....uaucaacagccagcuuugaugugUu..... | 1    | 1 | bc4 |
| .....uaucaacagccagcuuugaugGgcu..... | 1    | 1 | bc4 |
| .....uaucaacagAcagcuuugaugugcu..... | 1    | 1 | bc4 |
| .....aucaacagccagcuuugaugugc.....   | 1    | 0 | bc4 |
| .....aucaacagccagcuuugaugugcu.....  | 1    | 0 | bc4 |
| .....ucacagccagcuuugaugugc.....     | 1    | 0 | bc4 |
| .....acagccagcuuugaugug.....        | 1    | 0 | bc4 |
| .....acagccagcuuugaugugc.....       | 12   | 0 | bc4 |
| .....caucaaaagcgggguugaug.....      | 11   | 0 | bc1 |
| .....caucaaaagcgggguugaugu.....     | 12   | 0 | bc1 |
| .....caucaaaagcgggguugaugug.....    | 2    | 0 | bc1 |
| .....caucaaaagcgggguugaugugu.....   | 1    | 0 | bc1 |
| .....uugcaaaauuugacuuuca.....       | 2    | 0 | bc1 |
| .....uaucaacagcAagcuuuga.....       | 1    | 1 | bc1 |
| .....uaucaacagccagcuuuga.....       | 4    | 0 | bc1 |
| .....uaucaacagccagcuuugaug.....     | 7    | 0 | bc1 |
| .....uaucaUagccagcuuugaug.....      | 1    | 1 | bc1 |
| .....uaucaacagccagcuuugaugu.....    | 1    | 0 | bc1 |
| .....uaucaacagccagcuuugauguU.....   | 5    | 1 | bc1 |
| .....uaucaacagccagcuuugauguA.....   | 1    | 1 | bc1 |
| .....uaucaacagccagcuuugaugug.....   | 110  | 0 | bc1 |
| .....uaucaacagccagcCuugaugug.....   | 1    | 1 | bc1 |
| .....uaucaacagccagGuuugaugugc.....  | 1    | 1 | bc1 |
| .....uaucaacagcAagcuuugaugugc.....  | 3    | 1 | bc1 |
| .....uaucaacGgccagcuuugaugugc.....  | 2    | 1 | bc1 |
| .....uaucaacagccagcuuugauguCc.....  | 1    | 1 | bc1 |
| .....uaucaacagccagcuuugaugugU.....  | 6    | 1 | bc1 |
| .....uaucaAagccagcuuugaugugc.....   | 1    | 1 | bc1 |
| .....uaucaacagccagcuuugaugugc.....  | 2689 | 0 | bc1 |
| .....uaucaacagccagcuuugUugugc.....  | 2    | 1 | bc1 |
| .....uaucaacagccagcuuugGugugc.....  | 1    | 1 | bc1 |
| .....uaucaacagccagcuuUaugugc.....   | 2    | 1 | bc1 |
| .....Caucaacagccagcuuugaugugc.....  | 1    | 1 | bc1 |
| .....uaucaacCgccagcuuugaugugc.....  | 1    | 1 | bc1 |
| .....uaucaacagccagcuuugaugugG.....  | 6    | 1 | bc1 |
| .....uaucaacagccagcuuugaAgugc.....  | 2    | 1 | bc1 |
| .....uaucaacagcGagcuuugaugugc.....  | 2    | 1 | bc1 |
| .....uaucaacagccagcuuUaugugc.....   | 1    | 1 | bc1 |
| .....uaucaacagccagcuuugCugugc.....  | 1    | 1 | bc1 |
| .....uaucaacagccagcuuugaugGgc.....  | 8    | 1 | bc1 |
| .....uGucacagccagcuuugaugugc.....   | 1    | 1 | bc1 |
| .....uaucaacagccagcuuugaUugc.....   | 1    | 1 | bc1 |
| .....uaucaacUgccagcuuugaugugc.....  | 1    | 1 | bc1 |
| .....uaucaacagccagAuugaugugc.....   | 2    | 1 | bc1 |
| .....uaucaacUccagcuuugaugugc.....   | 2    | 1 | bc1 |
| .....uauGacagccagcuuugaugugc.....   | 2    | 1 | bc1 |
| .....uaucaacagccagcuuugaGgugc.....  | 3    | 1 | bc1 |
| .....uaucaacagccagcuuugauguA.....   | 2    | 1 | bc1 |
| .....uaucaacagccagcuuugaugCgc.....  | 1    | 1 | bc1 |
| .....uaucaacagccagcuuUaugugc.....   | 2    | 1 | bc1 |
| .....uaucaacagccagcuGugaugugcu..... | 3    | 1 | bc1 |
| .....uaucaacagccagcuuugaugugcA..... | 3    | 1 | bc1 |
| .....uaucaacagccagcuuugaugugcu..... | 32   | 0 | bc1 |

cel-miR-2

cel-miR-2\*

uaaacagauacagaaagccaucacagcgugguugaugugugcaaaauuugacuuucaucaacagccagcguugaugugcugccugugcacugu

|                                                    |      |   |     |
|----------------------------------------------------|------|---|-----|
| .....uaucaacagccagcguugaugugc.....                 | 1    | 1 | bc1 |
| .....aucacagccagcguugaugugc.....                   | 5    | 0 | bc1 |
| .....aucacagccagcguugaugugc.....                   | 1    | 1 | bc1 |
| .....aucacagccagcguugaugugc.....                   | 1    | 0 | bc1 |
| .....ucacagccagcguugaugugc.....                    | 1    | 0 | bc1 |
| .....cacagccagcguugaugugc.....                     | 1    | 0 | bc1 |
| .....acagccagcguugaugugc.....                      | 19   | 0 | bc1 |
| .....caucaaaagcgugguugau.....                      | 1    | 0 | bc3 |
| .....caucaaaagcgugguugaug.....                     | 20   | 0 | bc3 |
| .....caucaaaagcgugguugaugu.....                    | 14   | 0 | bc3 |
| .....caucaaaagcgugguugauUu.....                    | 1    | 1 | bc3 |
| .....caucaaaagcgugguugaugug.....                   | 10   | 0 | bc3 |
| .....caucaaaagcgugguugauguU.....                   | 1    | 1 | bc3 |
| .....caucaaaagcgugguugaugugu.....                  | 2    | 0 | bc3 |
| .....caucaaaagcgugguugauguguucaaaauuugacuuuca..... | 1    | 0 | bc3 |
| .....uugcaaaauuugacuuuca.....                      | 2    | 0 | bc3 |
| .....uugcaaaauuugCcuuuca.....                      | 1    | 1 | bc3 |
| .....Cuaucacagccagcguugaugugc.....                 | 1    | 1 | bc3 |
| .....uaucaacagccagcguugau.....                     | 8    | 0 | bc3 |
| .....uaucaacagccagcguugau.....                     | 1    | 0 | bc3 |
| .....uaucaacagccagcguugaug.....                    | 14   | 0 | bc3 |
| .....uGucacagccagcguugaugu.....                    | 1    | 1 | bc3 |
| .....uaucaacagccagcguugaugu.....                   | 12   | 0 | bc3 |
| .....uaucaacagccGgcuugaugug.....                   | 1    | 1 | bc3 |
| .....uaucaacagccagcguugauguG.....                  | 3    | 1 | bc3 |
| .....uaucaacagccagcguuUaugug.....                  | 1    | 1 | bc3 |
| .....uaucaacagccagcguugaugug.....                  | 278  | 0 | bc3 |
| .....uaucaacagccagcguugauguU.....                  | 12   | 1 | bc3 |
| .....uaucaacagccagcguuGugug.....                   | 1    | 1 | bc3 |
| .....uaucaacagccagcguugauA.....                    | 2    | 1 | bc3 |
| .....uaucaacagUcagcguugaugugc.....                 | 1    | 1 | bc3 |
| .....uaucaacagccaUcuugaugugc.....                  | 1    | 1 | bc3 |
| .....uaucaacagcGagcguugaugugc.....                 | 1    | 1 | bc3 |
| .....uaucaacagccagcguugauguUc.....                 | 1    | 1 | bc3 |
| .....uaucaacagccagGcuugaugugc.....                 | 1    | 1 | bc3 |
| .....uaucaacagccUgcuugaugugc.....                  | 1    | 1 | bc3 |
| .....uaucaacaUccagcguugaugugc.....                 | 3    | 1 | bc3 |
| .....uaucaacagccagcguugauCugc.....                 | 3    | 1 | bc3 |
| .....uaucaacagccagcguugauguA.....                  | 8    | 1 | bc3 |
| .....uaucaacagccagcguugaugugc.....                 | 1    | 1 | bc3 |
| .....uaucaacagccagUuuugaugugc.....                 | 2    | 1 | bc3 |
| .....uaCcacagccagcguugaugugc.....                  | 2    | 1 | bc3 |
| .....uaucaacagcUagcguugaugugc.....                 | 1    | 1 | bc3 |
| .....uaucaacagccagcguugaugugc.....                 | 5428 | 0 | bc3 |
| .....uaucaacagccagcguugaGugc.....                  | 1    | 1 | bc3 |
| .....uaucaacagccCgcuugaugugc.....                  | 2    | 1 | bc3 |
| .....uaucaacCgccagcguugaugugc.....                 | 1    | 1 | bc3 |
| .....uaucaacagccagAuuugaugugc.....                 | 1    | 1 | bc3 |
| .....uaucaacagccagcguuAgaugugc.....                | 1    | 1 | bc3 |
| .....uaucaacagccagcguuUaugugc.....                 | 3    | 1 | bc3 |
| .....uaucaacagccagcguugauguAc.....                 | 4    | 1 | bc3 |
| .....uaucaacagccagcguuGaugugc.....                 | 1    | 1 | bc3 |
| .....uaucaacagccagcguuugauguU.....                 | 14   | 1 | bc3 |
| .....uaucaacagccagcguugaCgugc.....                 | 1    | 1 | bc3 |
| .....uauAacagccagcguugaugugc.....                  | 1    | 1 | bc3 |
| .....uaucaacagccagcguugaugugc.....                 | 2    | 1 | bc3 |
| .....uaucaacagccagcguugauAugc.....                 | 3    | 1 | bc3 |
| .....uaucaacagccGgcuugaugugc.....                  | 3    | 1 | bc3 |
| .....uaucaacagccagcguuGugugc.....                  | 1    | 1 | bc3 |
| .....uauGacagccagcguugaugugc.....                  | 1    | 1 | bc3 |
| .....uaucaacagccagcguugaugGgc.....                 | 17   | 1 | bc3 |
| .....uauUacagccagcguugaugugc.....                  | 1    | 1 | bc3 |
| .....uaucaacagccagcguugaugCgc.....                 | 5    | 1 | bc3 |
| .....uaucaacagccagcguugaugugc.....                 | 1    | 1 | bc3 |
| .....uaucaacagAcagcguugaugugc.....                 | 1    | 1 | bc3 |
| .....uaucaacagccagcAuuugaugugc.....                | 1    | 1 | bc3 |
| .....uaucaacagccaCcuugaugugc.....                  | 2    | 1 | bc3 |
| .....Aaucaacagccagcguugaugugc.....                 | 1    | 1 | bc3 |

cel-miR-2\*

uaaacagauaucagaaagccaucacaaagcggugguugaugugugcaaaauuugacuuucauaucaacagccagcuuugaugugcugccuguugcacugu

|                                                        |      |   |     |
|--------------------------------------------------------|------|---|-----|
| .....uaucaacagccagcCuugaugugc.....                     | 7    | 1 | bc3 |
| .....uaucaacagccagcuuugaugugG.....                     | 9    | 1 | bc3 |
| .....uaucaacGgcccagcuuugaugugc.....                    | 2    | 1 | bc3 |
| .....uaucaUagccagcuuugaugugc.....                      | 1    | 1 | bc3 |
| .....uaucaacagccagcuuugauUugc.....                     | 1    | 1 | bc3 |
| .....uaucaacagccagcuuugaugugcA.....                    | 13   | 1 | bc3 |
| .....uaAacagccagcuuugaugugcu.....                      | 1    | 1 | bc3 |
| .....uaucaacagccagcuuugaugugcu.....                    | 51   | 0 | bc3 |
| .....uaucaacagccagcuuugaugugUu.....                    | 1    | 1 | bc3 |
| .....aucacagccagcuuugaug.....                          | 1    | 0 | bc3 |
| .....aucacagccagcuuugaugug.....                        | 3    | 0 | bc3 |
| .....aucacagccagcuuugaugugc.....                       | 5    | 0 | bc3 |
| .....ucacagccagcuuugaugugcA.....                       | 1    | 1 | bc3 |
| .....ucacagccagcuuugaugugcu.....                       | 2    | 0 | bc3 |
| .....cacagccagcuuugaugugc.....                         | 1    | 0 | bc3 |
| .....acagccagcuuugaugug.....                           | 2    | 0 | bc3 |
| .....acagccagcuuugaugugc.....                          | 24   | 0 | bc3 |
| .....acagccagcuuugaugugcu.....                         | 2    | 0 | bc3 |
| .....caucaaaagcggugguuga.....                          | 2    | 0 | bc6 |
| .....caucaaaagcggugguugau.....                         | 2    | 0 | bc6 |
| .....caucaaaCgcccagguugau.....                         | 1    | 1 | bc6 |
| .....caucaaaagcggugguugaug.....                        | 40   | 0 | bc6 |
| .....caucaaaagcggAgguugaug.....                        | 1    | 1 | bc6 |
| .....caucaaaagcggCgguugaug.....                        | 1    | 1 | bc6 |
| .....cCucaaaagcggugguugaug.....                        | 1    | 1 | bc6 |
| .....caucaaaagcggugguugaugu.....                       | 27   | 0 | bc6 |
| .....caucaaaagcggGgguugaugu.....                       | 1    | 1 | bc6 |
| .....caucaaaaCgcccagguugaugu.....                      | 1    | 1 | bc6 |
| .....caucaaaagcggugguugaugug.....                      | 15   | 0 | bc6 |
| .....caucaaaagcggugguugauAug.....                      | 1    | 1 | bc6 |
| .....caucaaaagcggugguugauguggu.....                    | 3    | 0 | bc6 |
| .....caucaaaagcggugguugaugugugcaaaauuugacuuucauUu..... | 1    | 1 | bc6 |
| .....uugcaaaauuugacuuuca.....                          | 4    | 0 | bc6 |
| .....uugcaaaauuugacuuucUua.....                        | 1    | 1 | bc6 |
| .....Aauaucaacagccagcuuugaugugc.....                   | 2    | 1 | bc6 |
| .....uaucaacagccagcuuuga.....                          | 15   | 0 | bc6 |
| .....uaucaacagccagcuuugaug.....                        | 20   | 0 | bc6 |
| .....uaucaacagccagAuuugaugu.....                       | 1    | 1 | bc6 |
| .....uaucaacagccagcuuugaugu.....                       | 19   | 0 | bc6 |
| .....uaucaacagccagcuuugauguC.....                      | 2    | 1 | bc6 |
| .....uaucaacagccaAcuuugaugug.....                      | 1    | 1 | bc6 |
| .....uaucaacagccagcuuugauUug.....                      | 1    | 1 | bc6 |
| .....uaucaacagccUgcuuugaugug.....                      | 1    | 1 | bc6 |
| .....uaucaacagccagcuuugauguA.....                      | 1    | 1 | bc6 |
| .....uaucaacagccagcuuugaugug.....                      | 328  | 0 | bc6 |
| .....uaucaacagccagcuuugaugugG.....                     | 1    | 1 | bc6 |
| .....uaucaacagccagcuuugauguU.....                      | 10   | 1 | bc6 |
| .....uaucaacagccagcuuugaugugc.....                     | 5847 | 0 | bc6 |
| .....uaucaacaAccagcuuugaugugc.....                     | 2    | 1 | bc6 |
| .....uaucaacagccagAuuugaugugc.....                     | 2    | 1 | bc6 |
| .....uaucaacagccaAcuuugaugugc.....                     | 1    | 1 | bc6 |
| .....uaucaAagccagcuuugaugugc.....                      | 1    | 1 | bc6 |
| .....uaucaacagccagcuuugaugugA.....                     | 11   | 1 | bc6 |
| .....uGucacagccagcuuugaugugc.....                      | 1    | 1 | bc6 |
| .....uaucaacagccagcuuugaugugc.....                     | 2    | 1 | bc6 |
| .....uauccagccagcuuugaugugc.....                       | 1    | 1 | bc6 |
| .....uaucaacagccagcuuugaugugU.....                     | 41   | 1 | bc6 |
| .....uaucaacagccagcuuugaugugGc.....                    | 14   | 1 | bc6 |
| .....uaucaacagccGgcuuugaugugc.....                     | 2    | 1 | bc6 |
| .....uaucaacagccagUuuugaugugc.....                     | 1    | 1 | bc6 |
| .....Aaucaacagccagcuuugaugugc.....                     | 1    | 1 | bc6 |
| .....uauAacagccagcuuugaugugc.....                      | 1    | 1 | bc6 |
| .....uaucaacagccagcuuugauguAc.....                     | 2    | 1 | bc6 |
| .....uaucaacagcccGcuuugaugugc.....                     | 4    | 1 | bc6 |
| .....Caucacagccagcuuugaugugc.....                      | 1    | 1 | bc6 |
| .....uaucaacagccagcuuugauCugc.....                     | 3    | 1 | bc6 |
| .....uaucaacagccUgcuuugaugugc.....                     | 2    | 1 | bc6 |
| .....uauccagccagcuuugaugugc.....                       | 1    | 1 | bc6 |

cel-miR-2\*

uaaacagauacagaaagccaucacagcggugguugaugugugcaaaauaugacuucacaucaucagccagcuuugaugugcugccugugcacugu

|                                      |     |   |     |
|--------------------------------------|-----|---|-----|
| ..... uaucaUagccagcuuugaugugc.....   | 2   | 1 | bc6 |
| ..... uaucaUgcccagcuuugaugugc.....   | 1   | 1 | bc6 |
| ..... uaucaUgcccagcuuugaugugc.....   | 2   | 1 | bc6 |
| ..... uauUacagccagcuuugaugugc.....   | 2   | 1 | bc6 |
| ..... uaucaUgcccagcuuugaugugc.....   | 3   | 1 | bc6 |
| ..... uaucaUgcccagcuuugauguUc.....   | 1   | 1 | bc6 |
| ..... uaCcacagccagcuuugaugugc.....   | 2   | 1 | bc6 |
| ..... uaucaUgcccagcuuugaugugc.....   | 4   | 1 | bc6 |
| ..... uaucaUgcccagcuuugauUugc.....   | 3   | 1 | bc6 |
| ..... uaucaUgcccagcCuugaugugc.....   | 2   | 1 | bc6 |
| ..... uaucaUgcccagcuuugaugugG.....   | 44  | 1 | bc6 |
| ..... uaucaUgcccagcuuugaugugc.....   | 1   | 1 | bc6 |
| ..... uaucaUgcccagcuuugaugGc.....    | 5   | 1 | bc6 |
| ..... uaucaUgcccagcuuugaugAgc.....   | 1   | 1 | bc6 |
| ..... uaucaUgcccagcuuugaugugc.....   | 3   | 1 | bc6 |
| ..... uaGcacagccagcuuugaugugc.....   | 1   | 1 | bc6 |
| ..... uaucaUgcccagcuuugaugugc.....   | 2   | 1 | bc6 |
| ..... uaucaUgcccagcuuugaGgugc.....   | 2   | 1 | bc6 |
| ..... uaucaUgcccagcuUgugaugugc.....  | 1   | 1 | bc6 |
| ..... uaucaUgcccagcuuugauAugc.....   | 7   | 1 | bc6 |
| ..... uaucaUgcccagcuuugaugugc.....   | 2   | 1 | bc6 |
| ..... uaucaUgcccagcuuugUugugc.....   | 1   | 1 | bc6 |
| ..... uaucaUgcccagcuuugaugugcu.....  | 1   | 1 | bc6 |
| ..... uaucaUgcccagcuuugaugugG.....   | 1   | 1 | bc6 |
| ..... uaucaUgcccagcuuugaugugcu.....  | 55  | 0 | bc6 |
| ..... uaucaUgcccagcuuugaugugcA.....  | 8   | 1 | bc6 |
| ..... uaucaUgcccagcuuugaugugcuU..... | 1   | 1 | bc6 |
| ..... aucaUgcccagcuuugaugug.....     | 1   | 0 | bc6 |
| ..... aucaUgcccagcuuugaugugA.....    | 1   | 1 | bc6 |
| ..... aucaUgcccagcuuugaugugc.....    | 11  | 0 | bc6 |
| ..... aucaUgcccagcuuugaugugcu.....   | 2   | 0 | bc6 |
| ..... aucaUgcccagcuuugaugugcA.....   | 3   | 1 | bc6 |
| ..... ucagUgcccagcuuugaugugc.....    | 2   | 0 | bc6 |
| ..... ucagUgcccagcuuugaugugcu.....   | 1   | 0 | bc6 |
| ..... ucagUgcccagcuuugaugugcA.....   | 1   | 1 | bc6 |
| ..... acagUgcccagcuuugaugug.....     | 2   | 0 | bc6 |
| ..... acagUgcccagcuuugaugugc.....    | 34  | 0 | bc6 |
| ..... cagUgcccagcuuugaugugc.....     | 9   | 0 | bc6 |
| ..... caucUgcccagcuuugaugug.....     | 2   | 0 | bc5 |
| ..... caucUgcccagcuuugaugug.....     | 1   | 1 | bc5 |
| ..... caucUgcccagcuuugaugugG.....    | 1   | 1 | bc5 |
| ..... caucUgcccagcuuugaugug.....     | 71  | 0 | bc5 |
| ..... caucUgcccagcuuugaugug.....     | 42  | 0 | bc5 |
| ..... caucUgcccagcuuugaugug.....     | 1   | 1 | bc5 |
| ..... caCcaUgcccagcuuugaugug.....    | 1   | 1 | bc5 |
| ..... caucUgcccagcuuugaugug.....     | 1   | 1 | bc5 |
| ..... caucUgcccagcuuugaugug.....     | 14  | 0 | bc5 |
| ..... caucUgcccagcuuugaugugG.....    | 1   | 1 | bc5 |
| ..... caucUgcccagcuuugaugugAgug..... | 1   | 1 | bc5 |
| ..... caucUgcccagcuuugaugugug.....   | 2   | 0 | bc5 |
| ..... caucUgcccagcuuugauguguu.....   | 1   | 0 | bc5 |
| ..... augugUgcccagcuuugaugug.....    | 1   | 0 | bc5 |
| ..... uugcaaaauaugacuucac.....       | 3   | 0 | bc5 |
| ..... CuaucaUgcccagcuuugaugugc.....  | 2   | 1 | bc5 |
| ..... uaucaUgcccagcuuuga.....        | 9   | 0 | bc5 |
| ..... uaucaUgcccagcuuugaug.....      | 24  | 0 | bc5 |
| ..... uaucaUgcccagcuuugaugug.....    | 16  | 0 | bc5 |
| ..... uaucaUgcccagcuuugaugGg.....    | 2   | 1 | bc5 |
| ..... uaucaUgcccagcuuugauguU.....    | 17  | 1 | bc5 |
| ..... uaucaUgcccagcuuugCugug.....    | 1   | 1 | bc5 |
| ..... uaucaUgcccagcuuugauUug.....    | 1   | 1 | bc5 |
| ..... uaucaUgcccagcuuugUugug.....    | 2   | 1 | bc5 |
| ..... uaucaUgcccagcuuugaGgug.....    | 1   | 1 | bc5 |
| ..... uaucaUgcccagcuuugaugug.....    | 1   | 1 | bc5 |
| ..... uaucaUgcccagcuuugauguC.....    | 6   | 1 | bc5 |
| ..... uaucaUgcccagcuuugaugug.....    | 518 | 0 | bc5 |
| ..... uaucaUgcccagcuuugauguA.....    | 3   | 1 | bc5 |

cel-miR-2\*

uaaacagauacagaaagccaucacagcgugguugaugugugugcaaaauuugacuuucauauacacagccagcuuugaugugcugccguugcacugu

|                                     |      |   |     |
|-------------------------------------|------|---|-----|
| .....uaCcacagccagcuuugaugugc.....   | 2    | 1 | bc5 |
| .....uauacacagccagcuuugaugugG.....  | 34   | 1 | bc5 |
| .....uauacacagccagcuuugaugAgc.....  | 2    | 1 | bc5 |
| .....uauacacagAcagcuuugaugugc.....  | 1    | 1 | bc5 |
| .....uauacacUgcccagcuuugaugugc..... | 2    | 1 | bc5 |
| .....uauacacagccagcuuugaugGgc.....  | 14   | 1 | bc5 |
| .....uauacacagccagcCuugaugugc.....  | 5    | 1 | bc5 |
| .....uauacacagccagcuuugaCgugc.....  | 5    | 1 | bc5 |
| .....uauacacagccagcuuugaGgugc.....  | 3    | 1 | bc5 |
| .....Caucacagccagcuuugaugugc.....   | 1    | 1 | bc5 |
| .....uauacacagccagcuuugauAugc.....  | 9    | 1 | bc5 |
| .....uauacacagccCgcuuugaugugc.....  | 1    | 1 | bc5 |
| .....uauacacaCccagcuuugaugugc.....  | 2    | 1 | bc5 |
| .....uGucacagccagcuuugaugugc.....   | 2    | 1 | bc5 |
| .....uauGacagccagcuuugaugugc.....   | 3    | 1 | bc5 |
| .....uauacacagccagcuuugauUugc.....  | 6    | 1 | bc5 |
| .....uauacacagccagcuuugGugugc.....  | 4    | 1 | bc5 |
| .....uauacacagccaUcuuugaugugc.....  | 2    | 1 | bc5 |
| .....uauacacagGcagcuuugaugugc.....  | 1    | 1 | bc5 |
| .....uauacacagccagcuuugaugugc.....  | 8417 | 0 | bc5 |
| .....uauacacagccagcuuugCugugc.....  | 2    | 1 | bc5 |
| .....Aaucacagccagcuuugaugugc.....   | 1    | 1 | bc5 |
| .....uauacacagccGgcuuugaugugc.....  | 6    | 1 | bc5 |
| .....uauAacagccagcuuugaugugc.....   | 2    | 1 | bc5 |
| .....uCucacagccagcuuugaugugc.....   | 1    | 1 | bc5 |
| .....uauacacagccagcuuugUugugc.....  | 4    | 1 | bc5 |
| .....uauacacGgcccagcuuugaugugc..... | 2    | 1 | bc5 |
| .....uauacacagccagcuuugaugugA.....  | 16   | 1 | bc5 |
| .....uauacacagccagcuuUaugugc.....   | 3    | 1 | bc5 |
| .....uaucaUagccagcuuugaugugc.....   | 4    | 1 | bc5 |
| .....uaGcacagccagcuuugaugugc.....   | 1    | 1 | bc5 |
| .....uauacacagccagcuuugauguAc.....  | 4    | 1 | bc5 |
| .....uauacacagccagcuCugaugugc.....  | 1    | 1 | bc5 |
| .....uauacacCgcccagcuuugaugugc..... | 1    | 1 | bc5 |
| .....uauacacagccagcuuUaugugc.....   | 1    | 1 | bc5 |
| .....uauacacaUcccagcuuugaugugc..... | 2    | 1 | bc5 |
| .....uauacacagUcagcuuugaugugc.....  | 1    | 1 | bc5 |
| .....uauacacagccagGcuuugaugugc..... | 1    | 1 | bc5 |
| .....uauacacagccagcuuugauCugc.....  | 3    | 1 | bc5 |
| .....uauacacagccagcuuugaugCgc.....  | 3    | 1 | bc5 |
| .....uauacacagccagcuuugaugugU.....  | 48   | 1 | bc5 |
| .....uauacacagccagcuuugauguUc.....  | 2    | 1 | bc5 |
| .....uauacacagccagcuuUaugugc.....   | 3    | 1 | bc5 |
| .....uauacacagccaAcuuugaugugc.....  | 1    | 1 | bc5 |
| .....uaucaAagccagcuuugaugugc.....   | 1    | 1 | bc5 |
| .....uauacacaAccagcuuugaugugc.....  | 1    | 1 | bc5 |
| .....uauacacagcUagcuuugaugugc.....  | 3    | 1 | bc5 |
| .....uauacacagccagcuuugauguCc.....  | 3    | 1 | bc5 |
| .....uauacacagcAagcuuugaugugc.....  | 2    | 1 | bc5 |
| .....uauacacagccagcuuugaugGgcu..... | 1    | 1 | bc5 |
| .....uauacacagccagcuuugaugugcA..... | 12   | 1 | bc5 |
| .....uauacacagccagcuuugaugugcC..... | 1    | 1 | bc5 |
| .....uauacacagccagcuuugaugugcG..... | 5    | 1 | bc5 |
| .....uauacacagccagcuuugaugugcu..... | 79   | 0 | bc5 |
| .....aucacagccagcuuugaugug.....     | 1    | 0 | bc5 |
| .....aucacagccagcuuugaugugc.....    | 14   | 0 | bc5 |
| .....aucacagccagcuuugaugugA.....    | 1    | 1 | bc5 |
| .....aucacagccagcuuugaugugcu.....   | 2    | 0 | bc5 |
| .....aucacagccagcuuugaugugcC.....   | 1    | 1 | bc5 |
| .....ucacagccagcuuugaugugc.....     | 2    | 0 | bc5 |
| .....ucacagUcagcuuugaugugc.....     | 1    | 1 | bc5 |
| .....ucacagccagcuuugaugugcu.....    | 4    | 0 | bc5 |
| .....ucacagccagcuuugaugugUu.....    | 1    | 1 | bc5 |
| .....ucacagccagcuuugaugugcA.....    | 2    | 1 | bc5 |
| .....cacagccagcuuugaugug.....       | 2    | 0 | bc5 |
| .....acagccagcuuugaugug.....        | 5    | 0 | bc5 |
| .....acagAcagcuuugaugugc.....       | 1    | 1 | bc5 |
| .....acagccagcuuugaugugc.....       | 41   | 0 | bc5 |
| .....cagccagcuuugaugugc.....        | 9    | 0 | bc5 |

cel-miR-2\*

uaaacagauacagaaagccaucacaaagcgggugguugaugugugcaaaauuugacuuucauauacacagccagcuuugaugugcugccguugcacugu

|                                      |      |   |     |
|--------------------------------------|------|---|-----|
| .....caucacaaagcgggugguugau.....     | 2    | 0 | bc2 |
| .....caucacaaagcgggugguugaug.....    | 2    | 0 | bc2 |
| .....caucacaaagcgggugguugaugu.....   | 3    | 0 | bc2 |
| .....caucacaaaUcgggugguugaugu.....   | 1    | 1 | bc2 |
| .....caucacaaagcgggugguugaugug.....  | 3    | 0 | bc2 |
| .....caucacaaagcgggugguugaugugu..... | 1    | 0 | bc2 |
| .....aucacaaagcgggugguugaugug.....   | 2    | 0 | bc2 |
| .....Cuauacacagccagcuuugaugugc.....  | 1    | 1 | bc2 |
| .....uauacacagccagcuuuga.....        | 10   | 0 | bc2 |
| .....uauacacagccagcuuugau.....       | 1    | 0 | bc2 |
| .....uauacacagccagcuuugaug.....      | 11   | 0 | bc2 |
| .....uauacacagccagcuuugaugu.....     | 7    | 0 | bc2 |
| .....uauacacagccagcuuugauCu.....     | 1    | 1 | bc2 |
| .....uauacacaCccagcuuugaugug.....    | 1    | 1 | bc2 |
| .....uauacacagccagcuuugauguA.....    | 2    | 1 | bc2 |
| .....uauacacagAcagcuuugaugug.....    | 1    | 1 | bc2 |
| .....uauacacagccagcuuugauguU.....    | 11   | 1 | bc2 |
| .....uauacacagccagcuuugaugCg.....    | 1    | 1 | bc2 |
| .....uauacacagccagcuuugaugug.....    | 241  | 0 | bc2 |
| .....uauacacagccagcuuugauguC.....    | 3    | 1 | bc2 |
| .....uauacacCgccagcuuugaugugc.....   | 1    | 1 | bc2 |
| .....uauacacagccagcuuugaugGgc.....   | 11   | 1 | bc2 |
| .....uauacacagccagcCuugaugugc.....   | 3    | 1 | bc2 |
| .....uauacacagccagcuuugaGgugc.....   | 1    | 1 | bc2 |
| .....uauacacagccagcuuuUaugugc.....   | 1    | 1 | bc2 |
| .....uauacacagccagcuuugauguUc.....   | 1    | 1 | bc2 |
| .....uauacacagccagcuuugaugugU.....   | 15   | 1 | bc2 |
| .....uauGacagccagcuuugaugugc.....    | 1    | 1 | bc2 |
| .....uauacacagccagGuuugaugugc.....   | 1    | 1 | bc2 |
| .....uauacacagccagcuuugauguCc.....   | 2    | 1 | bc2 |
| .....uaucaUagccagcuuugaugugc.....    | 1    | 1 | bc2 |
| .....uauacacagccagcuuUcgaugugc.....  | 2    | 1 | bc2 |
| .....uauacacagccaCcuuugaugugc.....   | 1    | 1 | bc2 |
| .....uauacacagccagcuuugaugugc.....   | 3361 | 0 | bc2 |
| .....uauacacagcAagcuuugaugugc.....   | 3    | 1 | bc2 |
| .....uauacacagccagcuuugaugugA.....   | 13   | 1 | bc2 |
| .....uauacacagccagcuuugauCugc.....   | 4    | 1 | bc2 |
| .....Caucacagccagcuuugaugugc.....    | 2    | 1 | bc2 |
| .....uauacacagccCgcuuugaugugc.....   | 1    | 1 | bc2 |
| .....uauacacagccagcuuugGugugc.....   | 1    | 1 | bc2 |
| .....uauacacagcUagcuuugaugugc.....   | 1    | 1 | bc2 |
| .....uauacacagccagcuuugCugugc.....   | 1    | 1 | bc2 |
| .....uauacacaCccagcuuugaugugc.....   | 1    | 1 | bc2 |
| .....uauacacagccUgcuuugaugugc.....   | 1    | 1 | bc2 |
| .....uGucacagccagcuuugaugugc.....    | 1    | 1 | bc2 |
| .....uauacacagccagcuuugauUugc.....   | 1    | 1 | bc2 |
| .....uauacacagccagcuuugaugAgc.....   | 2    | 1 | bc2 |
| .....uauAacagccagcuuugaugugc.....    | 1    | 1 | bc2 |
| .....uaucaGagccagcuuugaugugc.....    | 1    | 1 | bc2 |
| .....uaucaAagccagcuuugaugugc.....    | 1    | 1 | bc2 |
| .....uauacacagccagcuuugaugCgc.....   | 1    | 1 | bc2 |
| .....uauacacagccGgcuuugaugugc.....   | 2    | 1 | bc2 |
| .....uauacacGgccagcuuugaugugc.....   | 3    | 1 | bc2 |
| .....uauacacagccagcuuugaugugG.....   | 9    | 1 | bc2 |
| .....uauacacagccagcuuugaugugcG.....  | 1    | 1 | bc2 |
| .....uauacacagccagcuuugaugugcu.....  | 40   | 0 | bc2 |
| .....uauacacagccagcuuugaugugUu.....  | 4    | 1 | bc2 |
| .....uauacacagccagcuuugaugugcC.....  | 1    | 1 | bc2 |
| .....uauacacagccagcuuugaugugcA.....  | 12   | 1 | bc2 |
| .....aucacagccagcuuugaugugc.....     | 6    | 0 | bc2 |
| .....aucacagccagcuuugaugugA.....     | 1    | 1 | bc2 |
| .....aucacagccagcuuugaugugcu.....    | 2    | 0 | bc2 |
| .....ucacagccagcuuugaugugc.....      | 1    | 0 | bc2 |
| .....acagccagcuuugaugug.....         | 1    | 0 | bc2 |
| .....acagccagcuuugaugugc.....        | 21   | 0 | bc2 |
| .....acagccagcuuuUaugugc.....        | 1    | 1 | bc2 |
| .....caucacaaagcgggugguugau.....     | 2    | 0 | bc7 |

cel-miR-2\*

uaaacagauacagaaagccaucacaaagcgggugaugugugugcaaaauaugacuucacaucaucagccagcucuugaugugcugccuguugcacugu

|                                      |      |   |     |
|--------------------------------------|------|---|-----|
| .....caucacaaagcgggugaug.....        | 26   | 0 | bc7 |
| .....caucacaaagcgggugaug.....        | 21   | 0 | bc7 |
| .....cUucaaaagcgggugaug.....         | 1    | 1 | bc7 |
| .....caucacaaagcgggugaug.....        | 6    | 0 | bc7 |
| .....uugcaaaauaugacuucac.....        | 1    | 0 | bc7 |
| .....Cuaucaacagccagcucuugauguc.....  | 1    | 1 | bc7 |
| .....uaucaacagccagcucuuga.....       | 8    | 0 | bc7 |
| .....uaucaacagccagcucuuga.....       | 1    | 0 | bc7 |
| .....uaucaUagccagcucuugaug.....      | 1    | 1 | bc7 |
| .....uaucaacagccagcucuugaug.....     | 44   | 0 | bc7 |
| .....uaucaacagccagcucuugaug.....     | 16   | 0 | bc7 |
| .....uaucaacagccagcucuugaugug.....   | 524  | 0 | bc7 |
| .....uaucaacagccagcucuugaugUC.....   | 2    | 1 | bc7 |
| .....uaucaacagccagcucuugaugUA.....   | 2    | 1 | bc7 |
| .....uaucaacagccagcucuugaugUG.....   | 4    | 1 | bc7 |
| .....uaucaacagccagcucuugaugUU.....   | 1    | 1 | bc7 |
| .....uaucaacagccagcucuugaugUU.....   | 12   | 1 | bc7 |
| .....uaucaacGgcccagcucuugaugug.....  | 1    | 1 | bc7 |
| .....uaucaUagccagcucuugaugug.....    | 1    | 1 | bc7 |
| .....uaucaCaCccagcucuugaugugc.....   | 1    | 1 | bc7 |
| .....uaucaacagccaUccuugaugugc.....   | 1    | 1 | bc7 |
| .....uaucaacagcUagcucuugaugugc.....  | 4    | 1 | bc7 |
| .....uaucaacagccagcucuugaugCgc.....  | 3    | 1 | bc7 |
| .....uaucaUagccagcucuugaugugc.....   | 3    | 1 | bc7 |
| .....uaucaacGgcccagcucuugaugugc..... | 2    | 1 | bc7 |
| .....uaucaacagccagcucuugaugugc.....  | 2    | 1 | bc7 |
| .....uaucaacagccagcucuugaugugc.....  | 1    | 1 | bc7 |
| .....uaucaacagcAagcucuugaugugc.....  | 2    | 1 | bc7 |
| .....uaucaacagccGgcuugaugugc.....    | 6    | 1 | bc7 |
| .....uauAacagccagcucuugaugugc.....   | 1    | 1 | bc7 |
| .....uaucaacagccagcucuugaugugc.....  | 4    | 1 | bc7 |
| .....uaucaacCgcccagcucuugaugugc..... | 1    | 1 | bc7 |
| .....uaucaacagccagcucuugaAgugc.....  | 2    | 1 | bc7 |
| .....uaucaacagccagcucuugUugugc.....  | 3    | 1 | bc7 |
| .....uaucaUcagccagcucuugaugugc.....  | 1    | 1 | bc7 |
| .....uaucaacagccagcucuCaugugc.....   | 2    | 1 | bc7 |
| .....uaucaacagccagcucuugaugugc.....  | 8093 | 0 | bc7 |
| .....uaucaCaAccagcucuugaugugc.....   | 2    | 1 | bc7 |
| .....uaucaacagccagcucuugGugugc.....  | 1    | 1 | bc7 |
| .....Caucacagccagcucuugaugugc.....   | 2    | 1 | bc7 |
| .....uaucaacagccagcucuugCugugc.....  | 1    | 1 | bc7 |
| .....uaucaacagccCgcuugaugugc.....    | 2    | 1 | bc7 |
| .....uaucaacagccagcucuugaugugU.....  | 40   | 1 | bc7 |
| .....uauAacagccagcucuugaugugc.....   | 2    | 1 | bc7 |
| .....uaucaacagccagcucuugaCgugc.....  | 1    | 1 | bc7 |
| .....uaucaacagccagcucuugaugugc.....  | 2    | 1 | bc7 |
| .....uaucaacagccagcucuugaugugUA..... | 17   | 1 | bc7 |
| .....uaucaacagccagcucuugaUaugc.....  | 7    | 1 | bc7 |
| .....uaucaacagccagcCUugaugugc.....   | 4    | 1 | bc7 |
| .....uauUacagccagcucuugaugugc.....   | 2    | 1 | bc7 |
| .....uaucaacagccagcucuugauguUc.....  | 3    | 1 | bc7 |
| .....uaucaacagccagcucuugaugAgc.....  | 2    | 1 | bc7 |
| .....uaucaacagccagcucuUaugugc.....   | 6    | 1 | bc7 |
| .....uaucaCaUccagcucuugaugugc.....   | 1    | 1 | bc7 |
| .....uaucaacagccagcAUugaugugc.....   | 1    | 1 | bc7 |
| .....uaucaacagccagcucuugaUugc.....   | 6    | 1 | bc7 |
| .....uaucaacagccagcucuugauguCc.....  | 3    | 1 | bc7 |
| .....uaucaAagccagcucuugaugugc.....   | 2    | 1 | bc7 |
| .....uaucaacagccagcucuugaGgugc.....  | 3    | 1 | bc7 |
| .....uaucaacagccagcucuugaugGgc.....  | 22   | 1 | bc7 |
| .....uaucaacagccagcucuugauguAc.....  | 2    | 1 | bc7 |
| .....uaucaCagccagcucuugaugugc.....   | 1    | 1 | bc7 |
| .....uaucaacagccagcucuugaugugG.....  | 63   | 1 | bc7 |
| .....uaucaacagccagcucuugaugugc.....  | 1    | 1 | bc7 |
| .....uaucaacagccagcucuugaUugc.....   | 3    | 1 | bc7 |
| .....uaucaacagAcagcucuugaugugc.....  | 2    | 1 | bc7 |
| .....uaucaacagccagcucuugaugugc.....  | 2    | 1 | bc7 |
| .....uGucacagccagcucuugaugugc.....   | 2    | 1 | bc7 |
| .....uaucaacagccagcucuugaugugc.....  | 3    | 1 | bc7 |



cel-miR-2

cel-miR-2\*

uaaacagauacagaaaagccaucaaaagcgggguugauguguugcaaauuaugacuucauaucacagccagcuugaugugcugccugugcacugu

|                                                             |    |   |     |
|-------------------------------------------------------------|----|---|-----|
| .....uau <u>c</u> Gcagccagcuu <u>g</u> augugc.....          | 6  | 1 | bc7 |
| .....uau <u>c</u> acagccagcuu <u>g</u> augugcA.....         | 7  | 1 | bc7 |
| .....uau <u>c</u> acagccagcuu <u>g</u> augugcC.....         | 1  | 1 | bc7 |
| .....uau <u>c</u> acagccagcuu <u>g</u> augugcG.....         | 4  | 1 | bc7 |
| .....uau <u>c</u> acagccagcuu <u>g</u> augug <u>U</u> ..... | 3  | 1 | bc7 |
| .....uau <u>c</u> acagccagcuu <u>g</u> augug <u>c</u> ..... | 74 | 0 | bc7 |
| .....au <u>c</u> acagccagcuu <u>g</u> augug.....            | 1  | 0 | bc7 |
| .....au <u>c</u> acagccagcuu <u>g</u> augugc.....           | 14 | 0 | bc7 |
| .....au <u>c</u> acagccagcuu <u>g</u> augug <u>c</u> .....  | 4  | 0 | bc7 |
| .....u <u>c</u> acagccagcuu <u>g</u> augugc.....            | 3  | 0 | bc7 |
| .....u <u>c</u> acagccagcuu <u>g</u> augug <u>c</u> .....   | 1  | 0 | bc7 |
| .....u <u>c</u> acagccagcuu <u>g</u> augugcC.....           | 1  | 1 | bc7 |
| .....a <u>c</u> agccagcuu <u>g</u> augCg.....               | 1  | 1 | bc7 |
| .....a <u>c</u> agccagcuu <u>g</u> augug.....               | 1  | 0 | bc7 |
| .....a <u>c</u> agccagcuu <u>g</u> augugG.....              | 1  | 1 | bc7 |
| .....a <u>c</u> agccagcuu <u>g</u> augugc.....              | 41 | 0 | bc7 |
| .....cagccagcuu <u>g</u> augugc.....                        | 8  | 0 | bc7 |
