# Supplementary material for: Reliable reference miRNAs for quantitative gene expression analysis of stress responses in Caenorhabditis elegans
Source: PubMed Central journal article supplement (PMC3997968; doi:10.1186/1471-2164-15-222), 2014-03-21
Supplement: 1471-2164-15-222-S5.pdf [file 1471-2164-15-222-S5.pdf]

cugaggugaagcugaagagagccgucuaauugacaguucaagaccacagagucguugugugcugucugcauggagucgcucucucucagaugaucggucaau

|                                                             |      |   |     |
|-------------------------------------------------------------|------|---|-----|
| .....ucaagaccacgagucguugugugcuCu.....                       | 1    | 1 | bc4 |
| .....ucaagaccacgagucguugugugcugucaugga.....                 | 1    | 0 | bc4 |
| .....ucaagaccacgagucguugugugcugucugcauggagucgcucucuuca..... | 3    | 0 | bc4 |
| .....ucaagaccacUagucguugugugcugucugcauggagucgcucucuuca..... | 1    | 1 | bc4 |
| .....aagaccacgagucguugugugcugucugcauggagucgcucucuuca.....   | 1    | 0 | bc4 |
| .....cugucauggagucgcucucuu.....                             | 1    | 0 | bc4 |
| .....cugucauggagucgcucucuuU.....                            | 1    | 1 | bc4 |
| .....cugucauggagucgcucucuuca.....                           | 10   | 0 | bc4 |
| .....cugucauggagGcgcucucuuca.....                           | 3    | 1 | bc4 |
| .....ugucauggagGcgcucuc.....                                | 3    | 1 | bc4 |
| .....ugucauggagucgcucuc.....                                | 6    | 0 | bc4 |
| .....ugucauggagGcgcucuc.....                                | 26   | 1 | bc4 |
| .....ugucauggagucgcucuc.....                                | 7    | 0 | bc4 |
| .....ugucauggagAcgcucucuu.....                              | 1    | 1 | bc4 |
| .....ugucauggagucgcucucG.....                               | 1    | 1 | bc4 |
| .....ugucauggaguAgcucucuu.....                              | 2    | 1 | bc4 |
| .....ugucauggagucgcucucuu.....                              | 130  | 0 | bc4 |
| .....ugucauggagGcgcucucuu.....                              | 234  | 1 | bc4 |
| .....ugucauggagCcgucucuu.....                               | 1    | 1 | bc4 |
| .....ugucauggagucgcucucuuC.....                             | 78   | 0 | bc4 |
| .....ugucauggagucgcucucuuU.....                             | 1    | 1 | bc4 |
| .....ugucauggagGcgcucucuuC.....                             | 93   | 1 | bc4 |
| .....ugucauggagCcgucucuuC.....                              | 1    | 1 | bc4 |
| .....Cgucauggagucgcucucuuca.....                            | 2    | 1 | bc4 |
| .....ugucauggaguGgcucucuuca.....                            | 1    | 1 | bc4 |
| .....ugucauggagucgcucucuuca.....                            | 5628 | 0 | bc4 |
| .....ugucauggagucgcucuuAuuca.....                           | 5    | 1 | bc4 |
| .....ugucauggaUucgcucucuuca.....                            | 1    | 1 | bc4 |
| .....ugucauggagucgcucucGca.....                             | 8    | 1 | bc4 |
| .....ugucauggagucGucucuuca.....                             | 1    | 1 | bc4 |
| .....ugucauggagucUcucucuuca.....                            | 5    | 1 | bc4 |
| .....ugucauggagucgcucucuuC.....                             | 10   | 1 | bc4 |
| .....ugucauUgagucgcucucuuca.....                            | 4    | 1 | bc4 |
| .....ugucauggagucgcCucucuuca.....                           | 1    | 1 | bc4 |
| .....ugucauggagucGUcucuuca.....                             | 1    | 1 | bc4 |
| .....ugucaugAagucgcucucuuca.....                            | 1    | 1 | bc4 |
| .....ugucauggagucgcucucuuAca.....                           | 7    | 1 | bc4 |
| .....ugucaugUagucgcucucuuca.....                            | 1    | 1 | bc4 |
| .....ugucGuggagucgcucucuuca.....                            | 2    | 1 | bc4 |
| .....ugucauggagAcgcucucuuca.....                            | 4    | 1 | bc4 |
| .....ugucauggGgucgcucucuuca.....                            | 5    | 1 | bc4 |
| .....ugucauggagCcgucucuuca.....                             | 8    | 1 | bc4 |
| .....ugucauggagucgcucGucuuca.....                           | 1    | 1 | bc4 |
| .....ugucGauggagucgcucucuuca.....                           | 2    | 1 | bc4 |
| .....ugucaCggagucgcucucuuca.....                            | 2    | 1 | bc4 |
| .....ugucUauggagucgcucucuuca.....                           | 1    | 1 | bc4 |
| .....ugucauAagucgcucucuuca.....                             | 1    | 1 | bc4 |
| .....ugucauggagGcgcucucuuca.....                            | 1930 | 1 | bc4 |
| .....ugucauggaAucgcucucuuca.....                            | 1    | 1 | bc4 |
| .....ugucaugGcgucgcucucuuca.....                            | 2    | 1 | bc4 |
| .....Ggucauggagucgcucucuuca.....                            | 2    | 1 | bc4 |
| .....ugucauggagucgcucucuuG.....                             | 10   | 1 | bc4 |
| .....ugucauggagucCucucuuca.....                             | 3    | 1 | bc4 |
| .....ugucauggagucgcucCcuca.....                             | 2    | 1 | bc4 |
| .....ugucaugCagucgcucucuuca.....                            | 1    | 1 | bc4 |
| .....ugucauggagucgcucucCca.....                             | 5    | 1 | bc4 |
| .....ugucauggagucgcucucCuca.....                            | 2    | 1 | bc4 |
| .....ugucauggagucgcucuuUuca.....                            | 2    | 1 | bc4 |
| .....ugAcauggagucgcucucuuca.....                            | 1    | 1 | bc4 |
| .....ugucUuggagucgcucucuuca.....                            | 1    | 1 | bc4 |
| .....ugucauggagucgcucucuuGa.....                            | 1    | 1 | bc4 |
| .....ugGcauggagucgcucucuuca.....                            | 1    | 1 | bc4 |
| .....ugucauggagucgcuuAucuuca.....                           | 1    | 1 | bc4 |
| .....ugucauggaguAgcucucuuca.....                            | 4    | 1 | bc4 |
| .....ugucauggagucgcuuUucuuca.....                           | 5    | 1 | bc4 |
| .....ugucauggagucAcucucuuca.....                            | 1    | 1 | bc4 |
| .....ugucauggUgucgcucucuuca.....                            | 1    | 1 | bc4 |
| .....uUucauggagucgcucucuuca.....                            | 1    | 1 | bc4 |
| .....ugucauggaguUgucucucuuca.....                           | 4    | 1 | bc4 |

cugaggugaagcugaagagagccgcgucuaauugacaguucaagaccacgagucguugugugcugucauggagucgcucucuucagauccggucaau

|                                                         |      |   |     |
|---------------------------------------------------------|------|---|-----|
| .....ugucauggagucgAucucuca.....                         | 1    | 1 | bc4 |
| .....ugucauggagucgcucucuucU.....                        | 394  | 1 | bc4 |
| .....ugucauggagucgcucucucaC.....                        | 1    | 1 | bc4 |
| .....ugucauggagucgcucucucaU.....                        | 46   | 1 | bc4 |
| .....ugucauggagucgcucucuucag.....                       | 3    | 0 | bc4 |
| .....ugucauggagucgcucucucaA.....                        | 3    | 1 | bc4 |
| .....ugucauggagucgcucucucaAa.....                       | 1    | 1 | bc4 |
| .....gucauggagucgcucucuca.....                          | 8    | 0 | bc4 |
| .....gucauggagGcgcucucuca.....                          | 3    | 1 | bc4 |
| .....gucauggagucgcucucuucU.....                         | 1    | 1 | bc4 |
| .....ucauggagucgcucucuca.....                           | 1    | 0 | bc4 |
| .....auggagucgcucucuca.....                             | 3    | 0 | bc4 |
| .....auggagGcgcucucuca.....                             | 1    | 1 | bc4 |
| .....gcugaagagagccgcgucuaauugacagu.....                 | 1    | 0 | bc1 |
| .....aagagagccgcgucuaauugac.....                        | 1    | 0 | bc1 |
| .....aagagagcAgucuaauugaca.....                         | 1    | 1 | bc1 |
| .....aagagagccgcgucuaauugacag.....                      | 73   | 0 | bc1 |
| .....aagagagcAgucuaauugacag.....                        | 42   | 1 | bc1 |
| .....aagagagccgcgucuaauugacCg.....                      | 1    | 1 | bc1 |
| .....aagagagccgcgucuaauugacGgu.....                     | 1    | 1 | bc1 |
| .....aaUagagccgcgucuaauugacagu.....                     | 1    | 1 | bc1 |
| .....aagagagccgcgucuaauugacaCu.....                     | 1    | 1 | bc1 |
| .....aagagUgccgcgucuaauugacagu.....                     | 1    | 1 | bc1 |
| .....aagagagUcgcgucuaauugacagu.....                     | 2    | 1 | bc1 |
| .....aagagagccgcgucuaauugacaUu.....                     | 1    | 1 | bc1 |
| .....aagagagccgcgucuauCgacagu.....                      | 1    | 1 | bc1 |
| .....aagagagccgcgucuaauugacagu.....                     | 1238 | 0 | bc1 |
| .....aagagaCccgcgucuaauugacagu.....                     | 1    | 1 | bc1 |
| .....aagagaUccgcgucuaauugacagu.....                     | 1    | 1 | bc1 |
| .....aagagGgccgcgucuaauugacagu.....                     | 1    | 1 | bc1 |
| .....aagagagccgcgucuaCugacagu.....                      | 2    | 1 | bc1 |
| .....Uagagagccgcgucuaauugacagu.....                     | 1    | 1 | bc1 |
| .....aagagagcAgucuaauugacagu.....                       | 786  | 1 | bc1 |
| .....aagagagccgcgucuaauugacagC.....                     | 1    | 1 | bc1 |
| .....aagagagccgcgucuaauAacagu.....                      | 1    | 1 | bc1 |
| .....aagagagccgcgucuaauugacagG.....                     | 4    | 1 | bc1 |
| .....aagagagccAucuaauugacagu.....                       | 2    | 1 | bc1 |
| .....aagagagcAgucuaauugacaguu.....                      | 16   | 1 | bc1 |
| .....aagagagccgcgucuaauugacaguu.....                    | 16   | 0 | bc1 |
| .....agagagccgcgucuaauugacagu.....                      | 15   | 0 | bc1 |
| .....agagagcAgucuaauugacagu.....                        | 1    | 1 | bc1 |
| .....agagagccgcgucuaauugacaguu.....                     | 1    | 0 | bc1 |
| .....gagagccgcgucuaauugacagu.....                       | 1    | 0 | bc1 |
| .....gagcAgucuaauugacagu.....                           | 3    | 1 | bc1 |
| .....gagccgcgucuaauugacagu.....                         | 1    | 0 | bc1 |
| .....gaCccgcgucuaauugacagu.....                         | 1    | 1 | bc1 |
| .....ucaagaccacgagucguugugugc.....                      | 1    | 0 | bc1 |
| .....ucaaUaccacgagucguugugugc.....                      | 1    | 1 | bc1 |
| .....ucaagaccacgagucguugugugc.....                      | 3    | 0 | bc1 |
| .....ucaagaccacgagucguugugugcugucauggagucgcucucuca..... | 1    | 0 | bc1 |
| .....cugucauggagGcgcucucuca.....                        | 2    | 1 | bc1 |
| .....cugucauggagucgcucucuca.....                        | 5    | 0 | bc1 |
| .....cugucauggagucgcucucuucU.....                       | 1    | 1 | bc1 |
| .....ugucauggagGcgcucuc.....                            | 4    | 1 | bc1 |
| .....ugucauggagucgcucuc.....                            | 5    | 0 | bc1 |
| .....ugucauggagucgcucuc.....                            | 1    | 1 | bc1 |
| .....ugucauggagucgcucuc.....                            | 6    | 0 | bc1 |
| .....ugucauggagGcgcucuc.....                            | 24   | 1 | bc1 |
| .....ugucaGggagucgcucucuu.....                          | 1    | 1 | bc1 |
| .....ugucauggagucgcucucG.....                           | 1    | 1 | bc1 |
| .....uAucauggagucgcucucuu.....                          | 1    | 1 | bc1 |
| .....ugucauggGgucgcucucuu.....                          | 1    | 1 | bc1 |
| .....ugucauggagGcgcucucuu.....                          | 238  | 1 | bc1 |
| .....ugucauggagucgcucucuu.....                          | 143  | 0 | bc1 |
| .....Cgucauggagucgcucucuc.....                          | 1    | 1 | bc1 |
| .....ugucauggagucgcucucuc.....                          | 67   | 0 | bc1 |
| .....ugucauggagucgcucCcuuc.....                         | 1    | 1 | bc1 |
| .....ugucauggaUcgcucucuc.....                           | 1    | 1 | bc1 |

cugaggugaagcugaagagagccgucuaauugacaguucaagaccacgagucguugugugcugucauggagucgcucucuucagauccggucaau

|                                     |      |   |     |
|-------------------------------------|------|---|-----|
| .....ugucauggagGcgcucucuuc.....     | 155  | 1 | bc1 |
| .....ugucauggagucgcucucuU.....      | 1    | 1 | bc1 |
| .....ugucauggagucgcucucCuca.....    | 1    | 1 | bc1 |
| .....ugucauggagucgAucucuuca.....    | 3    | 1 | bc1 |
| .....ugucauggaCucgcucucuuca.....    | 1    | 1 | bc1 |
| .....ugucauggTgucgcucucuuca.....    | 2    | 1 | bc1 |
| .....ugucauggagucgcucucuAca.....    | 4    | 1 | bc1 |
| .....ugGcauggagucgcucucuuca.....    | 1    | 1 | bc1 |
| .....ugucauggagucgcucucuucC.....    | 12   | 1 | bc1 |
| .....uCucauggagucgcucucuuca.....    | 1    | 1 | bc1 |
| .....ugucauggagucgcucucuGca.....    | 3    | 1 | bc1 |
| .....ugucauggagucgcCccucuuca.....   | 2    | 1 | bc1 |
| .....uUucauggagucgcucucuuca.....    | 1    | 1 | bc1 |
| .....ugucauggagucgcGcucuuca.....    | 1    | 1 | bc1 |
| .....ugucauggagucgcucucuucG.....    | 7    | 1 | bc1 |
| .....uguAauggagucgcucucuuca.....    | 2    | 1 | bc1 |
| .....ugucauggagucgcucucuuca.....    | 7108 | 0 | bc1 |
| .....ugucauggagucCccucuuca.....     | 2    | 1 | bc1 |
| .....ugucauggagGcgcucucuuca.....    | 2911 | 1 | bc1 |
| .....ugucauggagAcgucucuuca.....     | 4    | 1 | bc1 |
| .....ugucauggagucgcucucuUa.....     | 5    | 1 | bc1 |
| .....ugucaCggagucgcucucuuca.....    | 1    | 1 | bc1 |
| .....ugucauggaUucgcucucuuca.....    | 2    | 1 | bc1 |
| .....Agucauggagucgcucucuuca.....    | 3    | 1 | bc1 |
| .....ugucauggagucgUucucuuca.....    | 5    | 1 | bc1 |
| .....ugucauggagucgcucucuCca.....    | 6    | 1 | bc1 |
| .....ugucauggaAucgcucucuuca.....    | 2    | 1 | bc1 |
| .....uguUauggagucgcucucuuca.....    | 4    | 1 | bc1 |
| .....ugucauggagucgcUucucuuca.....   | 1    | 1 | bc1 |
| .....ugucauggagucUcucucuuca.....    | 3    | 1 | bc1 |
| .....ugucauggagucgcUucucuuca.....   | 2    | 1 | bc1 |
| .....ugucauAagucgcucucuuca.....     | 2    | 1 | bc1 |
| .....ugucauggGgucgcucucuuca.....    | 6    | 1 | bc1 |
| .....ugucauggaguAgcucucuuca.....    | 6    | 1 | bc1 |
| .....ugucauggaguGgcucucuuca.....    | 1    | 1 | bc1 |
| .....ugucauggagCcgucucuuca.....     | 13   | 1 | bc1 |
| .....ugucauggagucgcucUucucuuca..... | 2    | 1 | bc1 |
| .....ugucauggagucgcucucuucU.....    | 480  | 1 | bc1 |
| .....ugucauggCgucgcucucuuca.....    | 3    | 1 | bc1 |
| .....ugucauggagucgcucAucuuca.....   | 1    | 1 | bc1 |
| .....ugucaugCagucgcucucuuca.....    | 1    | 1 | bc1 |
| .....Cgucauggagucgcucucuuca.....    | 1    | 1 | bc1 |
| .....ugucCuggagucgcucucuuca.....    | 1    | 1 | bc1 |
| .....ugucauggagucgcucUucucuuca..... | 2    | 1 | bc1 |
| .....ugucGuggagucgcucucuuca.....    | 3    | 1 | bc1 |
| .....ugucauggagucgcucCcuuca.....    | 2    | 1 | bc1 |
| .....uAucauggagucgcucucuuca.....    | 1    | 1 | bc1 |
| .....ugucauggaguUgcucucuuca.....    | 3    | 1 | bc1 |
| .....ugucUuggagucgcucucuuca.....    | 1    | 1 | bc1 |
| .....ugucauggagucgcucUucucuuca..... | 1    | 1 | bc1 |
| .....ugucaugAagucgcucucuuca.....    | 2    | 1 | bc1 |
| .....ugucauggagucAcucucuuca.....    | 5    | 1 | bc1 |
| .....ugucaugUagucgcucucuuca.....    | 3    | 1 | bc1 |
| .....ugAcauggagucgcucucuuca.....    | 1    | 1 | bc1 |
| .....ugucauggagucgcucucuucaA.....   | 6    | 1 | bc1 |
| .....ugucauggagucgcucucuucaU.....   | 36   | 1 | bc1 |
| .....ugucauggagucgcucucuucaC.....   | 2    | 1 | bc1 |
| .....gucauggagucgcucucuuc.....      | 1    | 0 | bc1 |
| .....gucauggagGcgcucucuuca.....     | 3    | 1 | bc1 |
| .....gucauggagucgcucucuuca.....     | 15   | 0 | bc1 |
| .....gucauggagucgcucucuucU.....     | 1    | 1 | bc1 |
| .....ucauggagucgcucucuuca.....      | 1    | 0 | bc1 |
| .....ucauggagGcgcucucuucaga.....    | 1    | 1 | bc1 |
| .....auggagGcgcucucuuca.....        | 3    | 1 | bc1 |
| .....auggagucgcucucuuca.....        | 2    | 0 | bc1 |
| .....Caagagagccgucuaauugacagu.....  | 4    | 1 | bc3 |
| .....aagagagccgucuaauugac.....      | 2    | 0 | bc3 |
| .....aagagagccgucuaauugaca.....     | 1    | 0 | bc3 |

cugaggugaagcugaagagagcccgucuaauugacaguucaagaccacgagucguugugugcugucauggagucgcucucuucagaugauccggucaau

|                                                          |      |   |     |
|----------------------------------------------------------|------|---|-----|
| .....aagagagcAgucuaauugaca.....                          | 1    | 1 | bc3 |
| .....aagagagcccgucuaauugCcag.....                        | 1    | 1 | bc3 |
| .....aagagagcAgucuaauugacag.....                         | 67   | 1 | bc3 |
| .....aagagagcccgucuuugacag.....                          | 1    | 1 | bc3 |
| .....aagagagcccgucuaauugacGg.....                        | 1    | 1 | bc3 |
| .....aagagagcccgucuaauugacag.....                        | 203  | 0 | bc3 |
| .....aagagagcGgucuaauugacag.....                         | 1    | 1 | bc3 |
| .....aagagagcAgucuaauugacagu.....                        | 1096 | 1 | bc3 |
| .....aagagagcccgucuaauugacagu.....                       | 2684 | 0 | bc3 |
| .....aagagagcccgucuaauugaUagu.....                       | 1    | 1 | bc3 |
| .....aagagagcccgucuaUGacagau.....                        | 1    | 1 | bc3 |
| .....aagagagcccgucuaauugaAagu.....                       | 2    | 1 | bc3 |
| .....aaUagagcccgucuaauugacag.....                        | 2    | 1 | bc3 |
| .....aagagagcccgucuaauugacCgu.....                       | 1    | 1 | bc3 |
| .....aagagagcccgucuaauugacaAu.....                       | 2    | 1 | bc3 |
| .....Uagagagcccgucuaauugacagu.....                       | 2    | 1 | bc3 |
| .....aagagaAccgucuaauugacagu.....                        | 1    | 1 | bc3 |
| .....aagagaUccgucuaauugacagu.....                        | 2    | 1 | bc3 |
| .....aagagagcccgucuaauugacagG.....                       | 6    | 1 | bc3 |
| .....aagagUgcccgucuaauugacagu.....                       | 1    | 1 | bc3 |
| .....Cagagagcccgucuaauugacagu.....                       | 1    | 1 | bc3 |
| .....aagagagcccgucuaauugacagu.....                       | 2    | 1 | bc3 |
| .....aagagagcccgucuaUGacagau.....                        | 1    | 1 | bc3 |
| .....aagagagcccgucuaauuAacagu.....                       | 2    | 1 | bc3 |
| .....aaCagagcccgucuaauugacagu.....                       | 1    | 1 | bc3 |
| .....aagagagcccgucuaauugacagu.....                       | 4    | 1 | bc3 |
| .....aagagagcccgucuaauugGcagu.....                       | 1    | 1 | bc3 |
| .....aagagagcccgucuaauugacagC.....                       | 1    | 1 | bc3 |
| .....aagagagcccgucuaauugacagu.....                       | 5    | 1 | bc3 |
| .....aGgagagcccgucuaauugacagu.....                       | 1    | 1 | bc3 |
| .....aagagagcccgucuaauUacagu.....                        | 1    | 1 | bc3 |
| .....aagaUagcccgucuaauugacagu.....                       | 1    | 1 | bc3 |
| .....aagagagcccgucuaauugacaCu.....                       | 1    | 1 | bc3 |
| .....aagagagcccgucuaauugacGgu.....                       | 6    | 1 | bc3 |
| .....aagagagcccgucuaauugacUgu.....                       | 1    | 1 | bc3 |
| .....aagagagcUgucuaauugacagu.....                        | 1    | 1 | bc3 |
| .....aagaAagcccgucuaauugacagu.....                       | 1    | 1 | bc3 |
| .....aagagagcAgucuaauugacaguu.....                       | 17   | 1 | bc3 |
| .....aagagagcccgucuaauugacaguu.....                      | 32   | 0 | bc3 |
| .....aagagagcccgucuuugacaguu.....                        | 1    | 1 | bc3 |
| .....aagagagcccgucuaauugacaguuU.....                     | 4    | 1 | bc3 |
| .....agagagcccgucuaauugacag.....                         | 3    | 0 | bc3 |
| .....agagagcccgucuaauugacagu.....                        | 22   | 0 | bc3 |
| .....agagagcAgucuaauugacagu.....                         | 1    | 1 | bc3 |
| .....agagagcccgucuaauugacaguu.....                       | 1    | 0 | bc3 |
| .....Aagagcccgucuaauugacagu.....                         | 1    | 1 | bc3 |
| .....gagagcccgucuaauugacagu.....                         | 1    | 0 | bc3 |
| .....agagcAgucuaauugacagu.....                           | 1    | 1 | bc3 |
| .....gagccgucuaauugacagu.....                            | 4    | 0 | bc3 |
| .....gagcAgucuaauugacagu.....                            | 2    | 1 | bc3 |
| .....ucaaagaccacgagucguugugugc.....                      | 5    | 0 | bc3 |
| .....ucaaagaccacgagucguugugugcu.....                     | 4    | 0 | bc3 |
| .....ucaaagaccacgagucguugugugcuU.....                    | 2    | 1 | bc3 |
| .....ucaaagaccacgagucguugugugcugu.....                   | 1    | 0 | bc3 |
| .....ucaaagaccacgagucguugugugcuUu.....                   | 1    | 1 | bc3 |
| .....ucaaagaccacgagucguugugugcugucauggagucgcucucuuc..... | 2    | 0 | bc3 |
| .....cugucauggagucgcucucuuc.....                         | 1    | 0 | bc3 |
| .....cugucauggagGcgcucucuuc.....                         | 1    | 1 | bc3 |
| .....cugucauggagGcgcucucuuc.....                         | 2    | 1 | bc3 |
| .....cugucauggagucgcucucAuca.....                        | 1    | 1 | bc3 |
| .....cugucauggagucgcucucuuc.....                         | 10   | 0 | bc3 |
| .....cugucauggagucgcucucuucU.....                        | 3    | 1 | bc3 |
| .....ugucauggagucgcucuc.....                             | 15   | 0 | bc3 |
| .....ugucauggagGcgcucuc.....                             | 10   | 1 | bc3 |
| .....ugucauggagucgcucucA.....                            | 1    | 1 | bc3 |
| .....ugucauggagucgcucuc.....                             | 27   | 0 | bc3 |
| .....ugucauggagGcgcucuc.....                             | 74   | 1 | bc3 |
| .....ugucauggagucgcucucAu.....                           | 1    | 1 | bc3 |
| .....ugucauggagCgcgcucucu.....                           | 3    | 1 | bc3 |

cugaggugaagcugaagagagccgucuaauugacaguucaagaccacagagucguugugugcugucauggagucgcucucuucagauccggucaau

|                                   |       |   |     |
|-----------------------------------|-------|---|-----|
| .....ugucauggagAagcucucuu.....    | 1     | 1 | bc3 |
| .....ugucauggaguAagcucucuu.....   | 1     | 1 | bc3 |
| .....ugucauggagucgcucucuG.....    | 1     | 1 | bc3 |
| .....ugucauggagucgcucuuAuu.....   | 1     | 1 | bc3 |
| .....ugucauggagGagcucucuu.....    | 569   | 1 | bc3 |
| .....ugucauggagucgcucucuu.....    | 385   | 0 | bc3 |
| .....ugucUuggagucgcucucuu.....    | 1     | 1 | bc3 |
| .....ugucauggagucgcucucuuU.....   | 1     | 1 | bc3 |
| .....ugucauggagucgcucucuu.....    | 172   | 0 | bc3 |
| .....ugucauggagucgcucucuGc.....   | 1     | 1 | bc3 |
| .....ugucauAagucgcucucuu.....     | 1     | 1 | bc3 |
| .....ugucauggagGagcucucuu.....    | 303   | 1 | bc3 |
| .....ugucauggagucGucucuuca.....   | 2     | 1 | bc3 |
| .....ugucauggaUucgcucucuuca.....  | 4     | 1 | bc3 |
| .....ugucauggagucgcucuuAa.....    | 8     | 1 | bc3 |
| .....ugucauggagucGaucucuuca.....  | 5     | 1 | bc3 |
| .....ugucGauggagucgcucucuuca..... | 2     | 1 | bc3 |
| .....ugucauggagucGucucuuca.....   | 1     | 1 | bc3 |
| .....ugucauggGgucgcucucuuca.....  | 8     | 1 | bc3 |
| .....ugucauUgagucgcucucuuca.....  | 6     | 1 | bc3 |
| .....ugucauAagucgcucucuuca.....   | 3     | 1 | bc3 |
| .....ugucGuggagucgcucucuuca.....  | 4     | 1 | bc3 |
| .....ugucauggagucgcucuuGa.....    | 3     | 1 | bc3 |
| .....ugucauggagucgcucucuCca.....  | 11    | 1 | bc3 |
| .....ugucCuggagucgcucucuuca.....  | 1     | 1 | bc3 |
| .....uUucauggagucgcucucuuca.....  | 5     | 1 | bc3 |
| .....ugucauggagucgcucucuAca.....  | 11    | 1 | bc3 |
| .....ugucauggagucgcCcuucuuca..... | 2     | 1 | bc3 |
| .....ugucauggagucgcucCcuuca.....  | 4     | 1 | bc3 |
| .....ugucauggagucgcucucuuC.....   | 36    | 1 | bc3 |
| .....ugucauggagucgcucucuuUa.....  | 9     | 1 | bc3 |
| .....ugucauggagucgcucGucuuca..... | 1     | 1 | bc3 |
| .....ugucaugUagucgcucucuuca.....  | 4     | 1 | bc3 |
| .....ugucauggaguGgcucucuuca.....  | 1     | 1 | bc3 |
| .....ugucauggagucgcGcucuuca.....  | 1     | 1 | bc3 |
| .....ugucauggagucgcucucuGca.....  | 5     | 1 | bc3 |
| .....ugucauggaCucgcucucuuca.....  | 2     | 1 | bc3 |
| .....ugucauggagucgcucuuAuca.....  | 7     | 1 | bc3 |
| .....ugucauggagAagcucucuuca.....  | 10    | 1 | bc3 |
| .....ugAcauggagucgcucucuuca.....  | 7     | 1 | bc3 |
| .....ugucauggagucgcucGcuuca.....  | 1     | 1 | bc3 |
| .....ugucauggagGagcucucuuca.....  | 4629  | 1 | bc3 |
| .....ugucUauggagucgcucucuuca..... | 3     | 1 | bc3 |
| .....Cgucauggagucgcucucuuca.....  | 3     | 1 | bc3 |
| .....ugucauggagucgcucucuuG.....   | 18    | 1 | bc3 |
| .....ugucauggCgucgcucucuuca.....  | 1     | 1 | bc3 |
| .....uAucauggagucgcucucuuca.....  | 4     | 1 | bc3 |
| .....ugucauggagucgcucuuUuca.....  | 1     | 1 | bc3 |
| .....ugGcauggagucgcucucuuca.....  | 4     | 1 | bc3 |
| .....ugucUuggagucgcucucuuca.....  | 1     | 1 | bc3 |
| .....ugucauggaAucgcucucuuca.....  | 2     | 1 | bc3 |
| .....ugucauggaguAagcucucuuca..... | 2     | 1 | bc3 |
| .....ugucaugAagucgcucucuuca.....  | 1     | 1 | bc3 |
| .....ugucauggagucgcucucCuca.....  | 1     | 1 | bc3 |
| .....ugucauggagucgcuuAucuuca..... | 15    | 1 | bc3 |
| .....ugucauggUgucgcucucuuca.....  | 8     | 1 | bc3 |
| .....ugucauggagucUcucucuuca.....  | 8     | 1 | bc3 |
| .....ugucauggagCagcucucuuca.....  | 30    | 1 | bc3 |
| .....ugucauggagucgcucucuuca.....  | 14521 | 0 | bc3 |
| .....ugucauggagucAcucucuuca.....  | 6     | 1 | bc3 |
| .....ugucauggagucgcuuUucuuca..... | 6     | 1 | bc3 |
| .....ugucAauggagucgcucucuuca..... | 2     | 1 | bc3 |
| .....ugucauggagucgcucucuuU.....   | 1000  | 1 | bc3 |
| .....ugCcauggagucgcucucuuca.....  | 3     | 1 | bc3 |
| .....ugucauggaguUgcucucuuca.....  | 9     | 1 | bc3 |
| .....ugucauggagucCucucuuca.....   | 1     | 1 | bc3 |
| .....ugucauCgagucgcucucuuca.....  | 1     | 1 | bc3 |
| .....ugucaCggagucgcucucuuca.....  | 3     | 1 | bc3 |
| .....Agucauggagucgcucucuuca.....  | 4     | 1 | bc3 |

cugaggugaagcugaagagagcccgucuaauugacaguucaagaccacgagucguugugugcugucauggagucgcucucuucagauccggucaau

|                                      |      |   |     |
|--------------------------------------|------|---|-----|
| .....ugucaugCagucgcucucuca.....      | 2    | 1 | bc3 |
| .....ugucauggagucgcucucuucag.....    | 4    | 0 | bc3 |
| .....ugucauggagucgcucucucaA.....     | 16   | 1 | bc3 |
| .....ugucauggagucgcucucucaC.....     | 3    | 1 | bc3 |
| .....ugucauggagucgcucucucaU.....     | 104  | 1 | bc3 |
| .....ugucauggagucgcucucuucaga.....   | 1    | 0 | bc3 |
| .....ugucauggagucgcucucuucagC.....   | 1    | 1 | bc3 |
| .....gucauggagGcgcucucu.....         | 1    | 1 | bc3 |
| .....gucauggagGcgcucucuuc.....       | 1    | 1 | bc3 |
| .....gucauggagGcgcucucuca.....       | 8    | 1 | bc3 |
| .....gucauggagucgcucucuca.....       | 18   | 0 | bc3 |
| .....ucauggagucgcucucuca.....        | 2    | 0 | bc3 |
| .....cauggagGcgcucucuca.....         | 1    | 1 | bc3 |
| .....auggagucgcucucuca.....          | 11   | 0 | bc3 |
| .....auggagGcgcucucuca.....          | 3    | 1 | bc3 |
| .....Caagagagcccgucuaauugacagu.....  | 5    | 1 | bc6 |
| .....aagagagcccgucuaauugU.....       | 2    | 1 | bc6 |
| .....aagagagcAagucuaauugacag.....    | 102  | 1 | bc6 |
| .....aagagagcccgucuaauugacag.....    | 166  | 0 | bc6 |
| .....aagagGcccgucuaauugacag.....     | 1    | 1 | bc6 |
| .....aagagagcccgucuaauUacagu.....    | 1    | 1 | bc6 |
| .....aagagagcGgucuaauugacagu.....    | 1    | 1 | bc6 |
| .....aagagagcccgucuaauAacagu.....    | 3    | 1 | bc6 |
| .....aagagagcccgGcuaauugacagu.....   | 1    | 1 | bc6 |
| .....aaAagagcccgucuaauugacagu.....   | 1    | 1 | bc6 |
| .....Gagagagcccgucuaauugacagu.....   | 2    | 1 | bc6 |
| .....aagagagcccgucuaauugacGgu.....   | 2    | 1 | bc6 |
| .....aagagagcccgucuaauugacagC.....   | 1    | 1 | bc6 |
| .....aagagagUcgucuaauugacagu.....    | 1    | 1 | bc6 |
| .....aagagagcccgucuaauugacagu.....   | 2869 | 0 | bc6 |
| .....aagagagcccgucuaauugaAagu.....   | 2    | 1 | bc6 |
| .....aagagagcccgucCauugacagu.....    | 1    | 1 | bc6 |
| .....aagagagcccgUauugacagu.....      | 1    | 1 | bc6 |
| .....aagaAagcccgucuaauugacagu.....   | 1    | 1 | bc6 |
| .....aagagagcccgucuaauugCcagu.....   | 1    | 1 | bc6 |
| .....aagagagcAagucuaauugacagu.....   | 2417 | 1 | bc6 |
| .....aagagagcccgucuaauugaUagu.....   | 1    | 1 | bc6 |
| .....aagagagcccgucuaauugacagG.....   | 7    | 1 | bc6 |
| .....aagCgagcccgucuaauugacagu.....   | 1    | 1 | bc6 |
| .....aagagagcccgUauugacagu.....      | 1    | 1 | bc6 |
| .....aagagagcccgucUuugacagu.....     | 1    | 1 | bc6 |
| .....aagagagcccgucuaauugaGagu.....   | 1    | 1 | bc6 |
| .....aagagCgcccgucuaauugacagu.....   | 3    | 1 | bc6 |
| .....aagagGcccgucuaauugacagu.....    | 2    | 1 | bc6 |
| .....aagagagcccgCcuauugacagu.....    | 1    | 1 | bc6 |
| .....aagagagAcgucuaauugacagu.....    | 2    | 1 | bc6 |
| .....aagagagcccgucuauCgacagu.....    | 1    | 1 | bc6 |
| .....aagagagcccgucuaauugacCgu.....   | 3    | 1 | bc6 |
| .....aagagagcccgucuaauugGcagu.....   | 1    | 1 | bc6 |
| .....aagagagcccgucuaauugacagA.....   | 1    | 1 | bc6 |
| .....aagagagcccgucuaauugacaguG.....  | 1    | 1 | bc6 |
| .....aagagagcAagucuaauugacaguu.....  | 39   | 1 | bc6 |
| .....aagagagcccgucuaauugacaguu.....  | 40   | 0 | bc6 |
| .....aagagagcccgucuaauugacaguA.....  | 2    | 1 | bc6 |
| .....aagagagcccgucuaauugacaguuU..... | 2    | 1 | bc6 |
| .....agagagcccgGcuauugacag.....      | 1    | 1 | bc6 |
| .....agagagcAagucuaauugacag.....     | 1    | 1 | bc6 |
| .....agagagcAagucuaauugacagu.....    | 5    | 1 | bc6 |
| .....agagagcccgucuaauugacagu.....    | 15   | 0 | bc6 |
| .....agagagcccgucuaauugacaguu.....   | 1    | 0 | bc6 |
| .....gagagcccgucuaauugacag.....      | 1    | 0 | bc6 |
| .....agagcccgucuaauugacagu.....      | 1    | 0 | bc6 |
| .....gagcccgucuaauugacagG.....       | 1    | 1 | bc6 |
| .....gagcAagucuaauugacagu.....       | 11   | 1 | bc6 |
| .....gagcccgucuaauugacagu.....       | 6    | 0 | bc6 |
| .....ucaagaccacgagucguuguguc.....    | 5    | 0 | bc6 |
| .....ucaagaccacgagucguuguguc.....    | 6    | 0 | bc6 |
| .....ucaagaccacgagucguugugGgcu.....  | 1    | 1 | bc6 |

cugaggugaagcugaagagagccgucuaauugacaguucaagaccacgagucguugugugucugucuauggagucgcucucucuaagauccggucaau

|                                                          |       |   |     |
|----------------------------------------------------------|-------|---|-----|
| .....ucaagaccacgagucguugugugcuUu.....                    | 1     | 1 | bc6 |
| .....ucaagaccacgagucguugugucugucuauggagucgcucucucua..... | 2     | 0 | bc6 |
| .....gcugucuauggagucgcucucucua.....                      | 1     | 0 | bc6 |
| .....cugucuauggagucgcucucuu.....                         | 2     | 0 | bc6 |
| .....cugucuauggagucgcucucuuU.....                        | 3     | 1 | bc6 |
| .....cugucuauggagucgcucucua.....                         | 24    | 0 | bc6 |
| .....cugucuauggagGcgcucucua.....                         | 4     | 1 | bc6 |
| .....ugucuauggagGcgcucuc.....                            | 8     | 1 | bc6 |
| .....ugucuauggagucgcucuc.....                            | 11    | 0 | bc6 |
| .....ugucuauggagucgcucU.....                             | 2     | 1 | bc6 |
| .....ugucuauggagucgcucuc.....                            | 27    | 0 | bc6 |
| .....ugucuauggagGcgcucuc.....                            | 94    | 1 | bc6 |
| .....ugucuauggagAcgcucucuu.....                          | 2     | 1 | bc6 |
| .....ugucuauggGgucgcucucuu.....                          | 1     | 1 | bc6 |
| .....ugucuauggaguGcgcucucuu.....                         | 1     | 1 | bc6 |
| .....ugucuauggUgucgcucucuu.....                          | 1     | 1 | bc6 |
| .....ugucuauggagucgcucucuu.....                          | 417   | 0 | bc6 |
| .....ugucuauggagCgcgcucucuu.....                         | 3     | 1 | bc6 |
| .....ugucuauggagGcgcucucuu.....                          | 710   | 1 | bc6 |
| .....ugucuauggagucgcucucuu.....                          | 188   | 0 | bc6 |
| .....ugucuauggagucgcucucuuU.....                         | 1     | 1 | bc6 |
| .....ugucuauggagGcgcucucuu.....                          | 383   | 1 | bc6 |
| .....ugucuauggagucCucucucuu.....                         | 1     | 1 | bc6 |
| .....ugucuauggagucgcucucua.....                          | 15360 | 0 | bc6 |
| .....ugucuauggGgucgcucucua.....                          | 8     | 1 | bc6 |
| .....ugucuaugUagucgcucucua.....                          | 2     | 1 | bc6 |
| .....ugucuauggagucGAcucua.....                           | 1     | 1 | bc6 |
| .....ugucuauggagucGUucucua.....                          | 5     | 1 | bc6 |
| .....ugucuauggaguUgucucua.....                           | 8     | 1 | bc6 |
| .....ugucuauggagucGUcucua.....                           | 3     | 1 | bc6 |
| .....ugucuauggagucgcCucucua.....                         | 3     | 1 | bc6 |
| .....Cgucuauggagucgcucucua.....                          | 9     | 1 | bc6 |
| .....ugucuauggagucgcucucua.....                          | 4     | 1 | bc6 |
| .....ugucuauggagucgcucucuuG.....                         | 45    | 1 | bc6 |
| .....ugucuauggagucgcucucuuUa.....                        | 3     | 1 | bc6 |
| .....ugucuauggagucgcGcucua.....                          | 2     | 1 | bc6 |
| .....ugCcauggagucgcucucua.....                           | 3     | 1 | bc6 |
| .....ugucuauggagCgcgcucucua.....                         | 26    | 1 | bc6 |
| .....ugucauUgagucgcucucua.....                           | 6     | 1 | bc6 |
| .....ugucuauggagucgcUucua.....                           | 1     | 1 | bc6 |
| .....Ggucuauggagucgcucucua.....                          | 2     | 1 | bc6 |
| .....ugucCuggagucgcucucua.....                           | 1     | 1 | bc6 |
| .....ugucaugAagucgcucucua.....                           | 7     | 1 | bc6 |
| .....ugucuauggagucgcucucua.....                          | 1     | 1 | bc6 |
| .....ugucuauggaCucgcucucua.....                          | 3     | 1 | bc6 |
| .....ugucuauggUgucgcucucua.....                          | 7     | 1 | bc6 |
| .....ugucGuggagucgcucucua.....                           | 7     | 1 | bc6 |
| .....uAucuauggagucgcucucua.....                          | 4     | 1 | bc6 |
| .....ugucuauggagucgcucucuCca.....                        | 32    | 1 | bc6 |
| .....ugucuauggagucAcucucua.....                          | 4     | 1 | bc6 |
| .....ugAcuauggagucgcucucua.....                          | 5     | 1 | bc6 |
| .....ugucuauggCgucgcucucua.....                          | 7     | 1 | bc6 |
| .....ugucuauggagucgcucUcua.....                          | 1     | 1 | bc6 |
| .....ugucuauggagucCucucua.....                           | 2     | 1 | bc6 |
| .....ugucaCggagucgcucucua.....                           | 4     | 1 | bc6 |
| .....ugucuauggagucgcucUuua.....                          | 7     | 1 | bc6 |
| .....ugucuauggagucgcucucucC.....                         | 36    | 1 | bc6 |
| .....ugucUuggagucgcucucua.....                           | 5     | 1 | bc6 |
| .....ugucuauggaguGcgcucucua.....                         | 5     | 1 | bc6 |
| .....ugucauAagagucgcucucua.....                          | 4     | 1 | bc6 |
| .....ugucuauggaUucgcucucua.....                          | 1     | 1 | bc6 |
| .....ugucuauggagucgcucucU.....                           | 1416  | 1 | bc6 |
| .....ugucuauggagucgcUucua.....                           | 4     | 1 | bc6 |
| .....ugucuauggagucgcucucCuca.....                        | 3     | 1 | bc6 |
| .....ugucauCgagucgcucucua.....                           | 3     | 1 | bc6 |
| .....ugucuauggagGcgcucucua.....                          | 5359  | 1 | bc6 |
| .....ugucaugCagucgcucucua.....                           | 1     | 1 | bc6 |
| .....ugucuauggagucgcucCucua.....                         | 4     | 1 | bc6 |
| .....ugucuauggagucgcucucua.....                          | 4     | 1 | bc6 |



cugaggugaagcugaagagagccgcgucuaauugacaguucaagaccacagagucguugugugcugucaguggagucgcucucucuaagauccggucaau

|                                       |      |   |     |
|---------------------------------------|------|---|-----|
| .....ugucauggagucgcucucuuAa.....      | 14   | 1 | bc6 |
| .....ugucauggagucgcucucuuAa.....      | 6    | 1 | bc6 |
| .....ugucauggaAucgcucucuuAa.....      | 5    | 1 | bc6 |
| .....AgucauggagucgcucucuuAa.....      | 3    | 1 | bc6 |
| .....ugucauggagucgcucucuuAa.....      | 6    | 1 | bc6 |
| .....ugucauggagucgcucucuuGca.....     | 8    | 1 | bc6 |
| .....ugGcauggagucgcucucuuAa.....      | 3    | 1 | bc6 |
| .....ugucauggagucgcucucuuAa.....      | 14   | 1 | bc6 |
| .....ugucauggagucgcucucuuucag.....    | 4    | 0 | bc6 |
| .....ugucauggagucgcucucuuAaU.....     | 117  | 1 | bc6 |
| .....ugucauggagucgcucucuuAaC.....     | 3    | 1 | bc6 |
| .....ugucauggagucgcucucuuAaA.....     | 20   | 1 | bc6 |
| .....gucauggagGcgcucucuu.....         | 3    | 1 | bc6 |
| .....gucauggagGcgcucucuuAa.....       | 10   | 1 | bc6 |
| .....gucauggagucgcucucuuAa.....       | 31   | 0 | bc6 |
| .....gucauggagucgcucucuuucU.....      | 3    | 1 | bc6 |
| .....ucauggagGcgcucucuuAa.....        | 1    | 1 | bc6 |
| .....ucauggagucgcucucuuAa.....        | 1    | 0 | bc6 |
| .....,auggagucgcucucuuAa.....         | 19   | 0 | bc6 |
| .....,auggagucgcucucuuC.....          | 1    | 1 | bc6 |
| .....,auggagGcgcucucuuAa.....         | 14   | 1 | bc6 |
| .....,auggagucgcucucuuucU.....        | 1    | 1 | bc6 |
| .....Caagagagccgcgucuaauugacaguu..... | 2    | 1 | bc5 |
| .....Caagagagccgcgucuaauugacaguu..... | 1    | 1 | bc5 |
| .....aagagagcAgucuaauugac.....        | 1    | 1 | bc5 |
| .....aagagagccgcgucuaauugac.....      | 1    | 0 | bc5 |
| .....aagagagcAgucuaauugaca.....       | 2    | 1 | bc5 |
| .....aagagagccgcgucuaauugacag.....    | 265  | 0 | bc5 |
| .....aagagagcAgucuaauugacag.....      | 136  | 1 | bc5 |
| .....aagagagccgcgucuaauugacaA.....    | 1    | 1 | bc5 |
| .....aagaAagccgcgucuaauugacaguu.....  | 1    | 1 | bc5 |
| .....aagagagccgcgucuaCugacaguu.....   | 1    | 1 | bc5 |
| .....aagagaCccgcgucuaauugacaguu.....  | 1    | 1 | bc5 |
| .....aagagagccgcgucuaauugacagC.....   | 2    | 1 | bc5 |
| .....aagagagccgcgucuaauugaGagu.....   | 1    | 1 | bc5 |
| .....aagagagccgcgucuaauugacGgu.....   | 3    | 1 | bc5 |
| .....aagagagccgcgucuaauAacaguu.....   | 2    | 1 | bc5 |
| .....aagaUagccgcgucuaauugacaguu.....  | 1    | 1 | bc5 |
| .....aagagagccgcgucuaauugaUagu.....   | 2    | 1 | bc5 |
| .....aagagagcUgucuaauugacaguu.....    | 1    | 1 | bc5 |
| .....aagagagccgcgucuaauugacUgu.....   | 1    | 1 | bc5 |
| .....aagagagccAucuaauugacaguu.....    | 1    | 1 | bc5 |
| .....aagagagcAgucuaauugacaguu.....    | 1    | 1 | bc5 |
| .....aagagagcAgucuaauugacaguu.....    | 2526 | 1 | bc5 |
| .....aagagagccgCcuauugacaguu.....     | 1    | 1 | bc5 |
| .....aagagagccgcgucuaauugacaguu.....  | 1    | 1 | bc5 |
| .....aagagagccgcgucuaauugacaCu.....   | 1    | 1 | bc5 |
| .....aagagagccUucuaauugacaguu.....    | 1    | 1 | bc5 |
| .....aagagagccgcgucuaauugacaguu.....  | 1    | 1 | bc5 |
| .....aagagagccgcgucuaauugUcaguu.....  | 1    | 1 | bc5 |
| .....aagagagccgcgucuaAugacaguu.....   | 3    | 1 | bc5 |
| .....aagagcGccgcgucuaauugacaguu.....  | 2    | 1 | bc5 |
| .....aagagagccgAcuaauugacaguu.....    | 1    | 1 | bc5 |
| .....aagGgagccgcgucuaauugacaguu.....  | 1    | 1 | bc5 |
| .....aagagagUcgcgucuaauugacaguu.....  | 3    | 1 | bc5 |
| .....aagagagccgcgucuaauugacagG.....   | 8    | 1 | bc5 |
| .....aagagagccguUuaauugacaguu.....    | 1    | 1 | bc5 |
| .....aagagagccgcgucuaauugacCgu.....   | 2    | 1 | bc5 |
| .....aagagagccgcgucuaucgacaguu.....   | 1    | 1 | bc5 |
| .....aagagaUccgcgucuaauugacaguu.....  | 2    | 1 | bc5 |
| .....aagagagccgGcuauugacaguu.....     | 1    | 1 | bc5 |
| .....Uagagagccgcgucuaauugacaguu.....  | 1    | 1 | bc5 |
| .....aagagagccgcgucuaauugacaguu.....  | 3534 | 0 | bc5 |
| .....aagagagccgcgucuaugacaguu.....    | 1    | 1 | bc5 |
| .....aagagagccgcgucuaauugacaguuG..... | 2    | 1 | bc5 |
| .....aagagagcAgucuaauugacaguu.....    | 36   | 1 | bc5 |
| .....aagagagccgcgucuaauugacaguu.....  | 53   | 0 | bc5 |
| .....aagagagccgcgucuaauugacaguuG..... | 3    | 1 | bc5 |

cugaggugaagcugaagagaccgucuaauugacaguucaagaccacgagucguugugugcugucauggagucgcucucuucagaugaucgggucaau

|                                        |       |   |     |
|----------------------------------------|-------|---|-----|
| .....aagagagccgucuaauugacaguuU.....    | 3     | 1 | bc5 |
| .....agagagccgucuaauugacag.....        | 1     | 0 | bc5 |
| .....agagagcAgucuaauugacagu.....       | 3     | 1 | bc5 |
| .....agagagccgucuaauugacagu.....       | 14    | 0 | bc5 |
| .....agagagcAgucuaauugacaguu.....      | 1     | 1 | bc5 |
| .....agagagccgucuaauugacaguu.....      | 2     | 0 | bc5 |
| .....Aagagccgucuaauugacagu.....        | 1     | 1 | bc5 |
| .....agagcAgucuaauugacagu.....         | 2     | 1 | bc5 |
| .....gagcAgucuaauugacagu.....          | 12    | 1 | bc5 |
| .....gagccgucuaauugacagu.....          | 17    | 0 | bc5 |
| .....ucaagaccacgagucguugugugc.....     | 7     | 0 | bc5 |
| .....ucaagaccacgagucguugugugcu.....    | 14    | 0 | bc5 |
| .....ucaagaccacgagucguugugugcC.....    | 1     | 1 | bc5 |
| .....ucaagaccacgagucguugugugcuU.....   | 1     | 1 | bc5 |
| .....ucaagaccacgagucguugugugcguca..... | 1     | 0 | bc5 |
| .....ccacgagucguugugugc.....           | 1     | 0 | bc5 |
| .....gucugucauggagucgcucucuca.....     | 1     | 0 | bc5 |
| .....gucugucauggagucgcucucuca.....     | 2     | 0 | bc5 |
| .....cugucauggagucgcucucu.....         | 2     | 0 | bc5 |
| .....cugucauggagucgcucucuuc.....       | 1     | 0 | bc5 |
| .....cugucauggagGcgcucucuuc.....       | 1     | 1 | bc5 |
| .....cugucauggagGcgcucucuca.....       | 5     | 1 | bc5 |
| .....cugucauggagucgcucucuucU.....      | 1     | 1 | bc5 |
| .....cugucauggagucgcucucuca.....       | 29    | 0 | bc5 |
| .....cugucauggagucgcucucucaU.....      | 1     | 1 | bc5 |
| .....ugucauggagucgcucuU.....           | 1     | 1 | bc5 |
| .....ugucauggagGcgcucuc.....           | 10    | 1 | bc5 |
| .....ugucauggagucgcucuc.....           | 13    | 0 | bc5 |
| .....ugucauggagucgcucucu.....          | 41    | 0 | bc5 |
| .....ugucauggagGcgcucucu.....          | 157   | 1 | bc5 |
| .....ugucauggagucgcucucuG.....         | 1     | 1 | bc5 |
| .....ugucauggagucgcucucuA.....         | 1     | 1 | bc5 |
| .....ugucauggagucgcucucu.....          | 662   | 0 | bc5 |
| .....ugucauggagucgcCucucu.....         | 1     | 1 | bc5 |
| .....ugucauggagucgcucucuGuu.....       | 1     | 1 | bc5 |
| .....ugucauggagCgcucucu.....           | 1     | 1 | bc5 |
| .....ugucauggagucgcucucuC.....         | 1     | 1 | bc5 |
| .....ugucauggagucgcucucuUuu.....       | 1     | 1 | bc5 |
| .....ugucaugCagucgcucucu.....          | 1     | 1 | bc5 |
| .....ugucauggagGcgcucucu.....          | 958   | 1 | bc5 |
| .....ugucauggagucgcucucuuc.....        | 290   | 0 | bc5 |
| .....ugucauggagucgcucuAuuc.....        | 1     | 1 | bc5 |
| .....ugucauggagucgcucucuA.....         | 1     | 1 | bc5 |
| .....ugucauggagucgcucucuAc.....        | 1     | 1 | bc5 |
| .....ugucauggagGcgcucucuuc.....        | 552   | 1 | bc5 |
| .....ugCcauggagucgcucucuuc.....        | 1     | 1 | bc5 |
| .....ugucauggagAcgcucucuuc.....        | 1     | 1 | bc5 |
| .....ugucauggagucgcucucuU.....         | 2     | 1 | bc5 |
| .....ugucauggagucgcCucucuca.....       | 4     | 1 | bc5 |
| .....ugucauggagucgcucucuucC.....       | 55    | 1 | bc5 |
| .....ugucGuggagucgcucucuca.....        | 2     | 1 | bc5 |
| .....ugucauggagucgcucuUuca.....        | 7     | 1 | bc5 |
| .....ugucaugAagucgcucucuca.....        | 2     | 1 | bc5 |
| .....ugucauggagGcgcucucuca.....        | 7365  | 1 | bc5 |
| .....ugucauAagucgcucucuca.....         | 1     | 1 | bc5 |
| .....ugucauggagucgcucucuca.....        | 20732 | 0 | bc5 |
| .....ugucauggGgucgcucucuca.....        | 6     | 1 | bc5 |
| .....ugucauggagucgAucucuca.....        | 3     | 1 | bc5 |
| .....ugucauggagucgcucuGuuca.....       | 2     | 1 | bc5 |
| .....Agucauggagucgcucucuca.....        | 2     | 1 | bc5 |
| .....Cgucauggagucgcucucuca.....        | 4     | 1 | bc5 |
| .....ugucauggagucgcucucuAca.....       | 23    | 1 | bc5 |
| .....ugucauggagucgcucucuGca.....       | 3     | 1 | bc5 |
| .....uguauggagucgcucucuca.....         | 3     | 1 | bc5 |
| .....ugAcauggagucgcucucuca.....        | 2     | 1 | bc5 |
| .....ugucauggagucAcucucuca.....        | 9     | 1 | bc5 |
| .....ugucauggagucgcucucuAa.....        | 7     | 1 | bc5 |
| .....ugucaGggagucgcucucuca.....        | 4     | 1 | bc5 |
| .....ugucauUgagucgcucucuca.....        | 3     | 1 | bc5 |

cugaggugaagcugaagagagccgcgcuauugacaguucaagaccacagagucguugugugcugucauggagucgcucucucaagauccggucaau

|                                     |      |   |     |
|-------------------------------------|------|---|-----|
| .....ugucUuggagucgcucucuca.....     | 1    | 1 | bc5 |
| .....uUucauggagucgcucucuca.....     | 1    | 1 | bc5 |
| .....ugucauggCgucgcucucuca.....     | 2    | 1 | bc5 |
| .....ugucauggaguAgcucucuca.....     | 5    | 1 | bc5 |
| .....uguGauggagucgcucucuca.....     | 4    | 1 | bc5 |
| .....ugucauggagucgcUucuca.....      | 4    | 1 | bc5 |
| .....ugucauggagucgcUuucuca.....     | 5    | 1 | bc5 |
| .....ugucauggagucgcucCucuca.....    | 3    | 1 | bc5 |
| .....ugucauggagucCucucuca.....      | 1    | 1 | bc5 |
| .....ugucauggagucgcucAuca.....      | 1    | 1 | bc5 |
| .....ugucauggaguUgcucucuca.....     | 3    | 1 | bc5 |
| .....ugucauggagucgcucucuucG.....    | 83   | 1 | bc5 |
| .....ugucauggagucgcucucCuca.....    | 4    | 1 | bc5 |
| .....ugucauggagucgcucucuCca.....    | 32   | 1 | bc5 |
| .....ugucauggagucgcucucuGa.....     | 1    | 1 | bc5 |
| .....ugucaCggagucgcucucuca.....     | 4    | 1 | bc5 |
| .....ugucCuggagucgcucucuca.....     | 4    | 1 | bc5 |
| .....ugucaugCagucgcucucuca.....     | 5    | 1 | bc5 |
| .....ugucauggagucgcGucucuca.....    | 5    | 1 | bc5 |
| .....ugUauggagucgcucucuca.....      | 2    | 1 | bc5 |
| .....Ggucauggagucgcucucuca.....     | 2    | 1 | bc5 |
| .....ugucauggaUucgcucucuca.....     | 2    | 1 | bc5 |
| .....ugucauggagucgcucUuucuca.....   | 4    | 1 | bc5 |
| .....ugucauggaguGgcucucuca.....     | 3    | 1 | bc5 |
| .....ugucauggagCcgucucuca.....      | 14   | 1 | bc5 |
| .....ugGcauggagucgcucucuca.....     | 6    | 1 | bc5 |
| .....ugucauggUgucgcucucuca.....     | 5    | 1 | bc5 |
| .....uCucauggagucgcucucuca.....     | 2    | 1 | bc5 |
| .....ugucaugUagucgcucucuca.....     | 1    | 1 | bc5 |
| .....ugucauggagucgUucucuca.....     | 5    | 1 | bc5 |
| .....ugCcauggagucgcucucuca.....     | 2    | 1 | bc5 |
| .....ugucauggagucgcucucuucU.....    | 1952 | 1 | bc5 |
| .....ugucauggaAucgcucucuca.....     | 2    | 1 | bc5 |
| .....ugucauggagucgcucucuUa.....     | 10   | 1 | bc5 |
| .....ugucauggagucUcucucuca.....     | 2    | 1 | bc5 |
| .....ugucauggaCucgcucucuca.....     | 5    | 1 | bc5 |
| .....uAucauggagucgcucucuca.....     | 5    | 1 | bc5 |
| .....ugucauggagAcgucucuca.....      | 9    | 1 | bc5 |
| .....ugucauggagucgcucucucaU.....    | 189  | 1 | bc5 |
| .....ugucauggagucgcucucucaA.....    | 21   | 1 | bc5 |
| .....ugucauggagucgcucucucaC.....    | 3    | 1 | bc5 |
| .....ugucauggagGgcucucuucag.....    | 2    | 1 | bc5 |
| .....ugucauggagucgcucucuucag.....   | 4    | 0 | bc5 |
| .....ugucauggagucgcucucucaCa.....   | 2    | 1 | bc5 |
| .....ugucauggagucgcucucucaAa.....   | 2    | 1 | bc5 |
| .....ugucauggagucgcucucuucaga.....  | 1    | 0 | bc5 |
| .....gucauggagGcgucucuu.....        | 1    | 1 | bc5 |
| .....gucauggagucgcucucuca.....      | 30   | 0 | bc5 |
| .....gucauggagucgcucucuucU.....     | 1    | 1 | bc5 |
| .....gucauggaguUgcucucuca.....      | 1    | 1 | bc5 |
| .....gucauggagGcgucucuca.....       | 14   | 1 | bc5 |
| .....ucauggagucgcucucuucU.....      | 1    | 1 | bc5 |
| .....ucauggagucgcucucuca.....       | 4    | 0 | bc5 |
| .....cauggagGcgucucuca.....         | 2    | 1 | bc5 |
| .....auggagucgcucucuca.....         | 22   | 0 | bc5 |
| .....auggagGcgucucuca.....          | 12   | 1 | bc5 |
| .....uCaagagagccgcgcuauugacagu..... | 1    | 1 | bc2 |
| .....Caagagagccgcgcuauugacagu.....  | 1    | 1 | bc2 |
| .....aagagagccgcgcuauugaca.....     | 1    | 0 | bc2 |
| .....aagagagccgcgcuauugacG.....     | 1    | 1 | bc2 |
| .....aagagagcccgUauugacag.....      | 1    | 1 | bc2 |
| .....aagagagcUgucuaugacag.....      | 1    | 1 | bc2 |
| .....aagagagccgcgcuauugacag.....    | 92   | 0 | bc2 |
| .....aagagagcAgucuaugacag.....      | 33   | 1 | bc2 |
| .....aagagagccgcgcuauugUcagu.....   | 1    | 1 | bc2 |
| .....aagagUgcccgcgcuauugacagu.....  | 1    | 1 | bc2 |
| .....aagagagccgcgcuauugacagA.....   | 1    | 1 | bc2 |
| .....aagagagccgcgcuauUacagu.....    | 2    | 1 | bc2 |

cugaggugaagcugaagagagccgcgucuaauugacaguucaagaccacgagucguugugugcugucauggagucgcucucuucagaugaucgggucaau

|                                       |      |   |     |
|---------------------------------------|------|---|-----|
| .....aagagagccUucuaauugacagu.....     | 1    | 1 | bc2 |
| .....aagagagcccgucUuugacagu.....      | 2    | 1 | bc2 |
| .....aagagagccgcgucuaauugCcagu.....   | 1    | 1 | bc2 |
| .....aagagaUccgucuaauugacagu.....     | 1    | 1 | bc2 |
| .....aagagagUccgucuaauugacagu.....    | 1    | 1 | bc2 |
| .....aaCagagccgcgucuaauugacagu.....   | 1    | 1 | bc2 |
| .....aagagagccgcgucuaauugacCgu.....   | 2    | 1 | bc2 |
| .....Gagagagccgcgucuaauugacagu.....   | 1    | 1 | bc2 |
| .....aagagagccgUuaauugacagu.....      | 1    | 1 | bc2 |
| .....aagagagccgcgucuaauugacagG.....   | 3    | 1 | bc2 |
| .....aagagagccgcgucuaauugaUagu.....   | 1    | 1 | bc2 |
| .....aagagagccgcgucuaauugacagu.....   | 1397 | 0 | bc2 |
| .....aGgagagccgcgucuaauugacagu.....   | 1    | 1 | bc2 |
| .....aagagagcccgUauauugacagu.....     | 1    | 1 | bc2 |
| .....aagagagccgcgucuaauugacGgu.....   | 3    | 1 | bc2 |
| .....aagagagcAguCuaauugacagu.....     | 786  | 1 | bc2 |
| .....aagagagccgcgucuaauugacaCu.....   | 1    | 1 | bc2 |
| .....aagaUagccgcgucuaauugacagu.....   | 1    | 1 | bc2 |
| .....aagagagccgcgucuaauugacaguu.....  | 22   | 0 | bc2 |
| .....aagagagcAguCuaauugacaguu.....    | 13   | 1 | bc2 |
| .....aagagagccgcgucuaauugacaguuU..... | 3    | 1 | bc2 |
| .....agagagccgcgucuaauugacagu.....    | 2    | 0 | bc2 |
| .....agagagccgcgucuaauugacaguu.....   | 1    | 0 | bc2 |
| .....agagccgcgucuaauugacagu.....      | 1    | 0 | bc2 |
| .....gagcAguCuaauugacagu.....         | 4    | 1 | bc2 |
| .....gagccgcgucuaauugacagu.....       | 6    | 0 | bc2 |
| .....ucaagaccacgagucguugugugc.....    | 1    | 0 | bc2 |
| .....ucaagaccacgagucguugugugc.....    | 4    | 0 | bc2 |
| .....gcugucauggagucgcucucuca.....     | 1    | 0 | bc2 |
| .....cugucauggagGcgcucucu.....        | 2    | 1 | bc2 |
| .....cugucauggagucgcucucuuc.....      | 1    | 0 | bc2 |
| .....cugucauggagucgcucucuca.....      | 16   | 0 | bc2 |
| .....cugucauggagGcgcucucuca.....      | 3    | 1 | bc2 |
| .....Augucauggagucgcucucuca.....      | 1    | 1 | bc2 |
| .....cugucauggagucgcucucuucU.....     | 3    | 1 | bc2 |
| .....ugucauggagucgcucuc.....          | 11   | 0 | bc2 |
| .....ugucauggagGcgcucuc.....          | 9    | 1 | bc2 |
| .....ugucauggagucgcucU.....           | 3    | 1 | bc2 |
| .....ugucauggagucgcucA.....           | 1    | 1 | bc2 |
| .....ugucauggagucgcucucu.....         | 17   | 0 | bc2 |
| .....uguauggagucgcucucu.....          | 1    | 1 | bc2 |
| .....ugucauggagGcgcucucu.....         | 44   | 1 | bc2 |
| .....ugucauggagucgcucucu.....         | 302  | 0 | bc2 |
| .....ugucauggagGcgcucucu.....         | 391  | 1 | bc2 |
| .....Cgucauggagucgcucucu.....         | 1    | 1 | bc2 |
| .....ugucauUgagucgcucucu.....         | 1    | 1 | bc2 |
| .....ugucauggagucgcucucuuc.....       | 151  | 0 | bc2 |
| .....ugGcauggagucgcucucuuc.....       | 1    | 1 | bc2 |
| .....ugucauggagGcgcucucuuc.....       | 256  | 1 | bc2 |
| .....ugucauggagCcgucucuuc.....        | 1    | 1 | bc2 |
| .....ugucauggagucgcucucuU.....        | 1    | 1 | bc2 |
| .....ugucauggaguAgcucucuuc.....       | 1    | 1 | bc2 |
| .....ugucauggagucgcucucuAuuc.....     | 1    | 1 | bc2 |
| .....ugucauggagucgcucucuCca.....      | 11   | 1 | bc2 |
| .....uAucauggagucgcucucuca.....       | 4    | 1 | bc2 |
| .....ugucauggagucgcucucuca.....       | 9246 | 0 | bc2 |
| .....ugucGuggagucgcucucuca.....       | 6    | 1 | bc2 |
| .....ugucaCggagucgcucucuca.....       | 4    | 1 | bc2 |
| .....ugucauggagucgcucucuUa.....       | 3    | 1 | bc2 |
| .....ugucauggagucgcucucuucG.....      | 17   | 1 | bc2 |
| .....ugucauggagucgcucucuCuca.....     | 2    | 1 | bc2 |
| .....ugucauggagucgcucucuUuca.....     | 4    | 1 | bc2 |
| .....ugucauggagucgcucuUucuca.....     | 4    | 1 | bc2 |
| .....ugucauggagucgcucucuucC.....      | 26   | 1 | bc2 |
| .....ugucauggaguUgcucucuca.....       | 1    | 1 | bc2 |
| .....uguauggagucgcucucuca.....        | 3    | 1 | bc2 |
| .....ugucauggaguGgcucucuca.....       | 2    | 1 | bc2 |
| .....ugucauggagucAcucucuca.....       | 7    | 1 | bc2 |
| .....ugucauggaguAgcucucuca.....       | 6    | 1 | bc2 |

cugaggugaagcugaagagagccgcgucuaauugacaguucaagaccacagagucguugugugcugucauggagucgcucucuucagauaucgggucaau

|                                     |      |   |     |
|-------------------------------------|------|---|-----|
| .....ugucauAagagucgcucucuca.....    | 1    | 1 | bc2 |
| .....ugucauggaAucgcucucuca.....     | 1    | 1 | bc2 |
| .....ugucauggagucgUucucuca.....     | 3    | 1 | bc2 |
| .....ugucauggGgucgcucucuca.....     | 8    | 1 | bc2 |
| .....ugucauggagucgcucucuAca.....    | 9    | 1 | bc2 |
| .....ugucauggagucgcucucuGa.....     | 1    | 1 | bc2 |
| .....ugucauggagCcgucucuca.....      | 17   | 1 | bc2 |
| .....ugucauggUgucgcucucuca.....     | 8    | 1 | bc2 |
| .....ugucauggagGcgucucuca.....      | 3268 | 1 | bc2 |
| .....ugucauggagucgGucucuca.....     | 1    | 1 | bc2 |
| .....Ggucauggagucgcucucuca.....     | 1    | 1 | bc2 |
| .....ugCcauggagucgcucucuca.....     | 2    | 1 | bc2 |
| .....ugucauggagucgAucucuca.....     | 4    | 1 | bc2 |
| .....ugucauggaUucgcucucuca.....     | 6    | 1 | bc2 |
| .....ugucauggagucgcuAucuca.....     | 3    | 1 | bc2 |
| .....ugucauggagucgcucCcuca.....     | 2    | 1 | bc2 |
| .....ugucauggagucUucucuca.....      | 2    | 1 | bc2 |
| .....ugucauggagucgcucuAuuca.....    | 2    | 1 | bc2 |
| .....Agucauggagucgcucucuca.....     | 3    | 1 | bc2 |
| .....ugucauggaCucgcucucuca.....     | 2    | 1 | bc2 |
| .....ugucauggagAcgucucuca.....      | 9    | 1 | bc2 |
| .....uguUauggagucgcucucuca.....     | 4    | 1 | bc2 |
| .....uguGauggagucgcucucuca.....     | 2    | 1 | bc2 |
| .....Cgucauggagucgcucucuca.....     | 3    | 1 | bc2 |
| .....ugucauggagucgcucucuGca.....    | 4    | 1 | bc2 |
| .....ugucCuggagucgcucucuca.....     | 1    | 1 | bc2 |
| .....ugucauggagucgcucuGuuca.....    | 1    | 1 | bc2 |
| .....ugucauggagucgcucuGucuca.....   | 1    | 1 | bc2 |
| .....ugucauggagucgcCucuca.....      | 5    | 1 | bc2 |
| .....ugucauGgagucgcucucuca.....     | 1    | 1 | bc2 |
| .....ugucauggCgucgcucucuca.....     | 2    | 1 | bc2 |
| .....ugucauggagucgcucucuAa.....     | 2    | 1 | bc2 |
| .....ugucauggagucgcucucuU.....      | 682  | 1 | bc2 |
| .....ugucauggagucgcucucuucag.....   | 1    | 0 | bc2 |
| .....ugucauggagucgcucucuucaA.....   | 13   | 1 | bc2 |
| .....ugucauggagucgcucucuucaU.....   | 90   | 1 | bc2 |
| .....Uucauggagucgcucucuca.....      | 1    | 1 | bc2 |
| .....gucauggagucgcucucuU.....       | 1    | 1 | bc2 |
| .....gucauggagucgcucucuca.....      | 16   | 0 | bc2 |
| .....gucauggagGcgucucuca.....       | 10   | 1 | bc2 |
| .....cauggagucgcucucuca.....        | 1    | 0 | bc2 |
| .....auggagGcgucucuca.....          | 3    | 1 | bc2 |
| .....auggagucgcucucuca.....         | 12   | 0 | bc2 |
| .....Caagagagccgcucuaauugacagu..... | 4    | 1 | bc7 |
| .....aagagagccgcucuaauugac.....     | 3    | 0 | bc7 |
| .....aagagagcAagucuaauugaca.....    | 1    | 1 | bc7 |
| .....aagagagccgCcuauugacag.....     | 1    | 1 | bc7 |
| .....aagagagccgcucuaauugacag.....   | 226  | 0 | bc7 |
| .....aagGgagccgcucuaauugacag.....   | 1    | 1 | bc7 |
| .....aagagagcAagucuaauugacag.....   | 122  | 1 | bc7 |
| .....aagagagccgcucuaauAacagu.....   | 2    | 1 | bc7 |
| .....aagagagcUgucuaauugacagu.....   | 2    | 1 | bc7 |
| .....aagagagccgcucuaauugaAagu.....  | 2    | 1 | bc7 |
| .....aUgagagccgcucuaauugacagu.....  | 1    | 1 | bc7 |
| .....aagagagccguGuaauugacagu.....   | 1    | 1 | bc7 |
| .....aagaAagccgcucuaauugacagu.....  | 2    | 1 | bc7 |
| .....aagagagccgcucuaauugGcagu.....  | 1    | 1 | bc7 |
| .....aagagagccgAcuaauugacagu.....   | 1    | 1 | bc7 |
| .....aagagagccgucCauugacagu.....    | 1    | 1 | bc7 |
| .....aagagagccgGcuauugacagu.....    | 3    | 1 | bc7 |
| .....aagagagccguUuaauugacagu.....   | 2    | 1 | bc7 |
| .....aagagagccgCcuauugacagu.....    | 5    | 1 | bc7 |
| .....aagagagccgcucuaauugacGgu.....  | 3    | 1 | bc7 |
| .....aaAagagccgcucuaauugacagu.....  | 1    | 1 | bc7 |
| .....aGgagagccgcucuaauugacagu.....  | 1    | 1 | bc7 |
| .....aagagagAcgucuaauugacagu.....   | 4    | 1 | bc7 |
| .....aagagagcGgucuaauugacagu.....   | 1    | 1 | bc7 |
| .....aagagagccgcucuaauAgacagu.....  | 1    | 1 | bc7 |

cugaggugaagcugaagagagccgcgucuaauugacagucuaaagaccacgagucguugugugcugucuauggagucgcucucucuaagauccggucaau

|                                       |      |   |     |
|---------------------------------------|------|---|-----|
| .....aagagagccgcgucuaauugacagG.....   | 13   | 1 | bc7 |
| .....aagagaCccgcgucuaauugacagu.....   | 2    | 1 | bc7 |
| .....aagagagccgcgucuaauUacagu.....    | 1    | 1 | bc7 |
| .....aagagagccgcgucuaauugacagC.....   | 1    | 1 | bc7 |
| .....aagagaUccgcgucuaauugacagu.....   | 1    | 1 | bc7 |
| .....aagGgagccgcgucuaauugacagu.....   | 1    | 1 | bc7 |
| .....aagagagccgcgucuaauugacagu.....   | 3345 | 0 | bc7 |
| .....aagagagcccguaauugacagu.....      | 1    | 1 | bc7 |
| .....aagagagccgcgucuaauugacUgu.....   | 2    | 1 | bc7 |
| .....aagagagcAgucuaauugacagu.....     | 2338 | 1 | bc7 |
| .....aagagCccgcgucuaauugacagu.....    | 1    | 1 | bc7 |
| .....aagagagUccgcgucuaauugacagu.....  | 1    | 1 | bc7 |
| .....aagagagccCucuaauugacagu.....     | 1    | 1 | bc7 |
| .....aagagagccgcgucuaauugacCgu.....   | 4    | 1 | bc7 |
| .....Gagagagccgcgucuaauugacagu.....   | 3    | 1 | bc7 |
| .....aagagUgcccgcgucuaauugacagu.....  | 1    | 1 | bc7 |
| .....aagagGcccgcgucuaauugacagu.....   | 1    | 1 | bc7 |
| .....aagagagccgcgucuaauugacaguG.....  | 3    | 1 | bc7 |
| .....aagagagcAgucuaauugacaguu.....    | 25   | 1 | bc7 |
| .....aagagagccgcgucuaauugacaguu.....  | 31   | 0 | bc7 |
| .....aagagagccgcgucuaauugacaguuU..... | 1    | 1 | bc7 |
| .....aagagagccgcgucuaauugacaguuG..... | 1    | 1 | bc7 |
| .....agagagccgcgucuaauugacag.....     | 4    | 0 | bc7 |
| .....agagagccgcgucuaauugacagu.....    | 22   | 0 | bc7 |
| .....agagGcccgcgucuaauugacagu.....    | 1    | 1 | bc7 |
| .....agagagccgcgucuaauugacaguu.....   | 2    | 0 | bc7 |
| .....agagccgcgucuaauugacagu.....      | 1    | 0 | bc7 |
| .....gagcAgucuaauugacagu.....         | 11   | 1 | bc7 |
| .....gagccgcgucuaauugacagu.....       | 14   | 0 | bc7 |
| .....ucaaagaccacgagucguugugug.....    | 1    | 0 | bc7 |
| .....ucaaagaccacgagucguugugugc.....   | 4    | 0 | bc7 |
| .....ucaaagaccacgagucguugugugcu.....  | 7    | 0 | bc7 |
| .....gcugucuauggagucgcucucucuc.....   | 1    | 0 | bc7 |
| .....cugucuauggagucgcucucucuu.....    | 2    | 0 | bc7 |
| .....cugucuauggagGcgcucucuu.....      | 3    | 1 | bc7 |
| .....cugucuauggagucgcucucucua.....    | 19   | 0 | bc7 |
| .....cugucuauggagucgcucucucU.....     | 4    | 1 | bc7 |
| .....cugucuauggagGcgcucucucua.....    | 3    | 1 | bc7 |
| .....ugucuauggagGcgcucuc.....         | 14   | 1 | bc7 |
| .....ugucuauggagucgcucuc.....         | 19   | 0 | bc7 |
| .....ugucuauggagucgcucuc.....         | 66   | 0 | bc7 |
| .....ugucuauggaAucgcucuc.....         | 1    | 1 | bc7 |
| .....ugucuauggagGcgcucuc.....         | 198  | 1 | bc7 |
| .....ugucuauggagucgcucU.....          | 1    | 1 | bc7 |
| .....ugucuauggagGcgcucucuu.....       | 1378 | 1 | bc7 |
| .....ugucUuggagucgcucucuu.....        | 1    | 1 | bc7 |
| .....ugucauUgagucgcucucuu.....        | 1    | 1 | bc7 |
| .....ugAcauggagucgcucucuu.....        | 1    | 1 | bc7 |
| .....ugucuauggagucgcucucG.....        | 4    | 1 | bc7 |
| .....ugucuauggagucUcucucuu.....       | 1    | 1 | bc7 |
| .....ugucuauggagucgcucucuu.....       | 819  | 0 | bc7 |
| .....ugucuauggaAucgcucucuu.....       | 1    | 1 | bc7 |
| .....ugucuauggagAucgcucucuu.....      | 1    | 1 | bc7 |
| .....ugucuauggagucgcucucua.....       | 1    | 1 | bc7 |
| .....ugucuauggGgucgcucucuu.....       | 3    | 1 | bc7 |
| .....ugCcauggagucgcucucuu.....        | 1    | 1 | bc7 |
| .....ugucuauggagucgcucucGu.....       | 1    | 1 | bc7 |
| .....ugucuauggaguUgcucucuu.....       | 1    | 1 | bc7 |
| .....ugucuauggaCucgcucucuu.....       | 1    | 1 | bc7 |
| .....ugucuauggUgucgcucucuu.....       | 5    | 1 | bc7 |
| .....ugucuauggagCcgucucucuu.....      | 6    | 1 | bc7 |
| .....ugucuauggagGcgcucucucuc.....     | 579  | 1 | bc7 |
| .....ugucuauggGgucgcucucucuc.....     | 1    | 1 | bc7 |
| .....Ggucuauggagucgcucucucuc.....     | 1    | 1 | bc7 |
| .....ugucuauggagucgcucucucua.....     | 1    | 1 | bc7 |
| .....ugucuauggagucgcucucucua.....     | 1    | 1 | bc7 |
| .....ugucuauggagucgcucucucuu.....     | 349  | 0 | bc7 |
| .....ugUauggagucgcucucucuc.....       | 1    | 1 | bc7 |
| .....ugucuauggagucgcucucuuU.....      | 1    | 1 | bc7 |

cugaggugaagcugaagagagccgucuaauugacaguucaagaccacagagucguugugugcugucauggagucgcucucuucagauccggucaau

|                                    |       |   |     |
|------------------------------------|-------|---|-----|
| .....ugucauggagucAcucucuuca.....   | 16    | 1 | bc7 |
| .....ugGcauggagucgcucucuuca.....   | 5     | 1 | bc7 |
| .....ugucauggagucgcucucGuca.....   | 1     | 1 | bc7 |
| .....ugucauggaguuAgcucucuuca.....  | 6     | 1 | bc7 |
| .....ugucUuggagucgcucucuuca.....   | 2     | 1 | bc7 |
| .....ugucauggagucgcGcucuuca.....   | 2     | 1 | bc7 |
| .....ugucauggagucgcucucCuca.....   | 2     | 1 | bc7 |
| .....uUucauggagucgcucucuuca.....   | 2     | 1 | bc7 |
| .....uguuAuggagucgcucucuuca.....   | 1     | 1 | bc7 |
| .....ugucGuggagucgcucucuuca.....   | 8     | 1 | bc7 |
| .....ugucaugAagucgcucucuuca.....   | 2     | 1 | bc7 |
| .....ugucauggagucgcucucuuucG.....  | 55    | 1 | bc7 |
| .....ugucauggCgucgcucucuuca.....   | 3     | 1 | bc7 |
| .....ugucauggagucgcucCcuca.....    | 4     | 1 | bc7 |
| .....ugucauggagucUcucucuuca.....   | 1     | 1 | bc7 |
| .....Agucauggagucgcucucuuca.....   | 4     | 1 | bc7 |
| .....uCucauggagucgcucucuuca.....   | 3     | 1 | bc7 |
| .....ugugauggagucgcucucuuca.....   | 4     | 1 | bc7 |
| .....ugucauggagucgcucAcuuca.....   | 3     | 1 | bc7 |
| .....Cgucauggagucgcucucuuca.....   | 8     | 1 | bc7 |
| .....ugucauUgagucgcucucuuca.....   | 2     | 1 | bc7 |
| .....ugucauggagucgcucucuuucC.....  | 52    | 1 | bc7 |
| .....ugucaAggagucgcucucuuca.....   | 1     | 1 | bc7 |
| .....ugucauggagucgcucucuuucU.....  | 1939  | 1 | bc7 |
| .....ugucaugUagucgcucucuuca.....   | 2     | 1 | bc7 |
| .....ugucaCggagucgcucucuuca.....   | 3     | 1 | bc7 |
| .....ugucauggagucgcucucuuAca.....  | 26    | 1 | bc7 |
| .....ugucauggaguuGgcucucuuca.....  | 4     | 1 | bc7 |
| .....ugucaGggagucgcucucuuca.....   | 2     | 1 | bc7 |
| .....ugucauggaCucgcucucuuca.....   | 3     | 1 | bc7 |
| .....ugucauggagucgcucucuuUa.....   | 6     | 1 | bc7 |
| .....ugucauggagucgGucucuuca.....   | 2     | 1 | bc7 |
| .....ugucauggagCcgucucuuca.....    | 49    | 1 | bc7 |
| .....ugucauggagucgcucuuUuca.....   | 15    | 1 | bc7 |
| .....ugucauggagucgcuuAucuuca.....  | 4     | 1 | bc7 |
| .....ugucauggagucgcucucuuca.....   | 19121 | 0 | bc7 |
| .....ugucauggaUucgcucucuuca.....   | 5     | 1 | bc7 |
| .....ugucCuggagucgcucucuuca.....   | 1     | 1 | bc7 |
| .....ugucauggagucgcucucuuGca.....  | 14    | 1 | bc7 |
| .....ugucauAagagucgcucucuuca.....  | 8     | 1 | bc7 |
| .....ugCcauggagucgcucucuuca.....   | 4     | 1 | bc7 |
| .....ugucauggagucgcucucuuCca.....  | 39    | 1 | bc7 |
| .....ugucauggUgucgcucucuuca.....   | 15    | 1 | bc7 |
| .....ugucaugCagucgcucucuuca.....   | 2     | 1 | bc7 |
| .....ugucauggagucgAucucuuca.....   | 6     | 1 | bc7 |
| .....ugucauggagucgcucuuAuca.....   | 7     | 1 | bc7 |
| .....ugucauggagucgUucucuuca.....   | 4     | 1 | bc7 |
| .....uguuAuggagucgcucucuuca.....   | 6     | 1 | bc7 |
| .....ugucauggagucgcuuGucuuca.....  | 2     | 1 | bc7 |
| .....ugAcauggagucgcucucuuca.....   | 6     | 1 | bc7 |
| .....ugucauggaguuGgcucucuuca.....  | 9     | 1 | bc7 |
| .....ugucauggagAagcucucuuca.....   | 16    | 1 | bc7 |
| .....uAucauggagucgcucucuuca.....   | 2     | 1 | bc7 |
| .....ugucauggagucgcucucuuGa.....   | 1     | 1 | bc7 |
| .....ugucauggagGcgcucucuuca.....   | 6267  | 1 | bc7 |
| .....ugucauggGgucgcucucuuca.....   | 14    | 1 | bc7 |
| .....ugucauggagucgcucucuuAa.....   | 2     | 1 | bc7 |
| .....ugucauggagucgcucucAuca.....   | 1     | 1 | bc7 |
| .....ugucauggagucgcCcuca.....      | 4     | 1 | bc7 |
| .....ugucauggagucgcuuUucuuca.....  | 7     | 1 | bc7 |
| .....Ggucauggagucgcucucuuca.....   | 1     | 1 | bc7 |
| .....ugucauggagucCucucuuca.....    | 3     | 1 | bc7 |
| .....ugucauGgagucgcucucuuca.....   | 1     | 1 | bc7 |
| .....ugucauggagucgcucucuucaA.....  | 24    | 1 | bc7 |
| .....ugucauggagucgcucucuucaU.....  | 195   | 1 | bc7 |
| .....ugucauggagucgcucucuuucag..... | 1     | 0 | bc7 |
| .....ugucauggagGcgcucucuuucag..... | 2     | 1 | bc7 |
| .....ugucauggagucgcucucuucaC.....  | 3     | 1 | bc7 |
| .....ugucauggagucgcucucuucaUa..... | 1     | 1 | bc7 |

cel-miR-46\*

cel-miR-46

cugaggugaagcugaagagagccgucuaauugacaguucaagaccacgagucguugugugcugucauggagucgcucucuucagaugaucgggucaau

|                                    |    |   |     |
|------------------------------------|----|---|-----|
| .....ugucauggagucgcucucuucagU..... | 1  | 1 | bc7 |
| .....ugucauggagucgcucucuucUau..... | 1  | 1 | bc7 |
| .....gucauggagGcgcucucuuc.....     | 1  | 1 | bc7 |
| .....gucauggagucgUucucuuca.....    | 1  | 1 | bc7 |
| .....gucauggagGcgcucucuuca.....    | 16 | 1 | bc7 |
| .....gucauggagucgcucucuucU.....    | 3  | 1 | bc7 |
| .....gucauggagucgcucucuuca.....    | 27 | 0 | bc7 |
| .....ucauggagucgcucucuuca.....     | 1  | 0 | bc7 |
| .....ucauggagGcgcucucuuca.....     | 1  | 1 | bc7 |
| .....ucauggagAcgcucucuuca.....     | 1  | 1 | bc7 |
| .....cauggagGcgcucucuuca.....      | 1  | 1 | bc7 |
| .....cauggagucgcucucuuca.....      | 1  | 0 | bc7 |
| .....auggagucgcucucuuca.....       | 19 | 0 | bc7 |
| .....auggagGcgcucucuuca.....       | 15 | 1 | bc7 |
| .....auggagucgcucucuucU.....       | 1  | 1 | bc7 |
