# Supplementary material for: Reliable reference miRNAs for quantitative gene expression analysis of stress responses in Caenorhabditis elegans
Source: PubMed Central journal article supplement (PMC3997968; doi:10.1186/1471-2164-15-222), 2014-03-21
Supplement: 1471-2164-15-222-S6.pdf [file 1471-2164-15-222-S6.pdf]

gagagccgacugaaacugaaagagagcagucuaaagacagucggguuacucgaaucuuacugucauggaggcgucucuucaugaugucuggccc

|                                   |      |   |     |
|-----------------------------------|------|---|-----|
| .....ugucauggaggcgucucuu.....     | 234  | 0 | bc4 |
| .....ugucauggagAcgcucucuu.....    | 1    | 1 | bc4 |
| .....ugucauggaggcgAucucuu.....    | 1    | 1 | bc4 |
| .....ugucauggaggcgucucuuU.....    | 3    | 1 | bc4 |
| .....ugucauggaggGgcucucuu.....    | 1    | 1 | bc4 |
| .....ugucauggaggcgucucuuAc.....   | 1    | 1 | bc4 |
| .....ugucauggaggcgucucuu.....     | 93   | 0 | bc4 |
| .....ugucauggagUcgucucuu.....     | 78   | 1 | bc4 |
| .....ugucauggagCgcucucuu.....     | 1    | 1 | bc4 |
| .....ugucauggaggcgucucuuca.....   | 1930 | 0 | bc4 |
| .....ugucauggGggcgucucuuca.....   | 4    | 1 | bc4 |
| .....ugucauggaggcgucuuuua.....    | 1    | 1 | bc4 |
| .....ugucauggaggcgucucuuGca.....  | 2    | 1 | bc4 |
| .....ugucauggaggcgucucuuC.....    | 8    | 1 | bc4 |
| .....ugucauggaggcgucucuuCca.....  | 2    | 1 | bc4 |
| .....ugucauggaggAcucucuuca.....   | 1    | 1 | bc4 |
| .....ugucauggaggcgucucuuUa.....   | 1    | 1 | bc4 |
| .....ugucauggGggcgucucuuca.....   | 2    | 1 | bc4 |
| .....ugucauggaggcgAucucuuca.....  | 1    | 1 | bc4 |
| .....ugucauggaggcgUucucuuca.....  | 3    | 1 | bc4 |
| .....ugucauggaggcgUucucuuca.....  | 1    | 1 | bc4 |
| .....ugucauggaUgcgucucuuca.....   | 1    | 1 | bc4 |
| .....ugucauggaggGgcucucuuca.....  | 2    | 1 | bc4 |
| .....ugucauggaggUucucuuca.....    | 3    | 1 | bc4 |
| .....ugucauggUggcgucucuuca.....   | 1    | 1 | bc4 |
| .....ugucauggagAcgcucucuuca.....  | 4    | 1 | bc4 |
| .....ugucauggagUcgucucuuca.....   | 5628 | 1 | bc4 |
| .....ugucauggagCcgucucuuca.....   | 8    | 1 | bc4 |
| .....ugucauggaggcgucucuuC.....    | 5    | 1 | bc4 |
| .....ugucauggaggCcucucuuca.....   | 2    | 1 | bc4 |
| .....ugucauggaggcgucucuuU.....    | 289  | 1 | bc4 |
| .....ugucGuggaggcgucucuuca.....   | 1    | 1 | bc4 |
| .....Cgucaugaggcgucucuuca.....    | 1    | 1 | bc4 |
| .....ugucaCggaggcgucucuuca.....   | 1    | 1 | bc4 |
| .....ugGcauggaggcgucucuuca.....   | 1    | 1 | bc4 |
| .....ugucauggaggcgucucuuAca.....  | 2    | 1 | bc4 |
| .....ugucauGaggcgucucuuca.....    | 1    | 1 | bc4 |
| .....ugucauggaggcgucucuucaA.....  | 4    | 1 | bc4 |
| .....ugucauggagUcgucucuuacag..... | 3    | 1 | bc4 |
| .....ugucauggaggcgucucuucaU.....  | 77   | 1 | bc4 |
| .....gucaugaggcgucucuuca.....     | 3    | 0 | bc4 |
| .....gucaugaggUcgucucuuca.....    | 8    | 1 | bc4 |
| .....ucauggagUcgucucuuca.....     | 1    | 1 | bc4 |
| .....augaggcgucucuuca.....        | 1    | 0 | bc4 |
| .....auggagUcgucucuuca.....       | 3    | 1 | bc4 |
| .....aagagagcCgucuaaagac.....     | 1    | 1 | bc1 |
| .....aagagagcagucuaaagaca.....    | 1    | 0 | bc1 |
| .....aagagagcCgucuaaagacag.....   | 73   | 1 | bc1 |
| .....aagagagCagucuaaagacag.....   | 1    | 1 | bc1 |
| .....aagagagcagucuaaagacag.....   | 42   | 0 | bc1 |
| .....aagagagcagucuaaagacagu.....  | 786  | 0 | bc1 |
| .....aagagagcagucuaaagacagC.....  | 2    | 1 | bc1 |
| .....aagagagcagucuaaagCcagu.....  | 2    | 1 | bc1 |
| .....aagagGgcagucuaaagacagu.....  | 2    | 1 | bc1 |
| .....aagagagcCgucuaaagacagu.....  | 1238 | 1 | bc1 |
| .....aagagagcagucuaaagalaagu..... | 1    | 1 | bc1 |
| .....aagGgagcagucuaaagacagu.....  | 1    | 1 | bc1 |
| .....aagagaUcagucuaaagacagu.....  | 1    | 1 | bc1 |
| .....aagagagcagucuaaagacagG.....  | 3    | 1 | bc1 |
| .....aagagagcagucuaaagacaUu.....  | 1    | 1 | bc1 |
| .....aagagagcagucuaaagacGgu.....  | 1    | 1 | bc1 |
| .....aagagCgcagucuaaagacagu.....  | 1    | 1 | bc1 |
| .....aagagaCcagucuaaagacagu.....  | 1    | 1 | bc1 |
| .....aagagagcagucuaaagacaguc..... | 2    | 0 | bc1 |
| .....aagagagcagucuaaagacaguU..... | 16   | 1 | bc1 |
| .....agagagcCgucuaaagacagu.....   | 15   | 1 | bc1 |
| .....agagagcagucuaaagacagu.....   | 1    | 0 | bc1 |
| .....gagagcCgucuaaagacagu.....    | 1    | 1 | bc1 |

gagagccgacugaaacugaagagagcagucuaauugacagucgguuacucgaaacuuuacugucauggaggcgucucuucagaugaugucuggccc

|                                     |      |   |     |
|-------------------------------------|------|---|-----|
| .....gagcagucuaauugacagu.....       | 3    | 0 | bc1 |
| .....gagcCgucuaauugacagu.....       | 1    | 1 | bc1 |
| .....cgguuacucgaaacuuuac.....       | 3    | 0 | bc1 |
| .....cugucauggaggcgucucuuca.....    | 2    | 0 | bc1 |
| .....cugucauggagUcgucucuuca.....    | 5    | 1 | bc1 |
| .....ugucauggaggcgucuc.....         | 4    | 0 | bc1 |
| .....ugucauggagUcgucuc.....         | 5    | 1 | bc1 |
| .....ugucauggagUcgucucu.....        | 6    | 1 | bc1 |
| .....ugucauggaggcgucucu.....        | 24   | 0 | bc1 |
| .....ugucauggUggcgucucu.....        | 2    | 1 | bc1 |
| .....ugGcauggaggcgucucu.....        | 1    | 1 | bc1 |
| .....ugucauggaggcgucucu.....        | 238  | 0 | bc1 |
| .....ugucauggagUcgucucu.....        | 143  | 1 | bc1 |
| .....ugucauggaggcgucucuuc.....      | 155  | 0 | bc1 |
| .....ugucauggGggcgucucuuc.....      | 1    | 1 | bc1 |
| .....ugucauggagUcgucucuuc.....      | 67   | 1 | bc1 |
| .....ugucauggaggcgucucuU.....       | 4    | 1 | bc1 |
| .....ugucauggaggcgucucCuca.....     | 1    | 1 | bc1 |
| .....ugucauggaggUcgucucuca.....     | 1    | 1 | bc1 |
| .....ugucauggaggcgucucAucucuca..... | 2    | 1 | bc1 |
| .....ugucauggaggcgucucuGa.....      | 1    | 1 | bc1 |
| .....ugucauggaggcgucucuCca.....     | 3    | 1 | bc1 |
| .....ugucaugUaggcgucucuuca.....     | 1    | 1 | bc1 |
| .....ugucauUgaggcgucucuuca.....     | 1    | 1 | bc1 |
| .....ugucauggaggAgcucucuuca.....    | 3    | 1 | bc1 |
| .....ugucauggagAcgucucuuca.....     | 4    | 1 | bc1 |
| .....ugucauggaggcgucucuucC.....     | 10   | 1 | bc1 |
| .....uguUauggaggcgucucuuca.....     | 1    | 1 | bc1 |
| .....uAucauggaggcgucucuuca.....     | 1    | 1 | bc1 |
| .....ugucauggaggcgucucuuca.....     | 1    | 1 | bc1 |
| .....ugucGuggaggcgucucuuca.....     | 1    | 1 | bc1 |
| .....ugucaAggaggcgucucuuca.....     | 1    | 1 | bc1 |
| .....ugucauggaggcgucucuuca.....     | 8    | 1 | bc1 |
| .....ugucauggaggCccucucuuca.....    | 1    | 1 | bc1 |
| .....ugucauAaggcgucucuuca.....      | 1    | 1 | bc1 |
| .....ugucauggGggcgucucuuca.....     | 6    | 1 | bc1 |
| .....ugucauggaggcgucucuucU.....     | 355  | 1 | bc1 |
| .....ugucauggUggcgucucuuca.....     | 5    | 1 | bc1 |
| .....ugucauggagUcgucucuuca.....     | 7108 | 1 | bc1 |
| .....ugucauggaggcgucucuAca.....     | 3    | 1 | bc1 |
| .....uCucauggaggcgucucuuca.....     | 1    | 1 | bc1 |
| .....ugucauggaggcgucucuucG.....     | 7    | 1 | bc1 |
| .....ugucauggaggGgcucucuuca.....    | 11   | 1 | bc1 |
| .....ugucauggaggcgucucuUuca.....    | 4    | 1 | bc1 |
| .....ugucauggCggcgucucuuca.....     | 2    | 1 | bc1 |
| .....ugucauggaggcgucucCuuca.....    | 1    | 1 | bc1 |
| .....ugucauggaggcgucucuuca.....     | 2911 | 0 | bc1 |
| .....ugucauggaggcgucucuuaAa.....    | 1    | 1 | bc1 |
| .....ugucauggaggUgcucucuuca.....    | 2    | 1 | bc1 |
| .....ugucauggaggAcucucuuca.....     | 2    | 1 | bc1 |
| .....ugucauggaCggcgucucuuca.....    | 2    | 1 | bc1 |
| .....ugucauggagCcgucucuuca.....     | 13   | 1 | bc1 |
| .....ugucauggaggcgucucuucaA.....    | 4    | 1 | bc1 |
| .....ugucauggaggcgucucuucaU.....    | 99   | 1 | bc1 |
| .....ugucauggaggcgucucuucaC.....    | 1    | 1 | bc1 |
| .....gucauggagUcgucucuuc.....       | 1    | 1 | bc1 |
| .....gucauggagUcgucucuuca.....      | 15   | 1 | bc1 |
| .....gucauggaggcgucucuucU.....      | 1    | 1 | bc1 |
| .....gucauggaggcgucucuuca.....      | 3    | 0 | bc1 |
| .....gucauggaggcgucucuucaU.....     | 1    | 1 | bc1 |
| .....ucauggagUcgucucuuca.....       | 1    | 1 | bc1 |
| .....ucauggaggcgucucuucaga.....     | 1    | 0 | bc1 |
| .....auggaggcgucucuuca.....         | 3    | 0 | bc1 |
| .....auggaggcgucucuucU.....         | 1    | 1 | bc1 |
| .....auggagUcgucucuuca.....         | 2    | 1 | bc1 |
| .....aagagagcCgucuaauugac.....      | 2    | 1 | bc3 |
| .....aagagagcagucuaauugaca.....     | 1    | 0 | bc3 |
| .....aagagagcCgucuaauugaca.....     | 1    | 1 | bc3 |

gagagccgacugaaacugaaagagagcagucuaauugacagucgguuacucgaaacuuuacugucauggaggcgucucuucaagaugaugucggccc

|                                                      |      |   |     |
|------------------------------------------------------|------|---|-----|
| .....aagagagcagucuaauugacag.....                     | 67   | 0 | bc3 |
| .....aagagagcagucuaauUacag.....                      | 1    | 1 | bc3 |
| .....aagagagcGgucuaauugacag.....                     | 1    | 1 | bc3 |
| .....aagagagcCgucuaauugacag.....                     | 203  | 1 | bc3 |
| .....Uagagagcagucuaauugacagu.....                    | 1    | 1 | bc3 |
| .....aagagagcagucuaauugaUagu.....                    | 1    | 1 | bc3 |
| .....aagagagcaUucuaauugacagu.....                    | 2    | 1 | bc3 |
| .....aagagagcagucuuGuugacagu.....                    | 1    | 1 | bc3 |
| .....aagagagcCgucuaauugacagu.....                    | 2684 | 1 | bc3 |
| .....Gagagagcagucuaauugacagu.....                    | 1    | 1 | bc3 |
| .....aagagagcagucuaauugacagG.....                    | 4    | 1 | bc3 |
| .....aagagagcaguuauugacagu.....                      | 1    | 1 | bc3 |
| .....aagagagcUgucuaauugacagu.....                    | 1    | 1 | bc3 |
| .....aagagagcagucuaauugacagu.....                    | 1096 | 0 | bc3 |
| .....aagagagcagucuaauugacaguU.....                   | 17   | 1 | bc3 |
| .....aagagagcagucuaauugacaguc.....                   | 1    | 0 | bc3 |
| .....aagagagcagucuaauugacagucgguuacucgaaacuuuac..... | 1    | 0 | bc3 |
| .....agagagcCgucuaauugacag.....                      | 3    | 1 | bc3 |
| .....agagagcCgucuaauugacagu.....                     | 22   | 1 | bc3 |
| .....agagagcagucuaauugacagu.....                     | 1    | 0 | bc3 |
| .....gagagcCgucuaauugacagu.....                      | 1    | 1 | bc3 |
| .....agagcagucuaauugacagu.....                       | 1    | 0 | bc3 |
| .....gagcagucuaauugacagu.....                        | 2    | 0 | bc3 |
| .....gagcCgucuaauugacagu.....                        | 4    | 1 | bc3 |
| .....cgguuacucgaaacuuuac.....                        | 5    | 0 | bc3 |
| .....cugucauggagUcgcucucuuuc.....                    | 1    | 1 | bc3 |
| .....cugucauggaggcgucucuuuc.....                     | 1    | 0 | bc3 |
| .....cugucauggaggcgucucuuuca.....                    | 2    | 0 | bc3 |
| .....cugucauggagUcgcucucuuca.....                    | 10   | 1 | bc3 |
| .....ugucauggaggcgucuc.....                          | 10   | 0 | bc3 |
| .....ugucauggagUcgcucuc.....                         | 15   | 1 | bc3 |
| .....ugucauggaggcgucucG.....                         | 1    | 1 | bc3 |
| .....ugucauggGggcgucuc.....                          | 1    | 1 | bc3 |
| .....ugucauggaggcgucucC.....                         | 1    | 1 | bc3 |
| .....ugucauggaggcgucuc.....                          | 74   | 0 | bc3 |
| .....ugucauggagUcgcucuc.....                         | 27   | 1 | bc3 |
| .....ugucaugUaggcgucucuu.....                        | 1    | 1 | bc3 |
| .....Cgucauggaggcgucucuu.....                        | 1    | 1 | bc3 |
| .....ugucauggaggcgucucCu.....                        | 2    | 1 | bc3 |
| .....ugucauggagAcgcucucuu.....                       | 1    | 1 | bc3 |
| .....ugucauggagCcgucucuu.....                        | 3    | 1 | bc3 |
| .....ugGcauggaggcgucucuu.....                        | 1    | 1 | bc3 |
| .....ugucauggaggGgcucucuu.....                       | 1    | 1 | bc3 |
| .....ugucauggGggcgucucuu.....                        | 2    | 1 | bc3 |
| .....ugUauggaggcgucucuu.....                         | 1    | 1 | bc3 |
| .....ugucauggaggcgucucuu.....                        | 569  | 0 | bc3 |
| .....ugucauggUggcgucucuu.....                        | 2    | 1 | bc3 |
| .....ugucauggagUcgcucucuu.....                       | 385  | 1 | bc3 |
| .....ugucGuggaggcgucucuu.....                        | 1    | 1 | bc3 |
| .....ugucauggaggcgAcucuu.....                        | 1    | 1 | bc3 |
| .....ugucauggaggcgUucuu.....                         | 1    | 1 | bc3 |
| .....ugucauggCggcgucucuu.....                        | 1    | 1 | bc3 |
| .....ugucauggagUcgcucucuu.....                       | 172  | 1 | bc3 |
| .....ugucauggaggcgucucuu.....                        | 303  | 0 | bc3 |
| .....ugucauggaggcgucucuuA.....                       | 1    | 1 | bc3 |
| .....ugAcauggaggcgucucuu.....                        | 1    | 1 | bc3 |
| .....ugucauggaggGgcucucuu.....                       | 2    | 1 | bc3 |
| .....ugucauggaggcgucucuuU.....                       | 5    | 1 | bc3 |
| .....Agucauggaggcgucucuu.....                        | 1    | 1 | bc3 |
| .....ugucaugAaggcgucucuuca.....                      | 1    | 1 | bc3 |
| .....ugucauggaggcCucucuuca.....                      | 3    | 1 | bc3 |
| .....Agucauggaggcgucucuuca.....                      | 2    | 1 | bc3 |
| .....ugucGuggaggcgucucuuca.....                      | 1    | 1 | bc3 |
| .....ugucauggaggcgucucuuU.....                       | 678  | 1 | bc3 |
| .....ugucauggaggcgUucuuca.....                       | 1    | 1 | bc3 |
| .....ugucauggaggcgucucuuC.....                       | 10   | 1 | bc3 |
| .....ugucauggaCcgucucuuca.....                       | 2    | 1 | bc3 |
| .....ugucaugUaggcgucucuuca.....                      | 1    | 1 | bc3 |
| .....ugucauggaggcgucucuuCca.....                     | 7    | 1 | bc3 |

gagagccgacugaaacugaaagagagcagucuaugacagucgguuacucgaaucuuacugucauggaggcgucucuucagaugucuggccc

|                                    |       |   |     |
|------------------------------------|-------|---|-----|
| .....ugucUuggaggcgucucuua.....     | 3     | 1 | bc3 |
| .....ugucauggaggAgcucucuua.....    | 6     | 1 | bc3 |
| .....ugucauggaggcgcuUucuua.....    | 6     | 1 | bc3 |
| .....ugucauggaggcgucucuUa.....     | 2     | 1 | bc3 |
| .....ugucauggaggUcucucuua.....     | 2     | 1 | bc3 |
| .....ugucauggaggcgucucuAa.....     | 3     | 1 | bc3 |
| .....ugucauggaggcgucucuua.....     | 4629  | 0 | bc3 |
| .....ugucauggaggCcgucucuua.....    | 30    | 1 | bc3 |
| .....ugucauggaggcgucucuAa.....     | 8     | 1 | bc3 |
| .....ugucauggaggcgcuUuuca.....     | 3     | 1 | bc3 |
| .....ugucauggaggcgucucuGca.....    | 4     | 1 | bc3 |
| .....ugucauggaUgcgucucuua.....     | 1     | 1 | bc3 |
| .....ugucauggCggcgucucuua.....     | 1     | 1 | bc3 |
| .....ugucauggGggcgucucuua.....     | 6     | 1 | bc3 |
| .....ugucauggAgcgucucuua.....      | 10    | 1 | bc3 |
| .....ugucauggaggcgAucucuua.....    | 1     | 1 | bc3 |
| .....ugucaUgaggcgucucuua.....      | 1     | 1 | bc3 |
| .....ugucauggaggcgucucuucG.....    | 5     | 1 | bc3 |
| .....uguUauggaggcgucucuua.....     | 2     | 1 | bc3 |
| .....ugucauggaggUgcucucuua.....    | 1     | 1 | bc3 |
| .....ugucauggaggGgcucucuua.....    | 9     | 1 | bc3 |
| .....ugucauggaggcgcuAucuua.....    | 1     | 1 | bc3 |
| .....ugucauggaggcgucucuCcuua.....  | 3     | 1 | bc3 |
| .....ugGcauggaggcgucucuua.....     | 2     | 1 | bc3 |
| .....ugucaCggaggcgucucuua.....     | 2     | 1 | bc3 |
| .....ugucauggaggAcucucuua.....     | 4     | 1 | bc3 |
| .....ugucauAaggcgucucuua.....      | 2     | 1 | bc3 |
| .....uAucauggaggcgucucuua.....     | 3     | 1 | bc3 |
| .....ugucauggUggcgucucuua.....     | 3     | 1 | bc3 |
| .....ugucauggagUcgcucucuua.....    | 14521 | 1 | bc3 |
| .....ugucauggagUcgcucucuucag.....  | 4     | 1 | bc3 |
| .....ugucauggaggcgucucuuaU.....    | 241   | 1 | bc3 |
| .....ugucauggaggcgucucuuaA.....    | 13    | 1 | bc3 |
| .....ugucauggagUcgcucucuucaga..... | 1     | 1 | bc3 |
| .....gcauggaggcgucucuuu.....       | 1     | 0 | bc3 |
| .....gcauggaggcgucucuuc.....       | 1     | 0 | bc3 |
| .....gcauggaggcgucucuua.....       | 8     | 0 | bc3 |
| .....gcauggagUcgcucucuua.....      | 18    | 1 | bc3 |
| .....gcauggaggcgucucuucU.....      | 1     | 1 | bc3 |
| .....ucauggagUcgcucucuua.....      | 2     | 1 | bc3 |
| .....cauggaggcgucucuua.....        | 1     | 0 | bc3 |
| .....auggaggcgucucuua.....         | 3     | 0 | bc3 |
| .....auggagUcgcucucuua.....        | 11    | 1 | bc3 |
| .....auggaggcgucucuucU.....        | 1     | 1 | bc3 |
| .....Caagagagcagucuaauugacagu..... | 1     | 1 | bc6 |
| .....aagagCgcagucuaauugacag.....   | 1     | 1 | bc6 |
| .....aagagagcagucuaauugacag.....   | 102   | 0 | bc6 |
| .....aagagagGagucuaauugacag.....   | 1     | 1 | bc6 |
| .....aagagagcagucuaauugaAag.....   | 1     | 1 | bc6 |
| .....Gagagagcagucuaauugacag.....   | 1     | 1 | bc6 |
| .....aagagagcCgucuaauugacag.....   | 166   | 1 | bc6 |
| .....aagagagcagucuaauugacGgu.....  | 2     | 1 | bc6 |
| .....aagagCgcagucuaauugacagu.....  | 1     | 1 | bc6 |
| .....aagagGgcagucuaauugacagu.....  | 3     | 1 | bc6 |
| .....aagagagcagucuaauugacagA.....  | 1     | 1 | bc6 |
| .....aagagagcaguGuauugacagu.....   | 1     | 1 | bc6 |
| .....aagagaCcagucuaauugacagu.....  | 2     | 1 | bc6 |
| .....aagagagcagucuaauugacaCu.....  | 1     | 1 | bc6 |
| .....aagagagcagucCuugacagu.....    | 1     | 1 | bc6 |
| .....aagagagcagucuaauugGcagu.....  | 1     | 1 | bc6 |
| .....aGgagagcagucuaauugacagu.....  | 1     | 1 | bc6 |
| .....aagagUgcagucuaauugacagu.....  | 3     | 1 | bc6 |
| .....aagagagcGgucuaauugacagu.....  | 1     | 1 | bc6 |
| .....aagagagcagucuaauugacagu.....  | 2417  | 0 | bc6 |
| .....aagagagcagucuaauugacaAu.....  | 3     | 1 | bc6 |
| .....aUgagagcagucuaauugacagu.....  | 1     | 1 | bc6 |
| .....aagagagcagucCauugacagu.....   | 1     | 1 | bc6 |
| .....aagagagcagucuaauUacagu.....   | 1     | 1 | bc6 |

gagagccgacugaaacugaaagagagcagucuaauugacagucgguuacucgaaacuuuacugucauggaggcgucucuucaugaugucuggccc

|                                                      |       |   |     |
|------------------------------------------------------|-------|---|-----|
| .....aagagagcagucuaauugaAagu.....                    | 2     | 1 | bc6 |
| .....aagagagcagCcuauugacaguc.....                    | 3     | 1 | bc6 |
| .....aagagagcagucUuugacaguc.....                     | 1     | 1 | bc6 |
| .....aagagagAagucuaauugacaguc.....                   | 1     | 1 | bc6 |
| .....aagagagcagucuaauugacCgu.....                    | 1     | 1 | bc6 |
| .....Gagagagcagucuaauugacaguc.....                   | 1     | 1 | bc6 |
| .....aagGgagcagucuaauugacaguc.....                   | 1     | 1 | bc6 |
| .....aagagagcCgucuaauugacaguc.....                   | 2869  | 1 | bc6 |
| .....aagagagcagucuaauugacagG.....                    | 10    | 1 | bc6 |
| .....aagagagcagucuaauugacaguc.....                   | 1     | 0 | bc6 |
| .....aagagagcagucuaauugacagucG.....                  | 1     | 1 | bc6 |
| .....aagagagcagucuaauugacagucA.....                  | 1     | 1 | bc6 |
| .....aagagagcagucuaauugacagucU.....                  | 39    | 1 | bc6 |
| .....aagagagcagucuaauugacagucU.....                  | 1     | 1 | bc6 |
| .....aagagagcagucuaauugacagucgguuacucgaaacuuuac..... | 1     | 0 | bc6 |
| .....agagagcagucuaauugacag.....                      | 1     | 0 | bc6 |
| .....agagagcCgucuaauugacaguc.....                    | 15    | 1 | bc6 |
| .....agagagcagucuaauugacaguc.....                    | 5     | 0 | bc6 |
| .....gagagcCgucuaauugacag.....                       | 1     | 1 | bc6 |
| .....agagcCgucuaauugacaguc.....                      | 1     | 1 | bc6 |
| .....gagcagucuaauugacaguc.....                       | 11    | 0 | bc6 |
| .....gagcCgucuaauugacaguc.....                       | 6     | 1 | bc6 |
| .....cgguuacucgaaacuuuac.....                        | 4     | 0 | bc6 |
| .....cugucauggagUcgcucucuu.....                      | 2     | 1 | bc6 |
| .....cugucauggaggcgucucuuucU.....                    | 1     | 1 | bc6 |
| .....cugucauggaggcgucucuuca.....                     | 4     | 0 | bc6 |
| .....cugucauggagUcgcucucuuca.....                    | 24    | 1 | bc6 |
| .....ugucauggaggcgucucuc.....                        | 8     | 0 | bc6 |
| .....ugucauggagUcgcucuc.....                         | 11    | 1 | bc6 |
| .....ugucauggaggcgucucuc.....                        | 94    | 0 | bc6 |
| .....ugucauggaggcgucucucG.....                       | 1     | 1 | bc6 |
| .....ugucauggaggGgcucucuc.....                       | 1     | 1 | bc6 |
| .....ugucauggagUcgcucucuc.....                       | 27    | 1 | bc6 |
| .....ugucauggaggcgucucucGcu.....                     | 1     | 1 | bc6 |
| .....ugucauggGggcgucucuc.....                        | 1     | 1 | bc6 |
| .....ugGcauggaggcgucucuc.....                        | 1     | 1 | bc6 |
| .....ugucauggaggcgucucucGuu.....                     | 1     | 1 | bc6 |
| .....ugucauggagCcgucucucuu.....                      | 3     | 1 | bc6 |
| .....ugucauggaggcgucucucuu.....                      | 710   | 0 | bc6 |
| .....ugucauggaggcgucucuuUuu.....                     | 1     | 1 | bc6 |
| .....ugucauggaggcgucucucuaA.....                     | 1     | 1 | bc6 |
| .....ugucUuggaggcgucucucuu.....                      | 1     | 1 | bc6 |
| .....ugucauggagUcgcucucuu.....                       | 417   | 1 | bc6 |
| .....ugucaugAaggcgucucucuu.....                      | 1     | 1 | bc6 |
| .....ugucauggagAagcgucucucuu.....                    | 2     | 1 | bc6 |
| .....ugucauggaggAgcgucucucuu.....                    | 2     | 1 | bc6 |
| .....ugucauggaggcgucucucuu.....                      | 1     | 1 | bc6 |
| .....ugucauggCggcgucucucuu.....                      | 1     | 1 | bc6 |
| .....ugucauggaUcgcucucucuu.....                      | 1     | 1 | bc6 |
| .....ugucauggaggcgucucucug.....                      | 2     | 1 | bc6 |
| .....ugucauggaggcgucucucuu.....                      | 1     | 1 | bc6 |
| .....ugucauggaggcgucucuuU.....                       | 6     | 1 | bc6 |
| .....ugucauggaggcgucucuuuc.....                      | 383   | 0 | bc6 |
| .....ugucauggaggcgucucuuuc.....                      | 1     | 1 | bc6 |
| .....ugucauggaggcgucucucugc.....                     | 1     | 1 | bc6 |
| .....ugucauggaggcgucucucuc.....                      | 1     | 1 | bc6 |
| .....ugucauggagUcgcucucucuc.....                     | 188   | 1 | bc6 |
| .....ugCcauggaggcgucucucucuc.....                    | 1     | 1 | bc6 |
| .....Ggucauggaggcgucucucucuc.....                    | 1     | 1 | bc6 |
| .....ugucauggaggcgucucucuuUa.....                    | 2     | 1 | bc6 |
| .....ugucauUgaggcgucucucuuca.....                    | 3     | 1 | bc6 |
| .....ugucaCggaggcgucucuuca.....                      | 1     | 1 | bc6 |
| .....ugucauggaggAcucucuuca.....                      | 1     | 1 | bc6 |
| .....ugucauggaggCccucucuuca.....                     | 4     | 1 | bc6 |
| .....ugucauggaggcgucucucuuca.....                    | 1     | 1 | bc6 |
| .....ugucauggaggcgucucuuucU.....                     | 1016  | 1 | bc6 |
| .....ugucauggaggcgucuuUucuuca.....                   | 2     | 1 | bc6 |
| .....ugAcauggaggcgucucuuca.....                      | 3     | 1 | bc6 |
| .....ugucauggagUcgcucucuuca.....                     | 15360 | 1 | bc6 |

gagagccgacugaaacugaagagagcagucuaauugacagucgguuacucgaaucuuacugucauggaggcgucucuucagauaugucuggccc

|                                   |      |   |     |
|-----------------------------------|------|---|-----|
| .....ugucauggaggGgcucucuua.....   | 12   | 1 | bc6 |
| .....ugucCuggaggcgucucuua.....    | 2    | 1 | bc6 |
| .....ugucauggaggAgcucucuua.....   | 7    | 1 | bc6 |
| .....ugucauggaAlgccucucuua.....   | 1    | 1 | bc6 |
| .....ugucauggaggcgCucucuua.....   | 5    | 1 | bc6 |
| .....ugucauggaggcgCgcucucuua..... | 2    | 1 | bc6 |
| .....ugucauggCggcgucucuua.....    | 3    | 1 | bc6 |
| .....ugucauggaggcgucucuucC.....   | 18   | 1 | bc6 |
| .....ugCcauggaggcgucucuua.....    | 4    | 1 | bc6 |
| .....ugucauggaggcgucuuUuua.....   | 4    | 1 | bc6 |
| .....ugucauggGggcgucucuua.....    | 8    | 1 | bc6 |
| .....uguUauggaggcgucucuua.....    | 1    | 1 | bc6 |
| .....ugucauggaggcgucucuGca.....   | 3    | 1 | bc6 |
| .....ugucauggaggcgucucuAa.....    | 2    | 1 | bc6 |
| .....ugucauggaggcgucucuAa.....    | 4    | 1 | bc6 |
| .....ugucaugCaggcgucucuua.....    | 2    | 1 | bc6 |
| .....Cgucauggaggcgucucuua.....    | 5    | 1 | bc6 |
| .....ugucauggaggcgcuAucuuua.....  | 1    | 1 | bc6 |
| .....ugucauggaggcgucucuucG.....   | 24   | 1 | bc6 |
| .....uguAauggaggcgucucuua.....    | 1    | 1 | bc6 |
| .....ugucauggaggUgcucucuua.....   | 6    | 1 | bc6 |
| .....ugucauGaggcgucucuua.....     | 1    | 1 | bc6 |
| .....ugucauggaggcgucucuGuua.....  | 3    | 1 | bc6 |
| .....ugucauggaggcgucucuCca.....   | 20   | 1 | bc6 |
| .....ugucauggagAcgcucucuua.....   | 14   | 1 | bc6 |
| .....ugucauggaggcgAcucucuua.....  | 1    | 1 | bc6 |
| .....ugucauggUggcgucucuua.....    | 4    | 1 | bc6 |
| .....ugGcauggaggcgucucuua.....    | 1    | 1 | bc6 |
| .....ugucauggaggcgucucCuca.....   | 2    | 1 | bc6 |
| .....ugucauggagCgcucucuua.....    | 26   | 1 | bc6 |
| .....ugucauggaggcgucucuua.....    | 5359 | 0 | bc6 |
| .....ugucauggaggcgucGcuua.....    | 2    | 1 | bc6 |
| .....ugucGuggaggcgucucuua.....    | 3    | 1 | bc6 |
| .....Ggucauggaggcgucucuua.....    | 1    | 1 | bc6 |
| .....ugucaugUaggcgucucuua.....    | 2    | 1 | bc6 |
| .....ugucUuggaggcgucucuua.....    | 1    | 1 | bc6 |
| .....ugucauggagUcgucucuucag.....  | 4    | 1 | bc6 |
| .....ugucauggUggcgucucuucag.....  | 1    | 1 | bc6 |
| .....ugucauggaggcgucucuuaU.....   | 249  | 1 | bc6 |
| .....ugucauggaggcgucucuuaA.....   | 10   | 1 | bc6 |
| .....ugucauggaggcgucucuuaC.....   | 1    | 1 | bc6 |
| .....ugucauggaggcgucucuuaAa.....  | 1    | 1 | bc6 |
| .....gucauggaggcgucucu.....       | 3    | 0 | bc6 |
| .....gucauggagUcgucucuua.....     | 31   | 1 | bc6 |
| .....gucauggaggcgucucuua.....     | 10   | 0 | bc6 |
| .....gucauggaggcgucucuucU.....    | 7    | 1 | bc6 |
| .....ucauggaggcgucucuua.....      | 1    | 0 | bc6 |
| .....ucauggagUcgucucuua.....      | 1    | 1 | bc6 |
| .....auggagUcgucucuua.....        | 19   | 1 | bc6 |
| .....auggaggcgucucuua.....        | 14   | 0 | bc6 |
| .....aagagagcagucuaauugac.....    | 1    | 0 | bc5 |
| .....aagagagcCgucuaauugac.....    | 1    | 1 | bc5 |
| .....aagagagcagucuaauugaca.....   | 2    | 0 | bc5 |
| .....aagagagcagucuaauugaUag.....  | 1    | 1 | bc5 |
| .....aagagagcCgucuaauugacag.....  | 265  | 1 | bc5 |
| .....aagagagcagucuaauugacag.....  | 136  | 0 | bc5 |
| .....aagagagcagucuaauugacCgu..... | 1    | 1 | bc5 |
| .....aGgagagcagucuaauugacagu..... | 2    | 1 | bc5 |
| .....aagagGgcagucuaauugacagu..... | 2    | 1 | bc5 |
| .....aagagagcagucuaauugacagG..... | 4    | 1 | bc5 |
| .....aagagagcagucuaauugUcagu..... | 1    | 1 | bc5 |
| .....aagagagcagucuaucGacagu.....  | 1    | 1 | bc5 |
| .....aagagagcCgucuaauugacagu..... | 3534 | 1 | bc5 |
| .....aagagagcagucuaauugacGgu..... | 5    | 1 | bc5 |
| .....aagagagcagucuaauugaUagu..... | 2    | 1 | bc5 |
| .....aagagCgcagucuaauugacagu..... | 1    | 1 | bc5 |
| .....aagagagcagAcuaauugacagu..... | 2    | 1 | bc5 |
| .....aagagaAcagucuaauugacagu..... | 1    | 1 | bc5 |

gagagccgacugaaacugaagagagcagucuaauugacagucgguuacucgaaucuuuacugucauggaggcgccucucuucagauaugucuggccc

|                                     |      |   |     |
|-------------------------------------|------|---|-----|
| .....aagagagcagucuaauCacagu.....    | 1    | 1 | bc5 |
| .....aagagagcagucuaauugacagC.....   | 2    | 1 | bc5 |
| .....aagaAagcagucuaauugacagu.....   | 1    | 1 | bc5 |
| .....aaAagagcagucuaauugacagu.....   | 1    | 1 | bc5 |
| .....aagagagcagucuaauugacagu.....   | 2526 | 0 | bc5 |
| .....aagagagcagucuaauugCcagu.....   | 1    | 1 | bc5 |
| .....aagCgagcagucuaauugacagu.....   | 1    | 1 | bc5 |
| .....aagagagcagucuaauugacaUu.....   | 1    | 1 | bc5 |
| .....aagagagcagCcuauugacagu.....    | 2    | 1 | bc5 |
| .....aagagaUcagucuaauugacagu.....   | 2    | 1 | bc5 |
| .....aagaUagcagucuaauugacagu.....   | 1    | 1 | bc5 |
| .....aagagagcUgucuaauugacagu.....   | 1    | 1 | bc5 |
| .....aagagagcagucuaauugacagu.....   | 2    | 1 | bc5 |
| .....Gagagagcagucuaauugacagu.....   | 1    | 1 | bc5 |
| .....aagagagcagCcuauugacagu.....    | 1    | 1 | bc5 |
| .....aagagagcagucuaauugacaAu.....   | 1    | 1 | bc5 |
| .....aagagagcaAucauugacagu.....     | 1    | 1 | bc5 |
| .....aagagagcagucuaCugacagu.....    | 2    | 1 | bc5 |
| .....aagagagcagucuaauugacaguU.....  | 36   | 1 | bc5 |
| .....aagagagcagucuaauugacaguc.....  | 3    | 0 | bc5 |
| .....aagagagcagucuaauugacaguA.....  | 1    | 1 | bc5 |
| .....aagagagcagucuaauugacaguUg..... | 1    | 1 | bc5 |
| .....agagagcCgucuaauugacag.....     | 1    | 1 | bc5 |
| .....agagagcCgucuaauugacagu.....    | 14   | 1 | bc5 |
| .....agagagcagucuaauugacagu.....    | 3    | 0 | bc5 |
| .....agagagcagucuaauugacaguU.....   | 1    | 1 | bc5 |
| .....agagcagucuaauugacagu.....      | 2    | 0 | bc5 |
| .....gagcagucuaauugacagu.....       | 12   | 0 | bc5 |
| .....gagcCgucuaauugacagu.....       | 17   | 1 | bc5 |
| .....cgguuacucgaaucuuuac.....       | 6    | 0 | bc5 |
| .....cugucauggagUcgcucucu.....      | 2    | 1 | bc5 |
| .....cugucauggagUcgcucucuuc.....    | 1    | 1 | bc5 |
| .....cugucauggaggcgccucucuuc.....   | 1    | 0 | bc5 |
| .....cugucauggaggcgccucucuucU.....  | 1    | 1 | bc5 |
| .....cugucauggaggcgccucucuuca.....  | 5    | 0 | bc5 |
| .....cugucauggagUcgcucucuuca.....   | 29   | 1 | bc5 |
| .....cugucauggaggcgccucucuucaU..... | 2    | 1 | bc5 |
| .....ugucauggagUcgcucuc.....        | 13   | 1 | bc5 |
| .....ugucauggaggcgccucuc.....       | 10   | 0 | bc5 |
| .....ugucauggaggcgccucuUu.....      | 1    | 1 | bc5 |
| .....ugucauggagUcgcucucu.....       | 41   | 1 | bc5 |
| .....ugucauggaggcgccucucu.....      | 157  | 0 | bc5 |
| .....ugucauggCggcgccucucu.....      | 1    | 1 | bc5 |
| .....ugucauggaggcgccucucG.....      | 3    | 1 | bc5 |
| .....ugucauggagCgcucucu.....        | 1    | 1 | bc5 |
| .....ugucauggaggcgccucucuA.....     | 1    | 1 | bc5 |
| .....uCucauggaggcgccucucu.....      | 1    | 1 | bc5 |
| .....ugucauggagUcgcucucu.....       | 662  | 1 | bc5 |
| .....ugucauggaggcgccucucu.....      | 958  | 0 | bc5 |
| .....ugucauggUggcgccucucu.....      | 2    | 1 | bc5 |
| .....ugucaGggaggcgccucucu.....      | 1    | 1 | bc5 |
| .....ugucauggaggAgcucucu.....       | 2    | 1 | bc5 |
| .....ugucauggaggcgccucucCu.....     | 1    | 1 | bc5 |
| .....ugucauggaggcgccucucCu.....     | 1    | 1 | bc5 |
| .....ugCcauggaggcgccucucu.....      | 1    | 1 | bc5 |
| .....ugucauggaggcgccuUucuu.....     | 2    | 1 | bc5 |
| .....ugucauggaggGgcucucu.....       | 1    | 1 | bc5 |
| .....ugucauggaggUcucucuuc.....      | 2    | 1 | bc5 |
| .....ugucauAagaggcgccucucuuc.....   | 1    | 1 | bc5 |
| .....ugucauggaggcgccucucuU.....     | 11   | 1 | bc5 |
| .....ugAcauggaggcgccucucuuc.....    | 1    | 1 | bc5 |
| .....ugucauggaggcgccucucuuc.....    | 1    | 1 | bc5 |
| .....ugucauggagAgcucucuuc.....      | 1    | 1 | bc5 |
| .....ugucauggaggcgccucucuUG.....    | 1    | 1 | bc5 |
| .....ugucauggaggcgccucucuuc.....    | 552  | 0 | bc5 |
| .....ugGcauggaggcgccucucuuc.....    | 1    | 1 | bc5 |
| .....ugucauggaggcAcucucuuc.....     | 1    | 1 | bc5 |
| .....ugucauggCggcgccucucuuc.....    | 1    | 1 | bc5 |
| .....ugucauggaggcgccucuAuuc.....    | 1    | 1 | bc5 |



gagagccgacugaaacugaagagagcagucuaugacagucgguuacucgaaucuuacucugucauggaggcgucucuucagauaugucuggccc

|                                   |       |   |     |
|-----------------------------------|-------|---|-----|
| .....ugucauggaggcgucucuua.....    | 1     | 1 | bc5 |
| .....ugucauggUggcgucucuuc.....    | 1     | 1 | bc5 |
| .....ugucauggagUcgucucuuc.....    | 290   | 1 | bc5 |
| .....ugucauggaggcgucucuua.....    | 3     | 1 | bc5 |
| .....ugucauggaggcgucAcuua.....    | 1     | 1 | bc5 |
| .....ugucauggaggcgucucuuc.....    | 22    | 1 | bc5 |
| .....ugucauggaggcgucucuua.....    | 7365  | 0 | bc5 |
| .....ugucauggagUcgucucuua.....    | 20732 | 1 | bc5 |
| .....ugucauggaggAcucucuua.....    | 1     | 1 | bc5 |
| .....ugucauggaggcgucucuCca.....   | 17    | 1 | bc5 |
| .....ugucauggaggcgucucuuc.....    | 1289  | 1 | bc5 |
| .....Agucauggaggcgucucuua.....    | 1     | 1 | bc5 |
| .....ugucaAggaggcgucucuua.....    | 3     | 1 | bc5 |
| .....ugucUuggaggcgucucuua.....    | 1     | 1 | bc5 |
| .....uguUauggaggcgucucuua.....    | 2     | 1 | bc5 |
| .....ugucauUgaggcgucucuua.....    | 6     | 1 | bc5 |
| .....ugucauggaggcgUucucuua.....   | 1     | 1 | bc5 |
| .....ugucaugAaggcgucucuua.....    | 2     | 1 | bc5 |
| .....ugCcauggaggcgucucuua.....    | 1     | 1 | bc5 |
| .....ugucauggaggGucucuua.....     | 1     | 1 | bc5 |
| .....ugucauggaggcgucucuGca.....   | 3     | 1 | bc5 |
| .....uguAauggaggcgucucuua.....    | 1     | 1 | bc5 |
| .....ugucauggGggcgucucuua.....    | 6     | 1 | bc5 |
| .....ugucauggaggcgucCuca.....     | 2     | 1 | bc5 |
| .....ugucauggaggcgucAuca.....     | 1     | 1 | bc5 |
| .....ugGcauggaggcgucucuua.....    | 1     | 1 | bc5 |
| .....ugucauggaggcgucucuAca.....   | 3     | 1 | bc5 |
| .....Cgucauggaggcgucucuua.....    | 3     | 1 | bc5 |
| .....uUucauggaggcgucucuua.....    | 1     | 1 | bc5 |
| .....ugucauggagAagcgucucuua.....  | 9     | 1 | bc5 |
| .....ugucauggaggAgcucucuua.....   | 2     | 1 | bc5 |
| .....ugucauggaggGgcucucuua.....   | 9     | 1 | bc5 |
| .....ugucaCggaggcgucucuua.....    | 1     | 1 | bc5 |
| .....ugucauggaggcgGcucucuua.....  | 1     | 1 | bc5 |
| .....ugucauggaggcgcuUucucuua..... | 2     | 1 | bc5 |
| .....ugucauggaggcgucCcuua.....    | 2     | 1 | bc5 |
| .....ugucGuggaggcgucucuua.....    | 2     | 1 | bc5 |
| .....ugucauggaggcgcuAucucuua..... | 2     | 1 | bc5 |
| .....ugucauggCggcgucucuua.....    | 2     | 1 | bc5 |
| .....ugucauggaggUcucucuua.....    | 1     | 1 | bc5 |
| .....ugucauggUggcgucucuua.....    | 2     | 1 | bc5 |
| .....ugucauggaggUgcucucuua.....   | 5     | 1 | bc5 |
| .....ugucauggaggcgCcuucuua.....   | 1     | 1 | bc5 |
| .....ugucauAaggcgucucuua.....     | 3     | 1 | bc5 |
| .....ugucauggaggcgucucuUa.....    | 5     | 1 | bc5 |
| .....ugucauggaggcgAucucuua.....   | 4     | 1 | bc5 |
| .....ugucauggaggcgucucuucG.....   | 32    | 1 | bc5 |
| .....ugucaugUaggcgucucuua.....    | 2     | 1 | bc5 |
| .....ugucauggaggcgAcucuua.....    | 1     | 1 | bc5 |
| .....ugAcauggaggcgucucuua.....    | 1     | 1 | bc5 |
| .....ugucauggagCcgucucuua.....    | 14    | 1 | bc5 |
| .....ugucauggaCgcgucucuua.....    | 1     | 1 | bc5 |
| .....ugucauggaggcgucucuUuua.....  | 3     | 1 | bc5 |
| .....ugucauggagUcgucucuucag.....  | 4     | 1 | bc5 |
| .....ugucauggaggcgucucuuaU.....   | 408   | 1 | bc5 |
| .....ugucauggaggcgucucuuaA.....   | 15    | 1 | bc5 |
| .....ugucauggaggcgucucuucag.....  | 2     | 0 | bc5 |
| .....ugucauggagUcgucucuucaga..... | 1     | 1 | bc5 |
| .....ugucauggaggcgucucuuaUa.....  | 2     | 1 | bc5 |
| .....gucauggaggcgucucu.....       | 1     | 0 | bc5 |
| .....gucauggagUcgucucuua.....     | 30    | 1 | bc5 |
| .....gucauggaggcgucucuua.....     | 14    | 0 | bc5 |
| .....gucauggaggcgucucuucU.....    | 5     | 1 | bc5 |
| .....ucauggagUcgucucuua.....      | 4     | 1 | bc5 |
| .....cauggaggcgucucuua.....       | 2     | 0 | bc5 |
| .....auggagUcgucucuua.....        | 22    | 1 | bc5 |
| .....auggaggcgucucuua.....        | 12    | 0 | bc5 |
| .....aagagagcGucuaugaca.....      | 1     | 1 | bc2 |

gagagccgacugaaacugaaagagagcagucuaauugacagucgguuacucgaaucuuacugucaugggaggcgucucuucaagaugaugucggccc

|                                    |      |   |     |
|------------------------------------|------|---|-----|
| .....aagagagcagucuaauugacGg.....   | 1    | 1 | bc2 |
| .....aagagagcagucuaauugacag.....   | 33   | 0 | bc2 |
| .....aagagagcCgucuaauugacag.....   | 92   | 1 | bc2 |
| .....aagagagcUgucuaauugacag.....   | 1    | 1 | bc2 |
| .....aagagaUcagucuaauugacagu.....  | 1    | 1 | bc2 |
| .....aagagagcagucuaauugacUgu.....  | 1    | 1 | bc2 |
| .....aagagagcagAcuaauugacagu.....  | 1    | 1 | bc2 |
| .....aagagagcagucuaauugacagu.....  | 786  | 0 | bc2 |
| .....aagagagcaUucuaauugacagu.....  | 1    | 1 | bc2 |
| .....aagagagcagucuaauugacagu.....  | 1    | 1 | bc2 |
| .....aagagagcagucuaCugacagu.....   | 1    | 1 | bc2 |
| .....aagagagcCgucuaauugacagu.....  | 1397 | 1 | bc2 |
| .....aagagagcagCcuauugacagu.....   | 1    | 1 | bc2 |
| .....aagagagcagCcuauugacagu.....   | 1    | 1 | bc2 |
| .....aagagagcagucuaauugacaAu.....  | 1    | 1 | bc2 |
| .....aagagagcagucCauugacagu.....   | 1    | 1 | bc2 |
| .....Gagagagcagucuaauugacagu.....  | 1    | 1 | bc2 |
| .....aagagagGagucuaauugacagu.....  | 2    | 1 | bc2 |
| .....aagCgagcagucuaauugacagu.....  | 1    | 1 | bc2 |
| .....aagagagcagucuaauugacaguU..... | 13   | 1 | bc2 |
| .....agagagcCgucuaauugacagu.....   | 2    | 1 | bc2 |
| .....agagagcagucuaauugacagucU..... | 1    | 1 | bc2 |
| .....agagcCgucuaauugacagu.....     | 1    | 1 | bc2 |
| .....gagcagucuaauugacagu.....      | 4    | 0 | bc2 |
| .....gagcCgucuaauugacagu.....      | 6    | 1 | bc2 |
| .....cugucauggaggcgucucuu.....     | 2    | 0 | bc2 |
| .....cugucauggaggUcgucucuu.....    | 1    | 1 | bc2 |
| .....cugucauggaggcgucucuuca.....   | 3    | 0 | bc2 |
| .....cugucauggaggUcgucucuuca.....  | 16   | 1 | bc2 |
| .....ugucauggaggcgucuc.....        | 9    | 0 | bc2 |
| .....ugucauggaggUcgucuc.....       | 11   | 1 | bc2 |
| .....ugucauggaggcgucucu.....       | 44   | 0 | bc2 |
| .....ugucauggaggUcgucucu.....      | 17   | 1 | bc2 |
| .....ugucauggaggcgucucuC.....      | 1    | 1 | bc2 |
| .....ugucauggUggcgucucuu.....      | 1    | 1 | bc2 |
| .....ugucauggaggcgucucuu.....      | 391  | 0 | bc2 |
| .....ugucauggaggcgucucuA.....      | 1    | 1 | bc2 |
| .....ugucauggCggcgucucuu.....      | 1    | 1 | bc2 |
| .....ugucaAaggaggcgucucuu.....     | 1    | 1 | bc2 |
| .....ugucauggGggcgucucuu.....      | 1    | 1 | bc2 |
| .....ugucauggaggGcgucucuu.....     | 2    | 1 | bc2 |
| .....ugucauggaggUcgucucuu.....     | 302  | 1 | bc2 |
| .....ugucaugAaggcgucucuu.....      | 1    | 1 | bc2 |
| .....ugucauggaggGcgucucuu.....     | 1    | 1 | bc2 |
| .....ugucauggaggcgGcucuu.....      | 1    | 1 | bc2 |
| .....ugucauggaggcgucucuU.....      | 4    | 1 | bc2 |
| .....ugucauggaggCcgucucuu.....     | 1    | 1 | bc2 |
| .....ugucauggGggcgucucuu.....      | 1    | 1 | bc2 |
| .....ugucauggaggcgCucuu.....       | 1    | 1 | bc2 |
| .....ugucauggaggcgucucuu.....      | 256  | 0 | bc2 |
| .....ugucauggaggUcgucucuu.....     | 151  | 1 | bc2 |
| .....ugucauggaggcgucucuGa.....     | 2    | 1 | bc2 |
| .....ugucauggaggCucucuuca.....     | 1    | 1 | bc2 |
| .....ugucauggaggGcucucuuca.....    | 3    | 1 | bc2 |
| .....ugucauggaggcgucucuGuca.....   | 1    | 1 | bc2 |
| .....Ggucaugggaggcgucucuuca.....   | 1    | 1 | bc2 |
| .....ugucauggaUcgucucuuca.....     | 1    | 1 | bc2 |
| .....ugucauggaggcgucucuUuca.....   | 4    | 1 | bc2 |
| .....ugucGuggaggcgucucuuca.....    | 1    | 1 | bc2 |
| .....ugucauggaggAcgucucuuca.....   | 9    | 1 | bc2 |
| .....ugucauggaggcgucucuU.....      | 455  | 1 | bc2 |
| .....ugucauggaggCcgucucuuca.....   | 17   | 1 | bc2 |
| .....uAucauggaggcgucucuuca.....    | 1    | 1 | bc2 |
| .....ugucauggaggcgUucucuuca.....   | 1    | 1 | bc2 |
| .....ugucUuggaggcgucucuuca.....    | 1    | 1 | bc2 |
| .....ugAcauggaggcgucucuuca.....    | 1    | 1 | bc2 |
| .....ugucauggaggcgucucuCcuca.....  | 1    | 1 | bc2 |
| .....ugucauggaggcgucucuAca.....    | 4    | 1 | bc2 |
| .....ugucauggaggcgucucuGca.....    | 3    | 1 | bc2 |

gagagccgacugaaacugaaagagagcagucuaugacagucgguuacucgaaucuuacugucauggaggcgucucuucaagaugaucuggccc

|                                   |      |   |     |
|-----------------------------------|------|---|-----|
| .....uguUauggaggcgucucuuca.....   | 2    | 1 | bc2 |
| .....ugucauggaggcgucucuuca.....   | 3268 | 0 | bc2 |
| .....ugucauggaggcgucucuuUa.....   | 1    | 1 | bc2 |
| .....ugucauggaggcgcuUucuuca.....  | 1    | 1 | bc2 |
| .....ugucaUauggaggcgucucuuca..... | 1    | 1 | bc2 |
| .....ugGcauggaggcgucucuuca.....   | 1    | 1 | bc2 |
| .....ugucauggGggcgucucuuca.....   | 4    | 1 | bc2 |
| .....ugucauggUggcgucucuuca.....   | 1    | 1 | bc2 |
| .....Cgucauggaggcgucucuuca.....   | 1    | 1 | bc2 |
| .....ugucauggaggAgcucucuuca.....  | 2    | 1 | bc2 |
| .....ugucauggaggUcucucuuca.....   | 3    | 1 | bc2 |
| .....uguAauggaggcgucucuuca.....   | 1    | 1 | bc2 |
| .....ugucauggaggcgucucuuucG.....  | 6    | 1 | bc2 |
| .....ugucauggaggGaucucuuca.....   | 2    | 1 | bc2 |
| .....ugucauggaggcgucucucCa.....   | 3    | 1 | bc2 |
| .....ugucauggaggcgucucAuca.....   | 1    | 1 | bc2 |
| .....ugucauggagUcgucucuuca.....   | 9246 | 1 | bc2 |
| .....ugucauggaggcgucucuuAa.....   | 2    | 1 | bc2 |
| .....ugucauggaggAcucucuuca.....   | 1    | 1 | bc2 |
| .....ugucauAaggaggcgucucuuca..... | 1    | 1 | bc2 |
| .....uguGauggaggcgucucuuca.....   | 1    | 1 | bc2 |
| .....ugucCuggaggcgucucuuca.....   | 1    | 1 | bc2 |
| .....ugucauggaggcgucucuuucC.....  | 6    | 1 | bc2 |
| .....ugucauggaggcgucucuuAuca..... | 3    | 1 | bc2 |
| .....ugucauggaggcgcuAucuuca.....  | 2    | 1 | bc2 |
| .....ugucauggaggcgucucuucaU.....  | 129  | 1 | bc2 |
| .....ugucauggaggcgucucuucaA.....  | 7    | 1 | bc2 |
| .....ugucauggagUcgucucuuucag..... | 1    | 1 | bc2 |
| .....gucauggaggcgucucuuca.....    | 10   | 0 | bc2 |
| .....gCcauggaggcgucucuuca.....    | 1    | 1 | bc2 |
| .....gucauggagUcgucucuuca.....    | 16   | 1 | bc2 |
| .....cauggagUcgucucuuca.....      | 1    | 1 | bc2 |
| .....auggagUcgucucuuca.....       | 12   | 1 | bc2 |
| .....auggaggcgucucuuca.....       | 3    | 0 | bc2 |
| .....Caagagagcagucuaugacagu.....  | 1    | 1 | bc7 |
| .....aagagagcCgucuaugac.....      | 3    | 1 | bc7 |
| .....aagagagcagucuaugaca.....     | 1    | 0 | bc7 |
| .....aagagagcCgucuaugacag.....    | 226  | 1 | bc7 |
| .....aagagagcagucuaugacag.....    | 122  | 0 | bc7 |
| .....aagagagcagucuaugacGg.....    | 1    | 1 | bc7 |
| .....aagagagcagucuaucacag.....    | 1    | 1 | bc7 |
| .....aagagagcagucCauugacag.....   | 1    | 1 | bc7 |
| .....aagagagcagucuaugaGagu.....   | 2    | 1 | bc7 |
| .....aagagagcagCcuauugacagu.....  | 2    | 1 | bc7 |
| .....aagagCgcagucuaugacagu.....   | 2    | 1 | bc7 |
| .....aagagagcagucuaugacGgu.....   | 2    | 1 | bc7 |
| .....aagagagcagucuaugacagu.....   | 2338 | 0 | bc7 |
| .....aaAagagcagucuaugacagu.....   | 2    | 1 | bc7 |
| .....Gagagagcagucuaugacagu.....   | 2    | 1 | bc7 |
| .....aagagagcCgucuaugacagu.....   | 3345 | 1 | bc7 |
| .....aagagagcagAcuaugacagu.....   | 2    | 1 | bc7 |
| .....aagagagcagucuaugacagu.....   | 1    | 1 | bc7 |
| .....aagagagcagucCauugacagu.....  | 1    | 1 | bc7 |
| .....aagagagcagucuaugGcagu.....   | 2    | 1 | bc7 |
| .....aagagagcagucuaugUcagu.....   | 1    | 1 | bc7 |
| .....aagagUgcagucuaugacagu.....   | 2    | 1 | bc7 |
| .....aagagagcUgucuaugacagu.....   | 2    | 1 | bc7 |
| .....aagagagcagucGuugacagu.....   | 1    | 1 | bc7 |
| .....aagagagcagucuaugacCgu.....   | 3    | 1 | bc7 |
| .....aagagagcagucuaucgacagu.....  | 1    | 1 | bc7 |
| .....aagagagcagucUuugacagu.....   | 1    | 1 | bc7 |
| .....aagagagcagucuaugaAagu.....   | 2    | 1 | bc7 |
| .....aagagagcagucuaugacagG.....   | 3    | 1 | bc7 |
| .....aagagGgcagucuaugacagu.....   | 1    | 1 | bc7 |
| .....aagagagcagucuaugacagu.....   | 1    | 1 | bc7 |
| .....aagagagcagucuaugaUagu.....   | 2    | 1 | bc7 |
| .....aagagagcGgucuaugacagu.....   | 1    | 1 | bc7 |
| .....aagagagcagucuaugacaguc.....  | 1    | 0 | bc7 |

gagagccgacugaaacugaaagagagcagucuaauugacagucgguuacCcgaaacuuuacugucauggaggcgucucuucaagaugucuggccc

|                                     |      |   |     |
|-------------------------------------|------|---|-----|
| .....aagagagcagucuaauugacaguA.....  | 1    | 1 | bc7 |
| .....aagagagcagucuaauugacaguU.....  | 25   | 1 | bc7 |
| .....aagagagcagucuaauugacaguUg..... | 1    | 1 | bc7 |
| .....agagagcCgucuaauugacag.....     | 4    | 1 | bc7 |
| .....agagagcCgucuaauugacagu.....    | 22   | 1 | bc7 |
| .....Aagagcagucuaauugacagu.....     | 1    | 1 | bc7 |
| .....agagcCgucuaauugacagu.....      | 1    | 1 | bc7 |
| .....gagcagucuaauugacagu.....       | 11   | 0 | bc7 |
| .....gagcCgucuaauugacagu.....       | 14   | 1 | bc7 |
| .....cgguuacCcgaaacuuuac.....       | 1    | 1 | bc7 |
| .....cgguuacucgaaacuuuac.....       | 1    | 0 | bc7 |
| .....cugucauggagUcgcucucuu.....     | 2    | 1 | bc7 |
| .....cugucauggaggcgucucuu.....      | 3    | 0 | bc7 |
| .....cugucauggaggcgucucuuca.....    | 3    | 0 | bc7 |
| .....cugucauggaggcgucucuuU.....     | 3    | 1 | bc7 |
| .....cugucauggagUcgcucucuuca.....   | 19   | 1 | bc7 |
| .....ugucauggagUcgcucuc.....        | 19   | 1 | bc7 |
| .....ugucauggaggcgucuc.....         | 14   | 0 | bc7 |
| .....ugucauggaggcgcuUuc.....        | 1    | 1 | bc7 |
| .....ugucauggaggcgucucG.....        | 1    | 1 | bc7 |
| .....ugucauggaggcgCccuc.....        | 1    | 1 | bc7 |
| .....ugucauggaggcgucucA.....        | 1    | 1 | bc7 |
| .....ugucauggaggcgucucCcu.....      | 1    | 1 | bc7 |
| .....ugucauggaggcgucuc.....         | 198  | 0 | bc7 |
| .....ugucauggaggAgcucuc.....        | 1    | 1 | bc7 |
| .....ugucauggagUcgcucuc.....        | 66   | 1 | bc7 |
| .....ugucauggaggcgucuu.....         | 1    | 1 | bc7 |
| .....uguGauggaggcgucucuu.....       | 1    | 1 | bc7 |
| .....ugucauggagAcgucucuu.....       | 1    | 1 | bc7 |
| .....ugucauggagUcgcucucuu.....      | 819  | 1 | bc7 |
| .....ugucauggaggcgcuAucuu.....      | 1    | 1 | bc7 |
| .....ugucauggaggcgCccucuu.....      | 1    | 1 | bc7 |
| .....ugucauggaggAgcucucuu.....      | 2    | 1 | bc7 |
| .....ugucauggaggcgGucucuu.....      | 1    | 1 | bc7 |
| .....ugucauggagCcgucucuu.....       | 6    | 1 | bc7 |
| .....ugucauggUggcgucucuu.....       | 4    | 1 | bc7 |
| .....uUucauggaggcgucucuu.....       | 1    | 1 | bc7 |
| .....ugucauggaggcgucucuaA.....      | 1    | 1 | bc7 |
| .....ugucauggaggCccucucuu.....      | 1    | 1 | bc7 |
| .....ugucauggaggcgUucucuu.....      | 1    | 1 | bc7 |
| .....ugucauggaggcgucucuu.....       | 1378 | 0 | bc7 |
| .....Cgucauggaggcgucucuu.....       | 1    | 1 | bc7 |
| .....ugGcauggaggcgucucuu.....       | 2    | 1 | bc7 |
| .....ugucauggaggGcgucucuu.....      | 1    | 1 | bc7 |
| .....ugucaAaggaggcgucucuu.....      | 1    | 1 | bc7 |
| .....ugucauggaggcgucucuuG.....      | 3    | 1 | bc7 |
| .....ugucauggaggcgAucucuu.....      | 1    | 1 | bc7 |
| .....ugucauggaggcgucucuu.....       | 579  | 0 | bc7 |
| .....ugGcauggaggcgucucuu.....       | 1    | 1 | bc7 |
| .....ugCcauggaggcgucucuu.....       | 1    | 1 | bc7 |
| .....ugucaugUaggcgucucuu.....       | 1    | 1 | bc7 |
| .....ugucauggUggcgucucuu.....       | 1    | 1 | bc7 |
| .....ugucaugAaggcgucucuu.....       | 1    | 1 | bc7 |
| .....ugucauggaggcgucCcu.....        | 1    | 1 | bc7 |
| .....Agucauggaggcgucucuu.....       | 1    | 1 | bc7 |
| .....ugucGuggaggcgucucuu.....       | 1    | 1 | bc7 |
| .....ugucauggaggcgcuUucuu.....      | 1    | 1 | bc7 |
| .....ugucauggaggcgucucuuU.....      | 10   | 1 | bc7 |
| .....ugucauggagUcgcucucuu.....      | 349  | 1 | bc7 |
| .....ugucauggaggcgucAucuu.....      | 1    | 1 | bc7 |
| .....ugucauggCggcgucucuu.....       | 1    | 1 | bc7 |
| .....ugucGuggaggcgucucuuca.....     | 6    | 1 | bc7 |
| .....ugucauggaggcgAucucuuca.....    | 3    | 1 | bc7 |
| .....ugucauggaUcgcucucuuca.....     | 1    | 1 | bc7 |
| .....ugucauggaggGcgucucuuca.....    | 13   | 1 | bc7 |
| .....ugucaCggaggcgucucuuca.....     | 2    | 1 | bc7 |
| .....ugucauggaggcUucucuuca.....     | 3    | 1 | bc7 |
| .....ugucauggaggcgucucuuC.....      | 13   | 1 | bc7 |
| .....ugucauggaggcgcuAucuuca.....    | 6    | 1 | bc7 |

gagagccgacugaaacugaaagagagcagucuaugacagucgguuacucgaaucuuacugucauggaggcgucucuucagaugaugucuggccc

|                                    |       |   |     |
|------------------------------------|-------|---|-----|
| .....ugucauggagCcgucucuua.....     | 49    | 1 | bc7 |
| .....ugucauggaggcgucucuCca.....    | 22    | 1 | bc7 |
| .....uguaAuggaggcgucucuua.....     | 1     | 1 | bc7 |
| .....ugGcauggaggcgucucuua.....     | 7     | 1 | bc7 |
| .....ugucauggaggcgucucuGcuua.....  | 1     | 1 | bc7 |
| .....ugucauggaggcgucucuCuca.....   | 1     | 1 | bc7 |
| .....ugucauggaggcgucucuGucuua..... | 1     | 1 | bc7 |
| .....ugucauggaggcCucucuua.....     | 1     | 1 | bc7 |
| .....ugucauggaggcgcAcucuua.....    | 1     | 1 | bc7 |
| .....ugucauggaggcgucucuUuua.....   | 4     | 1 | bc7 |
| .....ugucauGaggcgucucuua.....      | 1     | 1 | bc7 |
| .....ugCcauggaggcgucucuua.....     | 1     | 1 | bc7 |
| .....ugucauAaggcgucucuua.....      | 1     | 1 | bc7 |
| .....ugucauggaggcgucucuAca.....    | 5     | 1 | bc7 |
| .....uguuAuggaggcgucucuua.....     | 3     | 1 | bc7 |
| .....ugucauggaggcgUucucuua.....    | 2     | 1 | bc7 |
| .....ugucauggagUcgucucuua.....     | 19121 | 1 | bc7 |
| .....ugucauUgaggcgucucuua.....     | 1     | 1 | bc7 |
| .....ugucauggaggcgucucuCcuua.....  | 3     | 1 | bc7 |
| .....ugucauggaggcgcCcuua.....      | 2     | 1 | bc7 |
| .....ugucauggaggcgucucuuaAa.....   | 7     | 1 | bc7 |
| .....ugucauggaggcgucucuucG.....    | 18    | 1 | bc7 |
| .....ugucaGgaggcgucucuua.....      | 1     | 1 | bc7 |
| .....ugucaugAaggcgucucuua.....     | 2     | 1 | bc7 |
| .....ugucauggaggcgucucuUuua.....   | 1     | 1 | bc7 |
| .....ugucauggaCgucucuua.....       | 1     | 1 | bc7 |
| .....ugucauggaggcgucucuua.....     | 6267  | 0 | bc7 |
| .....ugucauggagAcgucucuua.....     | 16    | 1 | bc7 |
| .....ugucauggaggcgucucuucU.....    | 1349  | 1 | bc7 |
| .....ugucauggaggcgucucuuaGa.....   | 2     | 1 | bc7 |
| .....ugucauggaggcAcucuua.....      | 4     | 1 | bc7 |
| .....uAucauggaggcgucucuua.....     | 2     | 1 | bc7 |
| .....ugucauggGggcgucucuua.....     | 6     | 1 | bc7 |
| .....ugucauggaggUgcucuua.....      | 3     | 1 | bc7 |
| .....ugucauggaggcgucucuUa.....     | 2     | 1 | bc7 |
| .....Cgucauggaggcgucucuua.....     | 5     | 1 | bc7 |
| .....ugucauggaggcgucucuAuua.....   | 2     | 1 | bc7 |
| .....ugucauggaggAgcucuua.....      | 4     | 1 | bc7 |
| .....ugucCuggaggcgucucuua.....     | 1     | 1 | bc7 |
| .....Ggucauggaggcgucucuua.....     | 4     | 1 | bc7 |
| .....ugucaugCaggcgucucuua.....     | 2     | 1 | bc7 |
| .....ugucauggCggcgucucuua.....     | 1     | 1 | bc7 |
| .....ugucauggUggcgucucuua.....     | 10    | 1 | bc7 |
| .....ugucauggagUcgucucuucag.....   | 1     | 1 | bc7 |
| .....ugucauggaggcgucucuucag.....   | 2     | 0 | bc7 |
| .....ugucauggaggcgucucuuaU.....    | 364   | 1 | bc7 |
| .....ugucauggaggcgucucuuaA.....    | 13    | 1 | bc7 |
| .....ugucauggaggcgucucuuaAa.....   | 2     | 1 | bc7 |
| .....ugucauggaggcgucucuuaCa.....   | 1     | 1 | bc7 |
| .....gucauggaggcgucucuuc.....      | 1     | 0 | bc7 |
| .....gucauggagUcgucucuua.....      | 27    | 1 | bc7 |
| .....gucauggaggcgucucuucU.....     | 4     | 1 | bc7 |
| .....gucauggaggcgucucuCca.....     | 1     | 1 | bc7 |
| .....gucauggaggcgucucuua.....      | 16    | 0 | bc7 |
| .....ucauggaggcgucucuua.....       | 1     | 0 | bc7 |
| .....ucauggagUcgucucuua.....       | 1     | 1 | bc7 |
| .....ucauggagAcgucucuua.....       | 1     | 1 | bc7 |
| .....cauggaggcgucucuua.....        | 1     | 0 | bc7 |
| .....cauggagUcgucucuua.....        | 1     | 1 | bc7 |
| .....auggagUcgucucuua.....         | 19    | 1 | bc7 |
| .....auggaggcgucucuua.....         | 15    | 0 | bc7 |
