# Supplementary material for: Reliable reference miRNAs for quantitative gene expression analysis of stress responses in Caenorhabditis elegans
Source: PubMed Central journal article supplement (PMC3997968; doi:10.1186/1471-2164-15-222), 2014-03-21

# All conditions

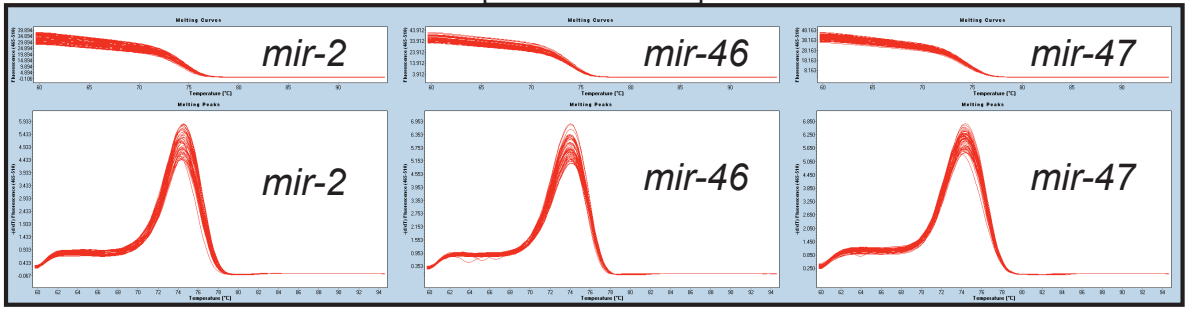

# UV

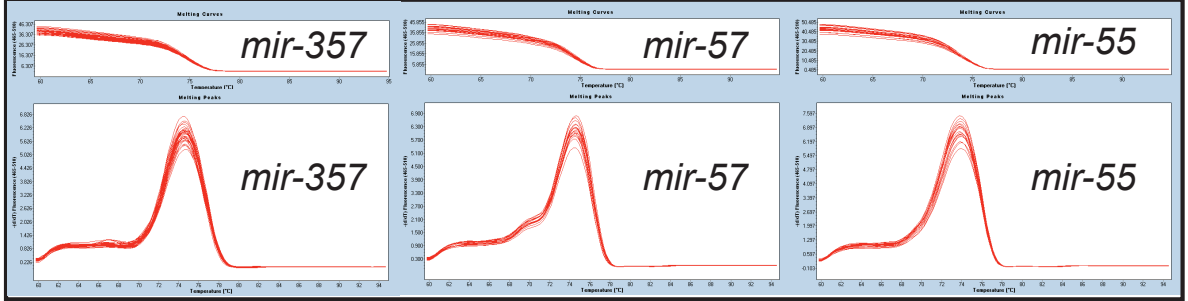

# Heat stress

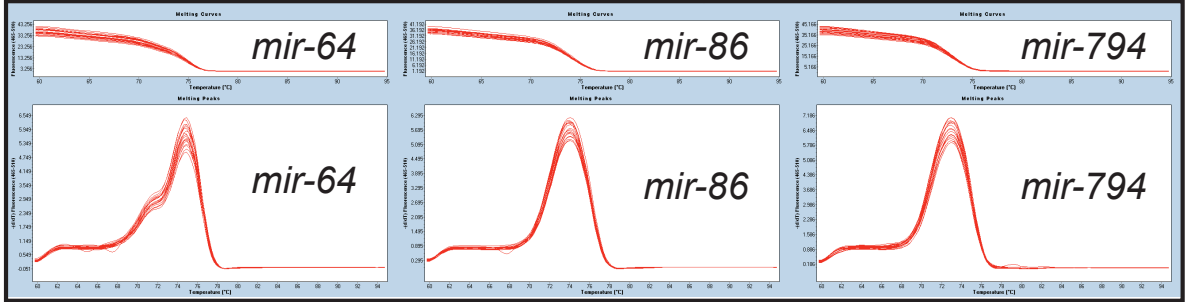

# Hypoxia N2+hif-1

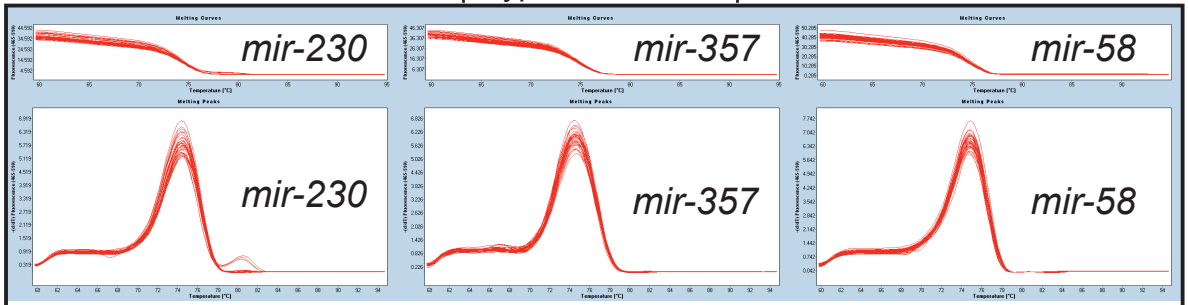

# Hypoxia N2

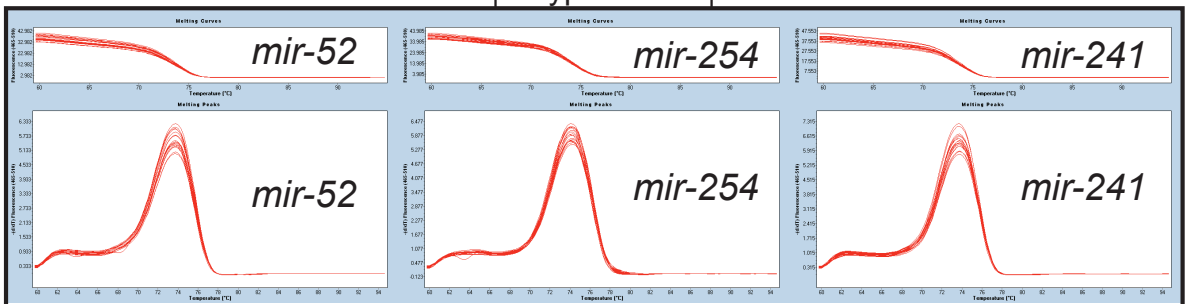

Supplement: 1471-2164-15-222-S7.pdf [file 1471-2164-15-222-S7.pdf]
