# Supplementary material for: Reliable reference miRNAs for quantitative gene expression analysis of stress responses in Caenorhabditis elegans
Source: PubMed Central journal article supplement (PMC3997968; doi:10.1186/1471-2164-15-222), 2014-03-21
Supplement: 1471-2164-15-222-S8.pdf [file 1471-2164-15-222-S8.pdf]

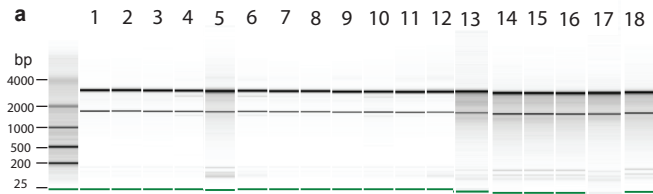

**b**

|    | Sample type                    | 260/280 | 260/230 | RIN |
|----|--------------------------------|---------|---------|-----|
| 1  | UV sample 1                    | 2.2     | 2.51    | 9.6 |
| 2  | UV sample 2                    | 2.19    | 2.48    | 9.7 |
| 3  | UV sample 3                    | 2.21    | 2.43    | 9.7 |
| 4  | Temp. sample 1                 | 2.21    | 2.45    | 9.6 |
| 5  | Temp. sample 2                 | 2.06    | 2.25    | 9.6 |
| 6  | Temp. sample 3                 | 2.17    | 2.02    | 9.8 |
| 7  | N2 Hypoxia sample 1            | 2.19    | 2.43    | 9.9 |
| 8  | N2 Hypoxia sample 2            | 2.20    | 2.47    | 10  |
| 9  | N2 Hypoxia sample 3            | 2.19    | 2.43    | 9.2 |
| 10 | N2 control sample 1            | 2.19    | 2.45    | 9.2 |
| 11 | N2 control sample 2            | 2.17    | 2.36    | 9.9 |
| 12 | N2 control sample 3            | 2.14    | 2.24    | 10  |
| 13 | hif-1 Hypoxia sample 1         | 2.20    | 2.52    | 7.2 |
| 14 | hif-1 Hypoxia sample 2         | 2.21    | 2.28    | 7.1 |
| 15 | hif-1 Hypoxia sample 3         | 2.21    | 2.51    | 7.2 |
| 16 | hif-1 Hypoxia control sample 1 | 2.21    | 2.42    | 7.2 |
| 17 | hif-1 Hypoxia control sample 2 | 2.22    | 2.40    | 7.2 |
| 18 | hif-1 Hypoxia control sample 3 | 2.20    | 2.49    | 7.5 |
